# Supplementary material for: ASD Phenotype—Genotype Associations in Concordant and Discordant Monozygotic and Dizygotic Twins Stratified by Severity of Autistic Traits
Source: MDPI journal article supplement (doi:10.3390/ijms20153804), 2019-08-03
Supplement: s1 [file s1]

| All trait QTNs for dNA.DZ twins |            |           |          |        |                |             |             |           |
|---------------------------------|------------|-----------|----------|--------|----------------|-------------|-------------|-----------|
| Language                        |            |           |          |        |                |             |             |           |
| CHR                             | SNP        | BP        | P        | Band   | Genes          | Role        | aa Position | aa Change |
| 18                              | rs7232149  | 10937468  | 8.19E-12 | p11.21 | PIEZO2         | intronic    |             |           |
| 18                              | rs9952954  | 10939093  | 8.19E-12 | p11.21 | PIEZO2         | intronic    |             |           |
| 1                               | rs1555026  | 23759792  | 4.66E-09 | p36.12 | ID3            | 5upstream   |             |           |
| 1                               | rs877518   | 23767741  | 4.66E-09 | p36.12 |                |             |             |           |
| 3                               | rs1822395  | 158755076 | 1.80E-08 | q25.32 | C3orf55        | intronic    |             |           |
| 13                              | rs10507627 | 58485722  | 1.80E-08 | q21.1  |                |             |             |           |
| 2                               | rs384180   | 6483994   | 2.50E-08 | p25.2  |                |             |             |           |
| 2                               | rs10498133 | 222812549 | 2.50E-08 | q36.1  | PAX3           | intronic    |             |           |
| 4                               | rs17005123 | 82534494  | 2.50E-08 | q21.21 |                |             |             |           |
| 5                               | rs16902290 | 34522293  | 2.50E-08 | p13.2  |                |             |             |           |
| 6                               | rs17287803 | 42039979  | 2.50E-08 | p21.1  | CCND3          | intronic    |             |           |
| 8                               | rs16868879 | 103095400 | 2.50E-08 | q22.3  | NCALD          | intronic    |             |           |
| 12                              | rs7135813  | 85718641  | 2.50E-08 | q21.32 | MGAT4C         | intronic    |             |           |
| 14                              | rs1957173  | 45476666  | 2.50E-08 | q21.2  |                |             |             |           |
| 18                              | rs401127   | 6305088   | 2.50E-08 | p11.31 | L3MBTL4        | intronic    |             |           |
| 18                              | rs236035   | 6320209   | 2.50E-08 | p11.31 | L3MBTL4        | intronic    |             |           |
| 12                              | rs12812815 | 85758126  | 3.97E-08 | q21.32 | MGAT4C         | 5upstream   |             |           |
| 8                               | rs11984453 | 4491939   | 5.48E-08 | p23.2  | CSMD1          | intronic    |             |           |
| 5                               | rs7444875  | 34520901  | 6.58E-08 | p13.2  |                |             |             |           |
| 3                               | rs17035408 | 36662904  | 7.19E-08 | p22.2  |                |             |             |           |
| 2                               | rs2216328  | 56260472  | 8.74E-08 | p16.1  | AC007743.1/RP1 | non-coding  |             |           |
| 2                               | rs2138380  | 202877469 | 1.48E-07 | q33.1  | NOP58          | 3downstream |             |           |
| 2                               | rs2350807  | 203004035 | 1.48E-07 | q33.1  | BMPR2          | intronic    |             |           |
| 2                               | rs12987781 | 203078111 | 1.48E-07 | q33.2  | BMPR2          | intronic    |             |           |
| 2                               | rs17199249 | 203134913 | 1.48E-07 | q33.2  | BMPR2          | 3utr        |             |           |
| 12                              | rs2053629  | 39429400  | 1.78E-07 | q12    | CNTN1          | intronic    |             |           |
| 12                              | rs310830   | 75943724  | 4.16E-07 | q21.2  | E2F7           | coding      | 770         | S>S       |
| 7                               | rs10487202 | 103791913 | 6.02E-07 | q22.2  | LHFPL3         | intronic    |             |           |
| 13                              | rs17087794 | 70445442  | 6.81E-07 | q21.33 |                |             |             |           |

|    |            |           |          |        |                |               |  |  |
|----|------------|-----------|----------|--------|----------------|---------------|--|--|
| 6  | rs228139   | 55736242  | 8.25E-07 | p12.1  | BMP5           | intronic      |  |  |
| 21 | rs2032314  | 34276393  | 9.07E-07 | q22.11 |                |               |  |  |
| 2  | rs1861773  | 56256352  | 1.18E-06 | p16.1  | AC007743.1/RP1 | non-coding    |  |  |
| 2  | rs934374   | 23619790  | 1.27E-06 | p24.1  | KLHL29         | intronic      |  |  |
| 4  | rs13110248 | 166331362 | 1.27E-06 | q32.3  | TMEM192        | intronic      |  |  |
| 8  | rs10095586 | 78887533  | 1.27E-06 | q21.12 |                |               |  |  |
| 11 | rs634416   | 117085025 | 1.27E-06 | q23.3  | DSCAML1        | intronic      |  |  |
| 12 | rs7302057  | 39469139  | 1.27E-06 | q12    | CNTN1          | intronic      |  |  |
| 12 | rs6581959  | 39470317  | 1.27E-06 | q12    | CNTN1          | intronic      |  |  |
| 12 | rs1965340  | 67599196  | 1.27E-06 | q15    | CPM            | intronic      |  |  |
| 17 | rs9913935  | 25876414  | 1.27E-06 | q11.2  | GOSR1          | 3utr          |  |  |
| 17 | rs11650766 | 25886393  | 1.27E-06 | q11.2  | ALOX12P1       | intronic      |  |  |
| 17 | rs11653789 | 25892085  | 1.27E-06 | q11.2  | ALOX12P1       | intronic      |  |  |
| 17 | rs8081187  | 26040486  | 1.27E-06 | q11.2  |                |               |  |  |
| 1  | rs704787   | 39972441  | 1.48E-06 | p34.2  | PPIE           | intronic      |  |  |
| 2  | rs6756156  | 56285098  | 1.85E-06 | p16.1  | CCDC85A        | intronic      |  |  |
| 2  | rs6733298  | 56304360  | 1.85E-06 | p16.1  | CCDC85A        | intronic      |  |  |
| 2  | rs6545561  | 56310240  | 1.85E-06 | p16.1  | CCDC85A        | intronic      |  |  |
| 16 | rs17806253 | 23576791  | 1.88E-06 | p12.2  | DCTN5          | intronic      |  |  |
| 1  | rs347273   | 160584137 | 2.40E-06 | q23.3  | NOS1AP         | intronic      |  |  |
| 14 | rs1042897  | 99818376  | 2.60E-06 | q32.2  | YY1/AL157871.2 | 3utr/intronic |  |  |
| 7  | rs6972034  | 103804953 | 2.77E-06 | q22.2  | LHFPL3         | intronic      |  |  |
| 6  | rs12197404 | 107416824 | 2.80E-06 | q21    |                |               |  |  |
| 6  | rs9398330  | 113500683 | 2.80E-06 | q21    |                |               |  |  |
| 8  | rs1283703  | 108472658 | 2.98E-06 | q23.1  | ANGPT1         | intronic      |  |  |
| 12 | rs17680262 | 108838919 | 3.87E-06 | q24.11 | TCHP           | 3utr          |  |  |
| 18 | rs12963818 | 47283465  | 3.87E-06 | q21.2  | RP11_267C16.1  | intronic      |  |  |
| 2  | rs11676424 | 239338075 | 4.36E-06 | q37.3  |                |               |  |  |
| 12 | rs1444204  | 39369149  | 4.53E-06 | q12    |                |               |  |  |
| 12 | rs1584093  | 39408555  | 4.53E-06 | q12    | CNTN1          | intronic      |  |  |
| 23 | rs6629669  | 23454170  | 4.95E-06 | p22.11 |                |               |  |  |
| 12 | rs310803   | 75966542  | 5.04E-06 | q21.2  | E2F7           | intronic      |  |  |

|           |            |           |          |        |             |          |             |           |
|-----------|------------|-----------|----------|--------|-------------|----------|-------------|-----------|
| 4         | rs4308418  | 188450860 | 5.09E-06 | q35.2  |             |          |             |           |
| 2         | rs2869528  | 56312931  | 5.18E-06 | p16.1  | CCDC85A     | intronic |             |           |
| 2         | rs214047   | 56344184  | 5.18E-06 | p16.1  | CCDC85A     | intronic |             |           |
| 8         | rs17595454 | 18377451  | 5.72E-06 | p22    |             |          |             |           |
| 10        | rs10823960 | 53446370  | 5.80E-06 | q21.1  | PAX3        | intronic |             |           |
| 10        | rs12777779 | 127850057 | 5.98E-06 | q26.2  | ADAM12      | intronic |             |           |
| 2         | rs13413035 | 40189400  | 6.12E-06 | p22.1  | SLC8A1_AS1  | intronic |             |           |
| 2         | rs11679833 | 121023152 | 6.12E-06 | q14.2  |             |          |             |           |
| 3         | rs11921464 | 2220103   | 6.12E-06 | p26.3  | CNTN4       | intronic |             |           |
| 6         | rs3129727  | 32787668  | 6.12E-06 | p21.32 |             |          |             |           |
| 8         | rs11990353 | 118113463 | 6.12E-06 | q24.11 | SLC30A8     | intronic |             |           |
| 8         | rs16905064 | 135133983 | 6.12E-06 | q24.22 |             |          |             |           |
| 12        | rs2701815  | 126984005 | 6.12E-06 | q24.32 | LINC00507   | intronic |             |           |
| 12        | rs12812393 | 131026648 | 6.12E-06 | q24.33 | EP400       | intronic |             |           |
| 23        | rs4459029  | 67773144  | 6.12E-06 | q13.1  |             |          |             |           |
| 20        | rs2427386  | 60794328  | 6.27E-06 | q13.33 |             |          |             |           |
| 7         | rs16873582 | 138246541 | 6.34E-06 | q34    | KIAA1549    | coding   | 1012        | S>S       |
| 5         | rs10042047 | 125338510 | 7.18E-06 | q23.2  |             |          |             |           |
| 9         | rs16921254 | 103885104 | 7.18E-06 | q31.1  |             |          |             |           |
| 17        | rs2314640  | 9242675   | 8.06E-06 | p13.1  | STX8        | intronic |             |           |
| 23        | rs6648168  | 72391114  | 8.25E-06 | q13.2  |             |          |             |           |
| 2         | rs7426302  | 231237153 | 8.92E-06 | q37.1  |             |          |             |           |
| 22        | rs6519702  | 25883046  | 9.39E-06 | q12.1  | CTA-992D9.7 | intronic |             |           |
| 7         | rs10281008 | 27844062  | 9.66E-06 | p15.2  | JAZF1       | intronic |             |           |
| 9         | rs10970527 | 31781211  | 9.73E-06 | p21.1  |             |          |             |           |
| 8         | rs1584220  | 117997118 | 9.87E-06 | q24.11 |             |          |             |           |
| 8         | rs17744529 | 118000035 | 9.87E-06 | q24.11 |             |          |             |           |
| 8         | rs4319130  | 118002365 | 9.87E-06 | q24.11 |             |          |             |           |
|           |            |           |          |        |             |          |             |           |
| Nonverbal |            |           |          |        |             |          |             |           |
| CHR       | SNP        | BP        | P        | Band   | Genes       | Role     | aa Position | aa Change |
| 2         | rs12987781 | 203078111 | 6.96E-11 | q33.2  | BMP2        | intronic |             |           |

|    |            |           |          |        |            |                     |     |     |
|----|------------|-----------|----------|--------|------------|---------------------|-----|-----|
| 2  | rs17199249 | 203134913 | 6.96E-11 | q33.2  | BMPR2      | 3utr                |     |     |
| 2  | rs2138380  | 202877469 | 6.96E-11 | q33.1  | NOP58      | 3downstream         |     |     |
| 2  | rs2350807  | 203004035 | 6.96E-11 | q33.1  | BMPR2      | intronic            |     |     |
| 2  | rs6545561  | 56310240  | 3.50E-08 | p16.1  | CCDC85A    | intronic            |     |     |
| 2  | rs6733298  | 56304360  | 3.50E-08 | p16.1  | CCDC85A    | intronic            |     |     |
| 2  | rs6756156  | 56285098  | 3.50E-08 | p16.1  | CCDC85A    | intronic            |     |     |
| 9  | rs6479471  | 95084239  | 5.27E-08 | q22.31 | WNK2       | intronic            |     |     |
| 9  | rs7022051  | 95042804  | 5.27E-08 | q22.31 | WNK2       | intronic            |     |     |
| 23 | rs1128863  | 154010056 | 6.69E-08 | q28    | MTCP1      | intronic            |     |     |
| 5  | rs17097187 | 140692037 | 6.69E-08 | q31.3  | PCDHGA1    | coding              | 534 | A>A |
| 23 | rs237536   | 142819240 | 6.69E-08 | q27.3  |            |                     |     |     |
| 23 | rs5909473  | 18329671  | 6.69E-08 | p22.13 |            |                     |     |     |
| 22 | rs6005657  | 26565087  | 1.09E-07 | q12.1  |            |                     |     |     |
| 6  | rs11753940 | 64500431  | 1.10E-07 | q12    | EYS        | intronic            |     |     |
| 19 | rs11882691 | 36774875  | 1.10E-07 | q12    | THEG5      | Supstream/intronic  |     |     |
| 4  | rs16895825 | 17435354  | 1.10E-07 | p15.31 | NCAPG      | non-coding intronic |     |     |
| 4  | rs16895939 | 17488259  | 1.10E-07 | p15.31 | LCORL      | intronic            |     |     |
| 12 | rs17041392 | 107206906 | 1.10E-07 | q23.3  | CMKLR1     | 3utr                |     |     |
| 4  | rs17051351 | 122562025 | 1.10E-07 | q27    |            |                     |     |     |
| 7  | rs17148818 | 24122943  | 1.10E-07 | p15.3  |            |                     |     |     |
| 3  | rs17526839 | 25580105  | 1.10E-07 | p24.2  | RARB       | intronic            |     |     |
| 7  | rs3025153  | 24226447  | 1.10E-07 | p15.3  | AC004485.3 | non-coding intronic |     |     |
| 2  | rs3914642  | 45257987  | 1.10E-07 | p21    | LINC01121  | non-coding intronic |     |     |
| 3  | rs6782829  | 136438993 | 1.10E-07 | q22.2  | EPHB1      | intronic            |     |     |
| 4  | rs7690457  | 17414477  | 1.10E-07 | p15.31 | DCAF16     | coding              | 129 | T>I |
| 7  | rs10224816 | 9678184   | 1.12E-07 | p21.3  |            |                     |     |     |
| 5  | rs13169647 | 41468881  | 1.57E-07 | p13.1  | PLCXD3     | intronic            |     |     |
| 4  | rs1355161  | 126487591 | 1.73E-07 | q28.1  | FAT4       | intronic            |     |     |
| 11 | rs12804520 | 83368254  | 1.88E-07 | q14.1  | DLG2       | intronic            |     |     |
| 11 | rs2242312  | 129780556 | 1.88E-07 | q24.3  | ADAMTS8    | 3utr                |     |     |
| 10 | rs772822   | 80304750  | 1.99E-07 | q22.3  |            |                     |     |     |
| 12 | rs12812815 | 85758126  | 3.89E-07 | q21.32 | MGAT4C     | 5upstream           |     |     |

|    |            |           |          |        |               |                     |  |  |
|----|------------|-----------|----------|--------|---------------|---------------------|--|--|
| 2  | rs11676424 | 239338075 | 5.14E-07 | q37.3  |               |                     |  |  |
| 2  | rs10498133 | 222812549 | 6.31E-07 | q36.1  | PAX3          | intronic            |  |  |
| 8  | rs16868879 | 103095400 | 6.31E-07 | q22.3  | NCALD         | intronic            |  |  |
| 5  | rs16902290 | 34522293  | 6.31E-07 | p13.2  |               |                     |  |  |
| 4  | rs17005123 | 82534494  | 6.31E-07 | q21.21 |               |                     |  |  |
| 6  | rs17287803 | 42039979  | 6.31E-07 | p21.1  | CCND3         | intronic            |  |  |
| 14 | rs1957173  | 45476666  | 6.31E-07 | q21.2  |               |                     |  |  |
| 18 | rs236035   | 6320209   | 6.31E-07 | p11.31 | L3MBTL4       | intronic            |  |  |
| 2  | rs384180   | 6483994   | 6.31E-07 | p25.2  |               |                     |  |  |
| 18 | rs401127   | 6305088   | 6.31E-07 | p11.31 | L3MBTL4       | intronic            |  |  |
| 12 | rs7135813  | 85718641  | 6.31E-07 | q21.32 | MGAT4C        | intronic            |  |  |
| 2  | rs6728727  | 165977043 | 6.93E-07 | q24.3  |               |                     |  |  |
| 4  | rs17005129 | 82543901  | 7.68E-07 | q21.21 |               |                     |  |  |
| 17 | rs9897203  | 59960605  | 7.68E-07 | q23.3  | CEP95         | intronic            |  |  |
| 22 | rs6519702  | 25883046  | 8.09E-07 | q12.1  | CTA-992D9.7   | non-coding intronic |  |  |
| 18 | rs7232149  | 10937468  | 8.71E-07 | p11.21 | PIEZO2        | intronic            |  |  |
| 18 | rs9952954  | 10939093  | 8.71E-07 | p11.21 | PIEZO2        | intronic            |  |  |
| 2  | rs7426302  | 231237153 | 8.74E-07 | q37.1  |               |                     |  |  |
| 9  | rs7857220  | 95064873  | 8.75E-07 | q22.31 | WNK2          | intronic            |  |  |
| 9  | rs7874101  | 95031716  | 9.95E-07 | q22.31 | WNK2          | intronic            |  |  |
| 9  | rs12216907 | 78225879  | 1.24E-06 | q21.13 | RP11-66C24.1  | 3downstream         |  |  |
| 9  | rs12216907 | 78225879  | 1.24E-06 | q21.13 | GCNT1         | non-coding intronic |  |  |
| 5  | rs7444875  | 34520901  | 1.29E-06 | p13.2  |               |                     |  |  |
| 3  | rs17564921 | 148372345 | 1.63E-06 | q24    | RP11-649A16.1 | non-coding intronic |  |  |
| 8  | rs11984453 | 4491939   | 1.67E-06 | p23.2  | CSMD1         | intronic            |  |  |
| 5  | rs17211823 | 128158012 | 1.67E-06 | q23.3  | SLC27A6       | intronic            |  |  |
| 23 | rs6629669  | 23454170  | 1.80E-06 | p22.11 |               |                     |  |  |
| 10 | rs497204   | 80306297  | 1.89E-06 | q22.3  |               |                     |  |  |
| 2  | rs11883890 | 231230076 | 1.94E-06 | q37.1  |               |                     |  |  |
| 9  | rs10992681 | 95018086  | 2.21E-06 | q22.31 | WNK2          | intronic            |  |  |
| 11 | rs7123143  | 80683168  | 2.42E-06 | q14.1  |               |                     |  |  |
| 2  | rs7423933  | 56269275  | 2.44E-06 | p16.1  | CCDC85A       | intronic            |  |  |

|             |            |           |          |             |               |                     |                    |                  |
|-------------|------------|-----------|----------|-------------|---------------|---------------------|--------------------|------------------|
| 22          | rs17806754 | 32417553  | 2.85E-06 | q12.3       | LARGE         | intronic            |                    |                  |
| 7           | rs10263571 | 15421858  | 3.25E-06 | p21.2       | AGMO          | intronic            |                    |                  |
| 7           | rs4721438  | 15422074  | 3.25E-06 | p21.2       | AGMO          | intronic            |                    |                  |
| 4           | rs11098654 | 123128865 | 4.68E-06 | q27         |               |                     |                    |                  |
| 2           | rs1437871  | 197540123 | 4.68E-06 | q33.1       | ANKRD44       | 3utr                |                    |                  |
| 3           | rs17195143 | 25042378  | 4.68E-06 | p24.2       | RNA5SP125     | 3downstream         |                    |                  |
| 3           | rs17195143 | 25042378  | 4.68E-06 | p24.2       | AC133680.1    | non-coding intronic |                    |                  |
| 2           | rs2376103  | 139430374 | 4.68E-06 | q22.1       |               |                     |                    |                  |
| 2           | rs4954642  | 139425722 | 4.68E-06 | q22.1       |               |                     |                    |                  |
| 13          | rs1475201  | 44347321  | 4.88E-06 | q14.12      |               |                     |                    |                  |
| 1           | rs1854077  | 199819461 | 4.88E-06 | q32.1       |               |                     |                    |                  |
| 3           | rs2314042  | 155736835 | 4.88E-06 | q25.2       | RP11-656A15.1 | non-coding intronic |                    |                  |
| 11          | rs4567442  | 42610618  | 4.88E-06 | p12         |               |                     |                    |                  |
| 3           | rs7636993  | 36421322  | 4.88E-06 | p22.3       | STAC          | intronic            |                    |                  |
| 4           | rs2342654  | 156369261 | 4.98E-06 | q32.1       |               |                     |                    |                  |
| 2           | rs7559811  | 231231148 | 5.61E-06 | q37.1       |               |                     |                    |                  |
| 18          | rs8084568  | 57190720  | 6.31E-06 | q21.33      | CDH20         | intronic            |                    |                  |
| 17          | rs4387653  | 68659971  | 6.57E-06 | q25.1       |               |                     |                    |                  |
| 20          | rs17805193 | 59138980  | 6.71E-06 | q13.33      |               |                     |                    |                  |
| 2           | rs1861773  | 56256352  | 6.99E-06 | p16.1       | AC007743.1    | non-coding          |                    |                  |
| 2           | rs1861773  | 56256352  | 6.99E-06 | p16.1       | RP11-481J13.1 | non-coding intronic |                    |                  |
| 3           | rs10935663 | 148442795 | 8.98E-06 | q24         | RP11-649A16.1 | non-coding intronic |                    |                  |
| 9           | rs16928804 | 128033773 | 9.32E-06 | q33.3       |               |                     |                    |                  |
| 7           | rs4719155  | 70745160  | 9.55E-06 | q11.22      | WBSCR17       | intronic            |                    |                  |
| 6           | rs6454694  | 89230477  | 9.87E-06 | q15         |               |                     |                    |                  |
| 13          | rs1220582  | 23639868  | 9.90E-06 | q12.12      | SPATA13       | intronic            |                    |                  |
| 9           | rs7025467  | 137199567 | 9.90E-06 | q34.3       |               |                     |                    |                  |
| 4           | rs1465039  | 123187512 | 9.96E-06 | q27         |               |                     |                    |                  |
| 4           | rs1965582  | 123167389 | 9.96E-06 | q27         |               |                     |                    |                  |
|             |            |           |          |             |               |                     |                    |                  |
| <b>Play</b> |            |           |          |             |               |                     |                    |                  |
| <b>CHR</b>  | <b>SNP</b> | <b>BP</b> | <b>P</b> | <b>Band</b> | <b>Genes</b>  | <b>Role</b>         | <b>aa Position</b> | <b>aa Change</b> |

|    |            |           |          |        |            |                     |  |  |
|----|------------|-----------|----------|--------|------------|---------------------|--|--|
| 2  | rs12987781 | 203078111 | 5.76E-11 | q33.2  | BMPR2      | intronic            |  |  |
| 2  | rs17199249 | 203134913 | 5.76E-11 | q33.2  | BMPR2      | 3utr                |  |  |
| 2  | rs2138380  | 202877469 | 5.76E-11 | q33.1  | NOP58      | 3downstream         |  |  |
| 2  | rs2350807  | 203004035 | 5.76E-11 | q33.1  | BMPR2      | intronic            |  |  |
| 2  | rs6545561  | 56310240  | 1.50E-10 | p16.1  | CCDC85A    | intronic            |  |  |
| 2  | rs6733298  | 56304360  | 1.50E-10 | p16.1  | CCDC85A    | intronic            |  |  |
| 2  | rs6756156  | 56285098  | 1.50E-10 | p16.1  | CCDC85A    | intronic            |  |  |
| 11 | rs7123143  | 80683168  | 3.10E-09 | q14.1  |            |                     |  |  |
| 2  | rs11676424 | 239338075 | 9.75E-09 | q37.3  |            |                     |  |  |
| 2  | rs11673727 | 239311421 | 4.00E-08 | q37.3  | AC113618.1 | non-coding intronic |  |  |
| 3  | rs4488776  | 196013731 | 4.00E-08 | q29    |            |                     |  |  |
| 2  | rs17356755 | 183290415 | 5.97E-08 | q32.1  | DNAJC10    | non-coding intronic |  |  |
| 12 | rs12812815 | 85758126  | 1.10E-07 | q21.32 | MGAT4C     | 5upstream           |  |  |
| 4  | rs1391758  | 54429268  | 1.30E-07 | q12    | FIP1L1     | intronic            |  |  |
| 20 | rs4809499  | 60788088  | 1.30E-07 | q13.33 | SLCO4A1    | 3downstream         |  |  |
| 10 | rs772822   | 80304750  | 1.30E-07 | q22.3  |            |                     |  |  |
| 13 | rs2876807  | 61019136  | 2.11E-07 | q21.2  |            |                     |  |  |
| 5  | rs13169647 | 41468881  | 2.22E-07 | p13.1  | PLCXD3     | intronic            |  |  |
| 5  | rs10474916 | 11346094  | 2.68E-07 | p15.2  | CTNND2     | intronic            |  |  |
| 3  | rs2673505  | 21845421  | 3.62E-07 | p24.3  | AC023798.1 | 5upstream           |  |  |
| 3  | rs2673505  | 21845421  | 3.62E-07 | p24.3  | ZNF385D    | non-coding intronic |  |  |
| 3  | rs2673529  | 21852365  | 3.62E-07 | p24.3  | ZNF385D    | non-coding intronic |  |  |
| 3  | rs1471659  | 128295267 | 4.03E-07 | q21.3  |            |                     |  |  |
| 21 | rs9978194  | 34176163  | 4.04E-07 | q22.11 | ITSN1      | intronic            |  |  |
| 6  | rs11753940 | 64500431  | 5.11E-07 | q12    | EYS        | intronic            |  |  |
| 19 | rs11882691 | 36774875  | 5.11E-07 | q12    | THEG5      | intronic            |  |  |
| 4  | rs16895825 | 17435354  | 5.11E-07 | p15.31 | NCAPG      | intronic            |  |  |
| 4  | rs16895939 | 17488259  | 5.11E-07 | p15.31 | LCORL      | intronic            |  |  |
| 12 | rs17041392 | 107206906 | 5.11E-07 | q23.3  | CMKLR1     | 3utr                |  |  |
| 4  | rs17051351 | 122562025 | 5.11E-07 | q27    |            |                     |  |  |
| 7  | rs17148818 | 24122943  | 5.11E-07 | p15.3  |            |                     |  |  |
| 3  | rs17526839 | 25580105  | 5.11E-07 | p24.2  | RARB       | intronic            |  |  |

|    |            |           |          |        |                     |                     |     |     |
|----|------------|-----------|----------|--------|---------------------|---------------------|-----|-----|
| 7  | rs3025153  | 24226447  | 5.11E-07 | p15.3  | AC004485.3          | non-coding intronic |     |     |
| 2  | rs3914642  | 45257987  | 5.11E-07 | p21    | LINC01121           | non-coding intronic |     |     |
| 3  | rs6782829  | 136438993 | 5.11E-07 | q22.2  | EPHB1               | intronic            |     |     |
| 4  | rs7690457  | 17414477  | 5.11E-07 | p15.31 | DCAF16              | coding              | 129 | T>I |
| 9  | rs10989224 | 102525990 | 5.70E-07 | q31.1  |                     |                     |     |     |
| 17 | rs2676801  | 45048685  | 5.82E-07 | q21.33 | SPOP                | intronic            |     |     |
| 17 | rs4794061  | 45131084  | 5.82E-07 | q21.33 |                     |                     |     |     |
| 2  | rs2216328  | 56260472  | 5.89E-07 | p16.1  | non-coding intronic |                     |     |     |
| 2  | rs2216328  | 56260472  | 5.89E-07 | p16.1  | AC007743.1          | non-coding          |     |     |
| 3  | rs17035408 | 36662904  | 6.15E-07 | p22.2  |                     |                     |     |     |
| 23 | rs1128863  | 154010056 | 6.17E-07 | q28    | MTCP1               | non-coding intronic |     |     |
| 5  | rs17097187 | 140692037 | 6.17E-07 | q31.3  | PCDHGA1             | coding              | 534 | A>A |
| 23 | rs237536   | 142819240 | 6.17E-07 | q27.3  |                     |                     |     |     |
| 23 | rs5909473  | 18329671  | 6.17E-07 | p22.13 |                     |                     |     |     |
| 2  | rs10498133 | 222812549 | 6.40E-07 | q36.1  | PAX3                | intronic            |     |     |
| 1  | rs12064875 | 108006971 | 6.40E-07 | p13.3  | VAV3                | intronic            |     |     |
| 1  | rs12563935 | 230263968 | 6.40E-07 | q42.2  |                     |                     |     |     |
| 7  | rs1636410  | 148725957 | 6.40E-07 | q36.1  | AC004941.3          | 5upstream           |     |     |
| 1  | rs16856351 | 230247195 | 6.40E-07 | q42.2  |                     |                     |     |     |
| 1  | rs16856377 | 230258335 | 6.40E-07 | q42.2  |                     |                     |     |     |
| 8  | rs16868879 | 103095400 | 6.40E-07 | q22.3  | NCALD               | intronic            |     |     |
| 5  | rs16880156 | 52084715  | 6.40E-07 | q11.2  | CTD-228808.1        | non-coding intronic |     |     |
| 5  | rs16902290 | 34522293  | 6.40E-07 | p13.2  |                     |                     |     |     |
| 4  | rs17005123 | 82534494  | 6.40E-07 | q21.21 |                     |                     |     |     |
| 4  | rs17046561 | 166639887 | 6.40E-07 | q32.3  | CPE                 | 3downstream         |     |     |
| 6  | rs17287803 | 42039979  | 6.40E-07 | p21.1  | CCND3               | intronic            |     |     |
| 19 | rs17706051 | 12345585  | 6.40E-07 | p13.2  | CTD-3105H18.5       | 3downstream         |     |     |
| 14 | rs1957173  | 45476666  | 6.40E-07 | q21.2  |                     |                     |     |     |
| 18 | rs236035   | 6320209   | 6.40E-07 | p11.31 | L3MBTL4             | intronic            |     |     |
| 5  | rs2879468  | 171739982 | 6.40E-07 | q35.1  | SH3PXD2B            | intronic            |     |     |
| 5  | rs3777105  | 139230428 | 6.40E-07 | q31.2  | NRG2                | intronic            |     |     |
| 4  | rs3810840  | 41816531  | 6.40E-07 | p13    | BEND4               | intronic            |     |     |



|    |            |           |          |        |                |                     |  |  |
|----|------------|-----------|----------|--------|----------------|---------------------|--|--|
| 2  | rs384180   | 6483994   | 6.40E-07 | p25.2  |                |                     |  |  |
| 2  | rs3893079  | 85192530  | 6.40E-07 | p11.2  |                |                     |  |  |
| 18 | rs401127   | 6305088   | 6.40E-07 | p11.31 | L3MBTL4        | intronic            |  |  |
| 17 | rs4968211  | 7399786   | 6.40E-07 | p13.1  | TNFSF12_TNFSF1 | intronic            |  |  |
| 12 | rs7135813  | 85718641  | 6.40E-07 | q21.32 | MGAT4C         | intronic            |  |  |
| 1  | rs7537301  | 107998682 | 6.40E-07 | p13.3  | VAV3           | intronic            |  |  |
| 15 | rs8042040  | 86729196  | 6.40E-07 | q25.3  |                |                     |  |  |
| 17 | rs8079544  | 7520777   | 6.40E-07 | p13.1  | TP53           | intronic            |  |  |
| 6  | rs9355427  | 163699662 | 6.40E-07 | q26    |                |                     |  |  |
| 13 | rs9536258  | 52197146  | 6.40E-07 | q14.3  | LECT1          | intronic            |  |  |
| 1  | rs9727625  | 230261992 | 6.40E-07 | q42.2  |                |                     |  |  |
| 6  | rs12197404 | 107416824 | 6.90E-07 | q21    |                |                     |  |  |
| 3  | rs2314042  | 155736835 | 6.90E-07 | q25.2  | RP11-656A15.1  | non-coding intronic |  |  |
| 7  | rs2526413  | 25060830  | 6.90E-07 | p15.3  |                |                     |  |  |
| 4  | rs282241   | 64889184  | 6.90E-07 | q13.1  | TECRL          | intronic            |  |  |
| 11 | rs4567442  | 42610618  | 6.90E-07 | p12    |                |                     |  |  |
| 6  | rs9398330  | 113500683 | 6.90E-07 | q21    |                |                     |  |  |
| 4  | rs965016   | 64876557  | 6.90E-07 | q13.1  | TECRL          | intronic            |  |  |
| 4  | rs11098654 | 123128865 | 7.48E-07 | q27    |                |                     |  |  |
| 8  | rs11984453 | 4491939   | 7.51E-07 | p23.2  | CSMD1          | intronic            |  |  |
| 3  | rs2323206  | 74033842  | 7.79E-07 | p13    | RP11-20B7.1    | non-coding intronic |  |  |
| 4  | rs1355161  | 126487591 | 7.88E-07 | q28.1  | FAT4           | intronic            |  |  |
| 8  | rs17468779 | 18835962  | 8.26E-07 | p22    | PSD3           | intronic            |  |  |
| 2  | rs10490706 | 19355330  | 9.30E-07 | p24.1  | AC092594.1     | non-coding intronic |  |  |
| 11 | rs10891973 | 115793119 | 9.40E-07 | q23.3  |                |                     |  |  |
| 11 | rs11823029 | 115788726 | 9.40E-07 | q23.3  |                |                     |  |  |
| 9  | rs10970527 | 31781211  | 1.06E-06 | p21.1  |                |                     |  |  |
| 13 | rs12874087 | 67683706  | 1.29E-06 | q21.33 |                |                     |  |  |
| 9  | rs16928804 | 128033773 | 1.36E-06 | q33.3  |                |                     |  |  |
| 6  | rs853884   | 36576111  | 1.36E-06 | p21.31 | STK38          | intronic            |  |  |
| 20 | rs17805193 | 59138980  | 1.41E-06 | q13.33 |                |                     |  |  |
| 20 | rs2427386  | 60794328  | 1.46E-06 | q13.33 |                |                     |  |  |

|    |            |           |          |        |             |                     |     |     |
|----|------------|-----------|----------|--------|-------------|---------------------|-----|-----|
| 2  | rs7426302  | 231237153 | 1.46E-06 | q37.1  |             |                     |     |     |
| 3  | rs9869897  | 74035041  | 1.67E-06 | p13    | RP11-20B7.1 | 3downstream         |     |     |
| 7  | rs12539762 | 136175466 | 1.71E-06 | q33    | hsa-mir-490 | non-coding intronic |     |     |
| 7  | rs12539762 | 136175466 | 1.71E-06 | q33    | snoU13      | 3downstream         |     |     |
| 16 | rs17325839 | 56234402  | 1.72E-06 | q21    | GPR56       | intronic            |     |     |
| 23 | rs6629669  | 23454170  | 1.85E-06 | p22.11 |             |                     |     |     |
| 2  | rs11883890 | 231230076 | 1.94E-06 | q37.1  |             |                     |     |     |
| 2  | rs214047   | 56344184  | 2.11E-06 | p16.1  | CCDC85A     | intronic            |     |     |
| 2  | rs2869528  | 56312931  | 2.11E-06 | p16.1  | CCDC85A     | intronic            |     |     |
| 17 | rs11655629 | 76524437  | 2.16E-06 | q25.3  | RPTOR       | intronic            |     |     |
| 1  | rs2255340  | 230002773 | 2.21E-06 | q42.2  | DISC1       | intronic            |     |     |
| 1  | rs2255340  | 230002773 | 2.21E-06 | q42.2  | TSNAX_DISC1 | non-coding intronic |     |     |
| 9  | rs880403   | 80616009  | 2.36E-06 | q21.31 |             |                     |     |     |
| 9  | rs10970502 | 31704812  | 2.37E-06 | p21.1  |             |                     |     |     |
| 11 | rs11219032 | 122527802 | 2.37E-06 | q24.1  | CLMP        | intronic            |     |     |
| 1  | rs1555026  | 23759792  | 2.37E-06 | p36.12 | ID3         | 5upstream           |     |     |
| 1  | rs877518   | 23767741  | 2.37E-06 | p36.12 |             |                     |     |     |
| 14 | rs12897976 | 102962763 | 2.91E-06 | q32.32 | MARK3       | intronic            |     |     |
| 15 | rs12915554 | 30810778  | 2.91E-06 | q13.3  | GREM1       | 3utr                |     |     |
| 11 | rs2040339  | 126346829 | 2.98E-06 | q24.2  | KIRREL3     | intronic            |     |     |
| 16 | rs9928941  | 53302769  | 2.99E-06 | q12.2  |             |                     |     |     |
| 1  | rs11118119 | 216760495 | 3.03E-06 | q41    | C1orf143    | intronic            |     |     |
| 1  | rs6691685  | 216753628 | 3.03E-06 | q41    | C1orf143    | intronic            |     |     |
| 2  | rs472161   | 30783669  | 3.28E-06 | p23.1  |             |                     |     |     |
| 22 | rs17806754 | 32417553  | 3.42E-06 | q12.3  | LARGE       | intronic            |     |     |
| 18 | rs11877750 | 68072361  | 3.46E-06 | q22.3  |             |                     |     |     |
| 2  | rs13028485 | 174213170 | 3.46E-06 | q31.1  |             |                     |     |     |
| 11 | rs7109274  | 59476992  | 3.46E-06 | q12.1  |             |                     |     |     |
| 2  | rs6707044  | 19354240  | 3.53E-06 | p24.1  | AC092594.1  | non-coding intronic |     |     |
| 12 | rs310830   | 75943724  | 3.67E-06 | q21.2  | E2F7        | coding              | 770 | S>S |
| 14 | rs765247   | 72261487  | 3.67E-06 | q24.2  | DPF3        | intronic            |     |     |
| 7  | rs3094974  | 22451012  | 3.78E-06 | p15.3  | STEAP1B     | intronic            |     |     |

|    |            |           |          |        |              |                     |  |  |
|----|------------|-----------|----------|--------|--------------|---------------------|--|--|
| 4  | rs1465039  | 123187512 | 3.99E-06 | q27    |              |                     |  |  |
| 4  | rs1965582  | 123167389 | 3.99E-06 | q27    |              |                     |  |  |
| 4  | rs6554133  | 54391163  | 4.44E-06 | q12    | FIP1L1       | intronic            |  |  |
| 1  | rs17103311 | 79746027  | 4.53E-06 | p31.1  |              |                     |  |  |
| 1  | rs3015045  | 79625651  | 4.53E-06 | p31.1  |              |                     |  |  |
| 1  | rs6665036  | 79638798  | 4.53E-06 | p31.1  |              |                     |  |  |
| 1  | rs6686663  | 79607654  | 4.53E-06 | p31.1  |              |                     |  |  |
| 2  | rs7423933  | 56269275  | 4.67E-06 | p16.1  | CCDC85A      | intronic            |  |  |
| 8  | rs1445564  | 82044517  | 4.75E-06 | q21.13 | PAG1         | 3utr                |  |  |
| 1  | rs6667629  | 10447054  | 4.79E-06 | p36.22 | DFFA         | intronic            |  |  |
| 15 | rs1520459  | 44730699  | 4.84E-06 | q21.1  |              |                     |  |  |
| 1  | rs16854967 | 229985969 | 4.84E-06 | q42.2  | DISC1        | intronic            |  |  |
| 1  | rs16854967 | 229985969 | 4.84E-06 | q42.2  | TSNAX_DISC1  | non-coding intronic |  |  |
| 5  | rs585991   | 17246633  | 4.84E-06 | p15.1  | AC091878.1   | non-coding intronic |  |  |
| 2  | rs6432082  | 10331342  | 5.59E-06 | p25.1  |              |                     |  |  |
| 11 | rs10840415 | 10421488  | 5.68E-06 | p15.4  | AMPD3        | intronic            |  |  |
| 19 | rs10412551 | 51605589  | 5.95E-06 | q13.32 | CCDC8        | 3utr                |  |  |
| 16 | rs1801255  | 56247306  | 5.98E-06 | q21    | GPR56        | coding              |  |  |
| 1  | rs770713   | 5683616   | 6.01E-06 | p36.31 |              |                     |  |  |
| 6  | rs9387090  | 113062327 | 6.01E-06 | q21    |              |                     |  |  |
| 13 | rs7991325  | 113127674 | 6.98E-06 | q34    | ADPRHL1      | intronic            |  |  |
| 9  | rs12216907 | 78225879  | 7.34E-06 | q21.13 | RP11-66C24.1 | 3downstream         |  |  |
| 9  | rs12216907 | 78225879  | 7.34E-06 | q21.13 | GCNT1        | non-coding intronic |  |  |
| 7  | rs10224816 | 9678184   | 7.36E-06 | p21.3  |              |                     |  |  |
| 5  | rs7444875  | 34520901  | 7.41E-06 | p13.2  |              |                     |  |  |
| 22 | rs4820778  | 26564347  | 7.43E-06 | q12.1  |              |                     |  |  |
| 22 | rs6005657  | 26565087  | 7.46E-06 | q12.1  |              |                     |  |  |
| 13 | rs17087794 | 70445442  | 7.64E-06 | q21.33 |              |                     |  |  |
| 13 | rs1475201  | 44347321  | 7.77E-06 | q14.12 |              |                     |  |  |
| 3  | rs7636993  | 36421322  | 7.77E-06 | p22.3  | STAC         | intronic            |  |  |
| 17 | rs7216649  | 47522839  | 8.48E-06 | q21.33 | CA10         | intronic            |  |  |
| 16 | rs12931123 | 86027384  | 8.63E-06 | q24.2  | ZCCHC14      | intronic            |  |  |

| 9             | rs6479471  | 95084239  | 8.63E-06 | q22.31 | WNK2       | intronic            |             |           |
|---------------|------------|-----------|----------|--------|------------|---------------------|-------------|-----------|
| 9             | rs7022051  | 95042804  | 8.63E-06 | q22.31 | WNK2       | intronic            |             |           |
| 2             | rs1437871  | 197540123 | 8.68E-06 | q33.1  | ANKRD44    | 3utr                |             |           |
| 3             | rs17195143 | 25042378  | 8.68E-06 | p24.2  | RNA5SP125  | 3downstream         |             |           |
| 3             | rs17195143 | 25042378  | 8.68E-06 | p24.2  | AC133680.1 | non-coding intronic |             |           |
| 9             | rs7875828  | 102499688 | 8.72E-06 | q31.1  |            |                     |             |           |
| 7             | rs1362361  | 29476911  | 8.75E-06 | p14.3  | CHN2       | intronic            |             |           |
| 15            | rs1850348  | 44731046  | 8.93E-06 | q21.1  |            |                     |             |           |
| 15            | rs499567   | 44740689  | 8.93E-06 | q21.1  | RNU6-1014P | 3downstream         |             |           |
| 7             | rs10263571 | 15421858  | 9.02E-06 | p21.2  | AGMO       | intronic            |             |           |
| 6             | rs13192235 | 135388044 | 9.02E-06 | q23.3  | HBS1L      | intronic            |             |           |
| 7             | rs4721438  | 15422074  | 9.02E-06 | p21.2  | AGMO       | intronic            |             |           |
| 4             | rs1120767  | 126036233 | 9.07E-06 | q28.1  |            |                     |             |           |
| 11            | rs12804520 | 83368254  | 9.07E-06 | q14.1  | DLG2       | intronic            |             |           |
| 9             | rs1360433  | 3739196   | 9.07E-06 | p24.2  |            |                     |             |           |
| 11            | rs2242312  | 129780556 | 9.07E-06 | q24.3  | ADAMTS8    | 3utr                |             |           |
| 4             | rs7686429  | 126034105 | 9.07E-06 | q28.1  |            |                     |             |           |
| 12            | rs1479449  | 23733078  | 9.63E-06 | p12.1  | SOX5       | intronic            |             |           |
| 2             | rs11690021 | 239301967 | 9.71E-06 | q37.3  | AC113618.1 | non-coding intronic |             |           |
| 4             | rs13126054 | 159348081 | 9.75E-06 | q32.1  | TMEM144    | intronic            |             |           |
| 4             | rs1928267  | 159362013 | 9.75E-06 | q32.1  | TMEM144    | intronic            |             |           |
| 16            | rs9302496  | 13271756  | 9.76E-06 | p13.12 | U91319.1   | non-coding intronic |             |           |
|               |            |           |          |        |            |                     |             |           |
| <b>Social</b> |            |           |          |        |            |                     |             |           |
| CHR           | SNP        | BP        | P        | Band   | Genes      | Role                | aa Position | aa Change |
| 23            | rs1128863  | 154010056 | 2.65E-11 | q28    | MTCP1      | non-coding intronic |             |           |
| 5             | rs17097187 | 140692037 | 2.65E-11 | q31.3  | PCDHGA1    | coding              | 534         | A>A       |
| 23            | rs237536   | 142819240 | 2.65E-11 | q27.3  |            |                     |             |           |
| 23            | rs5909473  | 18329671  | 2.65E-11 | p22.13 |            |                     |             |           |
| 2             | rs7426302  | 231237153 | 3.20E-11 | q37.1  |            |                     |             |           |
| 2             | rs12987781 | 203078111 | 1.75E-10 | q33.2  | BMPR2      | intronic            |             |           |
| 2             | rs17199249 | 203134913 | 1.75E-10 | q33.2  | BMPR2      | 3utr                |             |           |

|    |            |           |          |        |            |                     |     |     |
|----|------------|-----------|----------|--------|------------|---------------------|-----|-----|
| 2  | rs2138380  | 202877469 | 1.75E-10 | q33.1  | NOP58      | 3downstream         |     |     |
| 2  | rs2350807  | 203004035 | 1.75E-10 | q33.1  | BMP2R      | intronic            |     |     |
| 6  | rs11753940 | 64500431  | 3.58E-10 | q12    | EYS        | intronic            |     |     |
| 19 | rs11882691 | 36774875  | 3.58E-10 | q12    | THEG5      | Supstream           |     |     |
| 4  | rs16895825 | 17435354  | 3.58E-10 | p15.31 | NCAPG      | intronic            |     |     |
| 4  | rs16895939 | 17488259  | 3.58E-10 | p15.31 | LCORL      | intronic            |     |     |
| 12 | rs17041392 | 107206906 | 3.58E-10 | q23.3  | CMKLR1     | 3utr                |     |     |
| 4  | rs17051351 | 122562025 | 3.58E-10 | q27    |            |                     |     |     |
| 7  | rs17148818 | 24122943  | 3.58E-10 | p15.3  |            |                     |     |     |
| 3  | rs17526839 | 25580105  | 3.58E-10 | p24.2  | RARB       | non-coding intronic |     |     |
| 7  | rs3025153  | 24226447  | 3.58E-10 | p15.3  | AC004485.3 | non-coding intronic |     |     |
| 2  | rs3914642  | 45257987  | 3.58E-10 | p21    | LINC01121  | non-coding intronic |     |     |
| 3  | rs6782829  | 136438993 | 3.58E-10 | q22.2  | EPHB1      | intronic            |     |     |
| 4  | rs7690457  | 17414477  | 3.58E-10 | p15.31 | DCAF16     | coding              | 129 | T>I |
| 5  | rs13169647 | 41468881  | 6.02E-10 | p13.1  | PLCXD3     | intronic            |     |     |
| 4  | rs1355161  | 126487591 | 6.48E-10 | q28.1  | FAT4       | intronic            |     |     |
| 2  | rs11883890 | 231230076 | 7.17E-10 | q37.1  |            |                     |     |     |
| 11 | rs12804520 | 83368254  | 8.27E-10 | q14.1  | DLG2       | intronic            |     |     |
| 11 | rs2242312  | 129780556 | 8.27E-10 | q24.3  | ADAMTS8    | 3utr                |     |     |
| 7  | rs10263571 | 15421858  | 9.26E-10 | p21.2  | AGMO       | intronic            |     |     |
| 7  | rs4721438  | 15422074  | 9.26E-10 | p21.2  | AGMO       | intronic            |     |     |
| 9  | rs12216907 | 78225879  | 6.37E-09 | q21.13 | GCNT1      | intronic            |     |     |
| 10 | rs772822   | 80304750  | 3.38E-08 | q22.3  |            |                     |     |     |
| 18 | rs7232149  | 10937468  | 4.98E-08 | p11.21 | PIEZO2     | intronic            |     |     |
| 18 | rs9952954  | 10939093  | 4.98E-08 | p11.21 | PIEZO2     | intronic            |     |     |
| 13 | rs1220582  | 23639868  | 5.01E-08 | q12.12 | SPATA13    | intronic            |     |     |
| 9  | rs7025467  | 137199567 | 5.01E-08 | q34.3  |            |                     |     |     |
| 2  | rs11886946 | 21159092  | 1.09E-07 | p24.1  |            |                     |     |     |
| 4  | rs992253   | 89018302  | 1.09E-07 | q22.1  |            |                     |     |     |
| 8  | rs11984453 | 4491939   | 1.25E-07 | p23.2  | CSMD1      | intronic            |     |     |
| 2  | rs7559811  | 231231148 | 1.72E-07 | q37.1  |            |                     |     |     |
| 13 | rs4145640  | 58077348  | 1.73E-07 | q21.1  |            |                     |     |     |

|    |            |           |          |        |               |                       |     |     |
|----|------------|-----------|----------|--------|---------------|-----------------------|-----|-----|
| 6  | rs1000308  | 26352559  | 1.77E-07 | p22.2  |               |                       |     |     |
| 6  | rs1341758  | 26308497  | 1.77E-07 | p22.2  | HIST1H2BF     | 3downstream/5upstream |     |     |
| 6  | rs16891458 | 26342455  | 1.77E-07 | p22.2  | HIST1H1D      | 3utr                  |     |     |
| 6  | rs6913828  | 26354643  | 1.77E-07 | p22.2  | HIST1H4G      | 3downstream           |     |     |
| 6  | rs989710   | 26314053  | 1.77E-07 | p22.2  | HIST1H4E      | 3downstream           |     |     |
| 3  | rs17564921 | 148372345 | 1.77E-07 | q24    | RP11-649A16.1 | non-coding intronic   |     |     |
| 16 | rs8045917  | 17181496  | 2.03E-07 | p12.3  | XYLT1         | intronic              |     |     |
| 1  | rs16841453 | 228161882 | 2.17E-07 | q42.13 |               |                       |     |     |
| 3  | rs10935663 | 148442795 | 2.22E-07 | q24    | RP11-649A16.1 | non-coding intronic   |     |     |
| 1  | rs1002784  | 76597183  | 3.23E-07 | p31.1  | ST6GALNAC3    | intronic              |     |     |
| 5  | rs10055858 | 89030846  | 3.23E-07 | q14.3  |               |                       |     |     |
| 5  | rs10063779 | 105861007 | 3.23E-07 | q21.3  |               |                       |     |     |
| 7  | rs10268591 | 119932159 | 3.23E-07 | q31.31 | KCND2         | intronic              |     |     |
| 6  | rs10456309 | 24697541  | 3.23E-07 | p22.3  | KIAA0319      | intronic              |     |     |
| 5  | rs10479370 | 105853569 | 3.23E-07 | q21.3  |               |                       |     |     |
| 2  | rs10490001 | 159847294 | 3.23E-07 | q24.2  | WDSUB1        | intronic              |     |     |
| 12 | rs10507004 | 90798986  | 3.23E-07 | q21.33 | RP11-587P21.2 | 3downstream           |     |     |
| 5  | rs10520823 | 15819072  | 3.23E-07 | p15.1  | FBXL7         | intronic              |     |     |
| 5  | rs10520825 | 15843676  | 3.23E-07 | p15.1  | FBXL7         | intronic              |     |     |
| 10 | rs10887535 | 87652532  | 3.23E-07 | q23.1  | GRID1         | intronic              |     |     |
| 9  | rs10979638 | 110784592 | 3.23E-07 | q31.3  | CTNNAL1       | intronic              |     |     |
| 9  | rs11141680 | 88905129  | 3.23E-07 | q21.33 |               |                       |     |     |
| 11 | rs11217642 | 96195766  | 3.23E-07 | q21    |               |                       |     |     |
| 16 | rs11643685 | 61605744  | 3.23E-07 | q21    |               |                       |     |     |
| 3  | rs11706381 | 134557477 | 3.23E-07 | q22.1  | TMEM108       | intronic              |     |     |
| 3  | rs11717365 | 134501970 | 3.23E-07 | q22.1  | TMEM108       | intronic              |     |     |
| 1  | rs11805072 | 213051045 | 3.23E-07 | q41    |               |                       |     |     |
| 16 | rs11866237 | 9681936   | 3.23E-07 | p13.2  |               |                       |     |     |
| 5  | rs11950687 | 5742346   | 3.23E-07 | p15.32 |               |                       |     |     |
| 7  | rs11972142 | 47896705  | 3.23E-07 | p12.3  | PKD1L1        | coding                | 879 | T>A |
| 9  | rs12002251 | 134360990 | 3.23E-07 | q34.13 | C9orf171      | intronic              |     |     |
| 13 | rs12018299 | 101947736 | 3.23E-07 |        |               |                       |     |     |

|    |            |           |          |        |               |                     |  |  |
|----|------------|-----------|----------|--------|---------------|---------------------|--|--|
| 1  | rs12043420 | 102471625 | 3.23E-07 | p21.1  | RP11-202K23.1 | non-coding intronic |  |  |
| 1  | rs12076827 | 157895588 | 3.23E-07 | q23.2  |               |                     |  |  |
| 1  | rs12083740 | 99497808  | 3.23E-07 | p21.2  |               |                     |  |  |
| 10 | rs1219510  | 123456933 | 3.23E-07 | q26.13 |               |                     |  |  |
| 10 | rs12261538 | 36057581  | 3.23E-07 | p11.21 |               |                     |  |  |
| 9  | rs12336476 | 89011803  | 3.23E-07 | q21.33 |               |                     |  |  |
| 9  | rs12337287 | 91945845  | 3.23E-07 | q22.2  |               |                     |  |  |
| 3  | rs12485617 | 60489702  | 3.23E-07 | p14.2  | FHIT          | intronic            |  |  |
| 1  | rs12564848 | 172542992 | 3.23E-07 | q25.1  | RABGAP1L      | intronic            |  |  |
| 1  | rs1275837  | 51734793  | 3.23E-07 | p32.3  | EPS15         | intronic            |  |  |
| 11 | rs12793676 | 127364290 | 3.23E-07 | q24.3  |               |                     |  |  |
| 20 | rs13039715 | 31333951  | 3.23E-07 | q11.21 | BPIFB1        | 5upstream           |  |  |
| 4  | rs13126627 | 110542371 | 3.23E-07 | q25    | SEC24B-AS1    | non-coding intronic |  |  |
| 7  | rs13308082 | 67099810  | 3.23E-07 | q11.22 |               |                     |  |  |
| 16 | rs13330694 | 9698859   | 3.23E-07 | p13.2  |               |                     |  |  |
| 16 | rs13335480 | 61624033  | 3.23E-07 | q21    |               |                     |  |  |
| 2  | rs13394534 | 168216885 | 3.23E-07 | q24.3  |               |                     |  |  |
| 2  | rs13402616 | 201828012 | 3.23E-07 | q33.1  | CASP8         | intronic            |  |  |
| 1  | rs1399437  | 18433075  | 3.23E-07 | p36.13 | IGSF21        | intronic            |  |  |
| 16 | rs1461207  | 61895782  | 3.23E-07 | q21    |               |                     |  |  |
| 8  | rs1480693  | 14889670  | 3.23E-07 | p22    | SGCZ          | intronic            |  |  |
| 2  | rs1527978  | 123421076 | 3.23E-07 | q14.3  |               |                     |  |  |
| 13 | rs1570885  | 23422626  | 3.23E-07 | q12.12 | ANKRD20A19P   | 5upstream           |  |  |
| 12 | rs1584091  | 39414082  | 3.23E-07 | q12    | CNTN1         | intronic            |  |  |
| 1  | rs16847402 | 172981674 | 3.23E-07 | q25.1  | RABGAP1L      | intronic            |  |  |
| 1  | rs16847563 | 173075477 | 3.23E-07 | q25.1  | RABGAP1L      | intronic            |  |  |
| 2  | rs16859160 | 219223187 | 3.23E-07 | q35    | ZNF142        | non-coding intronic |  |  |
| 10 | rs1693680  | 123452831 | 3.23E-07 | q26.13 |               |                     |  |  |
| 17 | rs16948748 | 1404589   | 3.23E-07 | p13.3  | PITPNA        | intronic            |  |  |
| 16 | rs16966127 | 9682827   | 3.23E-07 | p13.2  |               |                     |  |  |
| 15 | rs16974868 | 83450008  | 3.23E-07 | q25.3  | PDE8A         | intronic            |  |  |
| 12 | rs1697664  | 129058768 | 3.23E-07 | q24.33 |               |                     |  |  |

|    |            |           |          |        |               |                     |  |  |
|----|------------|-----------|----------|--------|---------------|---------------------|--|--|
| 2  | rs17009035 | 123448600 | 3.23E-07 | q14.3  |               |                     |  |  |
| 13 | rs17070878 | 47290134  | 3.23E-07 | q14.2  |               |                     |  |  |
| 8  | rs17077154 | 6338660   | 3.23E-07 | p23.1  | MCPH1         | intronic            |  |  |
| 14 | rs17097056 | 98040463  | 3.23E-07 | q32.2  | RP11-1082A3.1 | non-coding intronic |  |  |
| 16 | rs17144475 | 7640614   | 3.23E-07 | p13.3  | RBFOX1        | intronic            |  |  |
| 7  | rs17145007 | 67108027  | 3.23E-07 | q11.22 |               |                     |  |  |
| 6  | rs17209608 | 45164064  | 3.23E-07 | p21.1  | SUPT3H        | intronic            |  |  |
| 2  | rs17269759 | 114269008 | 3.23E-07 | q14.1  |               |                     |  |  |
| 18 | rs17392470 | 5999234   | 3.23E-07 | p11.31 | L3MBTL4       | intronic            |  |  |
| 1  | rs17489258 | 89446799  | 3.23E-07 | p22.2  |               |                     |  |  |
| 12 | rs17528736 | 54654785  | 3.23E-07 | q13.2  | CDK2          | 3downstream         |  |  |
| 10 | rs17598923 | 44025753  | 3.23E-07 | q11.21 |               |                     |  |  |
| 4  | rs17612737 | 111305670 | 3.23E-07 | q25    | ELOVL6        | intronic            |  |  |
| 17 | rs17626856 | 48624506  | 3.23E-07 | q22    |               |                     |  |  |
| 4  | rs17627742 | 113458601 | 3.23E-07 | q25    | ALPK1         | intronic            |  |  |
| 15 | rs17660734 | 51394095  | 3.23E-07 | q21.3  |               |                     |  |  |
| 2  | rs17763718 | 99403024  | 3.23E-07 | q11.2  | REV1          | intronic            |  |  |
| 1  | rs1890881  | 172443546 | 3.23E-07 | q25.1  | RABGAP1L      | intronic            |  |  |
| 11 | rs1938710  | 58290833  | 3.23E-07 | q12.1  |               |                     |  |  |
| 1  | rs2072758  | 172792540 | 3.23E-07 | q25.1  | RABGAP1L      | intronic            |  |  |
| 13 | rs2166619  | 41542679  | 3.23E-07 | q14.11 | DGKH          | intronic            |  |  |
| 4  | rs2343726  | 158099159 | 3.23E-07 | q32.1  | PDGFC         | intronic            |  |  |
| 5  | rs2402181  | 15839586  | 3.23E-07 | p15.1  | FBXL7         | intronic            |  |  |
| 10 | rs2483489  | 27566537  | 3.23E-07 | p12.1  | ACBD5         | intronic            |  |  |
| 3  | rs2590446  | 189078365 | 3.23E-07 | q27.3  |               |                     |  |  |
| 18 | rs2621178  | 411412    | 3.23E-07 | p11.32 | COLEC12       | intronic            |  |  |
| 13 | rs2793486  | 23632142  | 3.23E-07 | q12.12 | SPATA13       | 5upstream           |  |  |
| 21 | rs2831515  | 28407728  | 3.23E-07 | q21.3  | AL035610.1    | non-coding intronic |  |  |
| 14 | rs2899867  | 37680164  | 3.23E-07 | q21.1  | CTD-2058B24.2 | non-coding intronic |  |  |
| 8  | rs3020285  | 6321509   | 3.23E-07 | p23.1  | MCPH1         | intronic            |  |  |
| 5  | rs37195    | 142337942 | 3.23E-07 | q31.3  | ARHGAP26      | intronic            |  |  |
| 17 | rs3744453  | 42737869  | 3.23E-07 | q21.32 | ITGB3         | intronic            |  |  |



|    |           |           |          |        |                |                     |      |     |
|----|-----------|-----------|----------|--------|----------------|---------------------|------|-----|
| 11 | rs376813  | 8221633   | 3.23E-07 | p15.4  | LMO1           | intronic            |      |     |
| 5  | rs392632  | 93979772  | 3.23E-07 | q15    | ANKRD32/KIAA08 | 5upstream           |      |     |
| 21 | rs406923  | 45362919  | 3.23E-07 | q22.3  | ADARB1         | intronic            |      |     |
| 14 | rs4246989 | 20596530  | 3.23E-07 | q11.2  | RNASE8/NDRG2   | 3downstream         |      |     |
| 2  | rs4381764 | 201835108 | 3.23E-07 | q33.1  | CASP8          | intronic            |      |     |
| 4  | rs4455441 | 80837831  | 3.23E-07 | q21.21 | RP11-452C8.1   | 3downstream         |      |     |
| 1  | rs4506448 | 229229266 | 3.23E-07 | q42.2  | FAM89A         | intronic            |      |     |
| 11 | rs4528285 | 94025366  | 3.23E-07 | q21    | RP11-867G2.8   | non-coding intronic |      |     |
| 8  | rs4549773 | 14866331  | 3.23E-07 | p22    | SGCZ           | intronic            |      |     |
| 11 | rs4575258 | 42689169  | 3.23E-07 | p12    |                |                     |      |     |
| 4  | rs4693893 | 89016789  | 3.23E-07 | q22.1  |                |                     |      |     |
| 18 | rs4799717 | 29581632  | 3.23E-07 | q12.1  | ASXL3          | 3downstream         |      |     |
| 18 | rs4941252 | 60033312  | 3.23E-07 | q22.1  | RP11_146N18.1  | non-coding intronic |      |     |
| 8  | rs532410  | 37157791  | 3.23E-07 | p11.23 |                |                     |      |     |
| 1  | rs582798  | 94753841  | 3.23E-07 | p21.3  | ABCD3          | intronic            |      |     |
| 23 | rs5943189 | 110783611 | 3.23E-07 | q23    |                |                     |      |     |
| 23 | rs5953146 | 47771235  | 3.23E-07 | p11.23 | ZNF630         | intronic            |      |     |
| 20 | rs6068063 | 50118387  | 3.23E-07 | q13.2  | ZFP64          | intronic            |      |     |
| 20 | rs6111448 | 1718607   | 3.23E-07 | p13    |                |                     |      |     |
| 5  | rs640575  | 118164322 | 3.23E-07 | q23.1  |                |                     |      |     |
| 5  | rs6451105 | 34489338  | 3.23E-07 | p13.2  |                |                     |      |     |
| 11 | rs6590942 | 101362968 | 3.23E-07 | q22.1  | KIAA1377       | coding              | 1077 | S>N |
| 2  | rs6711579 | 32707160  | 3.23E-07 | p22.3  | TTC27          | intronic            |      |     |
| 2  | rs6724815 | 71138848  | 3.23E-07 | p13.3  | AC007040.8     | non-coding intronic |      |     |
| 2  | rs6757356 | 231542832 | 3.23E-07 | q37.1  |                |                     |      |     |
| 18 | rs677592  | 64596256  | 3.23E-07 | q22.1  | CCDC102B       | intronic            |      |     |
| 3  | rs6783318 | 163605873 | 3.23E-07 | q26.1  |                |                     |      |     |
| 4  | rs6857926 | 91615328  | 3.23E-07 | q22.1  | CCSER1         | intronic            |      |     |
| 6  | rs6936924 | 34673137  | 3.23E-07 | p21.31 | C6orf106       | intronic            |      |     |
| 6  | rs6938596 | 53124162  | 3.23E-07 | p12.1  |                |                     |      |     |
| 6  | rs6941744 | 53088262  | 3.23E-07 | p12.1  |                |                     |      |     |
| 8  | rs7010925 | 14882160  | 3.23E-07 | p22    | SGCZ           | intronic            |      |     |

|    |           |           |          |        |               |                     |  |  |
|----|-----------|-----------|----------|--------|---------------|---------------------|--|--|
| 9  | rs7032191 | 89040606  | 3.23E-07 | q21.33 | BC093087      | intronic            |  |  |
| 9  | rs7041667 | 88880438  | 3.23E-07 | q21.33 |               |                     |  |  |
| 10 | rs7076228 | 129660744 | 3.23E-07 | q26.2  | PTPRE         | intronic            |  |  |
| 1  | rs712904  | 99496352  | 3.23E-07 | p21.2  |               |                     |  |  |
| 15 | rs7167692 | 83461188  | 3.23E-07 | q25.3  | PDE8A         | intronic            |  |  |
| 15 | rs7182328 | 83451685  | 3.23E-07 | q25.3  | PDE8A         | intronic            |  |  |
| 16 | rs7205559 | 80193831  | 3.23E-07 | q23.2  | CMIP          | intronic            |  |  |
| 17 | rs7225354 | 76772657  | 3.23E-07 | q25.3  | AATK_AS1      | 3downstream         |  |  |
| 17 | rs7226359 | 76772601  | 3.23E-07 | q25.3  | AATK_AS1      | 3downstream         |  |  |
| 4  | rs729545  | 94120351  | 3.23E-07 | q22.2  | GRID2         | intronic            |  |  |
| 17 | rs7342860 | 14473850  | 3.23E-07 | p12    |               |                     |  |  |
| 6  | rs7449883 | 94717168  | 3.23E-07 | q16.1  |               |                     |  |  |
| 1  | rs7531638 | 87967965  | 3.23E-07 | p22.3  |               |                     |  |  |
| 11 | rs765824  | 74580143  | 3.23E-07 | q13.4  | SLCO2B1       | intronic            |  |  |
| 4  | rs768063  | 110839905 | 3.23E-07 | q25    | CASP6         | intronic            |  |  |
| 5  | rs7715761 | 34445932  | 3.23E-07 | p13.2  |               |                     |  |  |
| 6  | rs7752412 | 18022783  | 3.23E-07 | p22.3  | KIF13A        | intronic            |  |  |
| 9  | rs7855148 | 1506528   | 3.23E-07 | p24.3  |               |                     |  |  |
| 9  | rs7871216 | 36235759  | 3.23E-07 | p13.3  | GNE           | intronic            |  |  |
| 11 | rs7932838 | 15634562  | 3.23E-07 | p15.2  | RP11-396O20.1 | non-coding intronic |  |  |
| 13 | rs7994396 | 42109344  | 3.23E-07 | q14.11 |               |                     |  |  |
| 14 | rs8014003 | 102230954 | 3.23E-07 | q32.31 | RCOR1         | intronic            |  |  |
| 5  | rs8192207 | 6709161   | 3.23E-07 | p15.31 | SRD5A1        | intronic            |  |  |
| 1  | rs819771  | 99500510  | 3.23E-07 | p21.2  | LPPR4         | Supstream           |  |  |
| 1  | rs841166  | 245976637 | 3.23E-07 | q44    | RP11-634B7.4  | non-coding          |  |  |
| 9  | rs869939  | 1043465   | 3.23E-07 | p24.3  | DMRT2         | intronic            |  |  |
| 13 | rs9300818 | 102917124 | 3.23E-07 | q33.1  |               |                     |  |  |
| 6  | rs9488761 | 116158620 | 3.23E-07 | q22.1  |               |                     |  |  |
| 17 | rs951351  | 42719806  | 3.23E-07 | q21.32 | ITGB3         | intronic            |  |  |
| 13 | rs9538062 | 57955513  | 3.23E-07 | q21.1  |               |                     |  |  |
| 13 | rs9598428 | 61669852  | 3.23E-07 | q21.31 |               |                     |  |  |
| 13 | rs9602747 | 84895132  | 3.23E-07 | q31.1  | LINC00351     | non-coding intronic |  |  |

|    |            |           |          |        |            |                     |  |  |
|----|------------|-----------|----------|--------|------------|---------------------|--|--|
| 22 | rs9613025  | 24563110  | 3.23E-07 | q12.1  | MYO18B     | intronic            |  |  |
| 2  | rs9784032  | 219123706 | 3.23E-07 | q35    | USP37      | intronic            |  |  |
| 3  | rs9819189  | 9226198   | 3.23E-07 | p25.3  | SRGAP3     | intronic            |  |  |
| 3  | rs9829141  | 7333130   | 3.23E-07 | p26.1  | GRM7       | intronic            |  |  |
| 16 | rs9932038  | 80172371  | 3.23E-07 | q23.2  | CMIP       | intronic            |  |  |
| 18 | rs9948203  | 47828662  | 3.23E-07 | q21.2  |            |                     |  |  |
| 18 | rs10515975 | 53727976  | 3.26E-07 | q21.31 |            |                     |  |  |
| 11 | rs10734506 | 42616027  | 4.35E-07 | p12    |            |                     |  |  |
| 5  | rs11744289 | 53319086  | 4.35E-07 | q11.2  | ARL15      | intronic            |  |  |
| 8  | rs11987866 | 14879967  | 4.35E-07 | p22    | SGCZ       | intronic            |  |  |
| 7  | rs6946476  | 152651675 | 4.35E-07 | q36.2  |            |                     |  |  |
| 17 | rs11658255 | 34516027  | 4.51E-07 | q12    | PLXDC1     | intronic            |  |  |
| 6  | rs4573107  | 128463455 | 4.51E-07 | q22.33 | PTPRK      | intronic            |  |  |
| 13 | rs4770541  | 23468384  | 4.51E-07 | q12.12 | SPATA13    | non-coding intronic |  |  |
| 14 | rs11157351 | 42897456  | 4.66E-07 | q21.2  |            |                     |  |  |
| 5  | rs156030   | 131558816 | 4.67E-07 | q31.1  | P4HA2      | intronic            |  |  |
| 4  | rs16871093 | 21078237  | 4.67E-07 | p15.2  | KCNIP4     | intronic            |  |  |
| 3  | rs4955642  | 170466241 | 4.73E-07 | q26.2  | MECOM      | intronic            |  |  |
| 20 | rs6092968  | 36802458  | 4.79E-07 | q11.23 |            |                     |  |  |
| 2  | rs11676424 | 239338075 | 4.90E-07 | q37.3  |            |                     |  |  |
| 13 | rs9600156  | 73170028  | 4.90E-07 | q22.1  | KLF12      | intronic            |  |  |
| 22 | rs17806754 | 32417553  | 4.92E-07 | q12.3  | LARGE      | intronic            |  |  |
| 12 | rs12812815 | 85758126  | 5.61E-07 | q21.32 | MGAT4C     | Supstream           |  |  |
| 21 | rs7275508  | 25577166  | 6.45E-07 | q21.2  | AP000233.4 | non-coding intronic |  |  |
| 9  | rs6479471  | 95084239  | 7.13E-07 | q22.31 | WNK2       | intronic            |  |  |
| 9  | rs7022051  | 95042804  | 7.13E-07 | q22.31 | WNK2       | intronic            |  |  |
| 4  | rs17005129 | 82543901  | 7.41E-07 | q21.21 |            |                     |  |  |
| 17 | rs9897203  | 59960605  | 7.41E-07 | q23.3  | CEP95      | intronic            |  |  |
| 11 | rs7123143  | 80683168  | 7.63E-07 | q14.1  |            |                     |  |  |
| 6  | rs522185   | 165552357 | 8.91E-07 | q27    |            |                     |  |  |
| 20 | rs17805193 | 59138980  | 9.35E-07 | q13.33 |            |                     |  |  |
| 5  | rs350042   | 40242561  | 9.49E-07 | p13.1  |            |                     |  |  |

|    |            |           |          |        |         |             |  |  |
|----|------------|-----------|----------|--------|---------|-------------|--|--|
| 22 | rs6005657  | 26565087  | 9.68E-07 | q12.1  |         |             |  |  |
| 7  | rs10250704 | 150195351 | 1.05E-06 | q36.1  |         |             |  |  |
| 7  | rs4725970  | 150189544 | 1.05E-06 | q36.1  | AOC1    | 3downstream |  |  |
| 10 | rs16936610 | 80354231  | 1.14E-06 | q22.3  |         |             |  |  |
| 11 | rs1879229  | 23938956  | 1.14E-06 | p14.3  |         |             |  |  |
| 20 | rs3918278  | 44069061  | 1.14E-06 | q13.12 | MMP9    | 5upstream   |  |  |
| 2  | rs11903702 | 231229065 | 1.33E-06 | q37.1  |         |             |  |  |
| 2  | rs12618382 | 231225449 | 1.33E-06 | q37.1  |         |             |  |  |
| 17 | rs7216649  | 47522839  | 1.33E-06 | q21.33 | CA10    | intronic    |  |  |
| 2  | rs10498133 | 222812549 | 1.34E-06 | q36.1  | PAX3    | intronic    |  |  |
| 8  | rs16868879 | 103095400 | 1.34E-06 | q22.3  | NCALD   | intronic    |  |  |
| 5  | rs16902290 | 34522293  | 1.34E-06 | p13.2  |         |             |  |  |
| 4  | rs17005123 | 82534494  | 1.34E-06 | q21.21 |         |             |  |  |
| 6  | rs17287803 | 42039979  | 1.34E-06 | p21.1  | CCND3   | intronic    |  |  |
| 14 | rs1957173  | 45476666  | 1.34E-06 | q21.2  |         |             |  |  |
| 18 | rs236035   | 6320209   | 1.34E-06 | p11.31 | L3MBTL4 | intronic    |  |  |
| 2  | rs384180   | 6483994   | 1.34E-06 | p25.2  |         |             |  |  |
| 18 | rs401127   | 6305088   | 1.34E-06 | p11.31 | L3MBTL4 | intronic    |  |  |
| 12 | rs7135813  | 85718641  | 1.34E-06 | q21.32 | MGAT4C  | intronic    |  |  |
| 7  | rs10234070 | 44504221  | 1.44E-06 | p13    |         |             |  |  |
| 4  | rs11098654 | 123128865 | 1.54E-06 | q27    |         |             |  |  |
| 6  | rs16870964 | 93937635  | 1.55E-06 | q16.1  |         |             |  |  |
| 14 | rs765247   | 72261487  | 1.73E-06 | q24.2  | DPF3    | intronic    |  |  |
| 10 | rs497204   | 80306297  | 1.89E-06 | q22.3  |         |             |  |  |
| 9  | rs7049140  | 137201080 | 1.90E-06 | q34.3  |         |             |  |  |
| 9  | rs3763646  | 110671791 | 2.46E-06 | q31.3  | IKBKAP  | intronic    |  |  |
| 9  | rs3802431  | 110932446 | 2.46E-06 | q31.3  | FRRS1L  | 3utr        |  |  |
| 9  | rs7581     | 110819068 | 2.46E-06 | q31.3  | TMEM245 | 3utr        |  |  |
| 23 | rs6629669  | 23454170  | 2.48E-06 | p22.11 |         |             |  |  |
| 5  | rs7444875  | 34520901  | 2.53E-06 | p13.2  |         |             |  |  |
| 13 | rs1475201  | 44347321  | 2.60E-06 | q14.12 |         |             |  |  |
| 3  | rs7636993  | 36421322  | 2.60E-06 | p22.3  | STAC    | intronic    |  |  |

|    |            |           |          |        |                |                     |  |
|----|------------|-----------|----------|--------|----------------|---------------------|--|
| 13 | rs7994080  | 89513893  | 2.60E-06 | q31.3  | LINC00559      | non-coding intronic |  |
| 13 | rs9583780  | 89516023  | 2.60E-06 | q31.3  | LINC00559      | non-coding intronic |  |
| 7  | rs4721433  | 15406633  | 3.20E-06 | p21.2  | AGMO           | intronic            |  |
| 8  | rs2527724  | 5456598   | 3.49E-06 | p23.2  |                |                     |  |
| 10 | rs10444114 | 119650841 | 3.54E-06 | q26.11 |                |                     |  |
| 12 | rs11172790 | 57555007  | 3.54E-06 | q14.1  | LRIG3          | intronic            |  |
| 11 | rs11220381 | 125529652 | 3.54E-06 | q24.2  |                |                     |  |
| 19 | rs11668338 | 7666624   | 3.54E-06 | p13.2  | FCER2          | intronic            |  |
| 4  | rs11935585 | 30925362  | 3.54E-06 | p15.1  |                |                     |  |
| 22 | rs12160908 | 24258620  | 3.54E-06 | q12.1  | AL008721.1     | 3downstream         |  |
| 7  | rs13340481 | 109510205 | 3.54E-06 | q31.1  |                |                     |  |
| 11 | rs1488864  | 6298905   | 3.54E-06 | p15.4  | PRKCDBP        | 5upstream           |  |
| 10 | rs16932709 | 77349643  | 3.54E-06 | q22.2  | C10orf11       | intronic            |  |
| 23 | rs16985316 | 8917394   | 3.54E-06 | p22.31 |                |                     |  |
| 15 | rs2242025  | 59810691  | 3.54E-06 | q22.2  | RP11-162I7.1   | non-coding          |  |
| 11 | rs2682119  | 6307685   | 3.54E-06 | p15.4  |                |                     |  |
| 23 | rs3130866  | 72225071  | 3.54E-06 | q13.2  |                |                     |  |
| 13 | rs4773861  | 94704873  | 3.54E-06 | q32.1  | ABCC4          | intronic            |  |
| 23 | rs5969912  | 151552128 | 3.54E-06 | q28    |                |                     |  |
| 20 | rs6099111  | 54370639  | 3.54E-06 | q13.2  | FAM210B        | intronic            |  |
| 13 | rs7329514  | 94714801  | 3.54E-06 | q32.1  | ABCC4          | intronic            |  |
| 1  | rs7544426  | 109977503 | 3.54E-06 | p13.3  | AMPD2          | 3downstream         |  |
| 17 | rs2676801  | 45048685  | 3.78E-06 | q21.33 | SPOP           | intronic            |  |
| 17 | rs4794061  | 45131084  | 3.78E-06 | q21.33 |                |                     |  |
| 11 | rs10501635 | 86714986  | 4.08E-06 | q14.2  | TMEM135        | 3utr                |  |
| 2  | rs1437871  | 197540123 | 4.39E-06 | q33.1  | ANKRD44        | 3utr                |  |
| 3  | rs17195143 | 25042378  | 4.39E-06 | p24.2  | RNA5SP125/AC13 | 3downstream         |  |
| 1  | rs4373782  | 27722525  | 4.39E-06 | p36.11 |                |                     |  |
| 2  | rs6545561  | 56310240  | 4.39E-06 | p16.1  | CCDC85A        | intronic            |  |
| 2  | rs6733298  | 56304360  | 4.39E-06 | p16.1  | CCDC85A        | intronic            |  |
| 2  | rs6756156  | 56285098  | 4.39E-06 | p16.1  | CCDC85A        | intronic            |  |
| 8  | rs11777289 | 131258480 | 4.44E-06 | q24.21 | ASAP1          | intronic            |  |

|    |            |           |          |        |        |                     |  |  |
|----|------------|-----------|----------|--------|--------|---------------------|--|--|
| 8  | rs11778881 | 131360369 | 4.44E-06 | q24.21 | ASAP1  | intronic            |  |  |
| 8  | rs4639572  | 131187840 | 4.44E-06 | q24.21 | ASAP1  | intronic            |  |  |
| 3  | rs17038236 | 13515641  | 4.63E-06 | p25.1  | HDAC11 | intronic            |  |  |
| 9  | rs10992681 | 95018086  | 4.65E-06 | q22.31 | WNK2   | intronic            |  |  |
| 17 | rs2314640  | 9242675   | 4.71E-06 | p13.1  | STX8   | non-coding intronic |  |  |
| 2  | rs17039644 | 2377906   | 5.01E-06 | p25.3  |        |                     |  |  |
| 3  | rs17035408 | 36662904  | 5.11E-06 | p22.2  |        |                     |  |  |
| 9  | rs7857220  | 95064873  | 5.57E-06 | q22.31 | WNK2   | intronic            |  |  |
| 4  | rs1120767  | 126036233 | 5.60E-06 | q28.1  |        |                     |  |  |
| 9  | rs1360433  | 3739196   | 5.60E-06 | p24.2  |        |                     |  |  |
| 16 | rs17248940 | 60324113  | 5.60E-06 | q21    | CDH8   | intronic            |  |  |
| 1  | rs6701090  | 69273403  | 5.60E-06 | p31.2  |        |                     |  |  |
| 4  | rs7686429  | 126034105 | 5.60E-06 | q28.1  |        |                     |  |  |
| 5  | rs7720612  | 72490276  | 5.60E-06 | q13.2  | KIF13A | intronic            |  |  |
| 6  | rs13192235 | 135388044 | 5.68E-06 | q23.3  | HBS1L  | intronic            |  |  |
| 21 | rs2242724  | 35663806  | 5.68E-06 | q22.12 | RUNX1  | intronic            |  |  |
| 11 | rs963090   | 83356568  | 6.10E-06 | q14.1  | DLG2   | intronic            |  |  |
| 3  | rs2116701  | 25416981  | 6.20E-06 | p24.2  | RARB   | intronic            |  |  |
| 17 | rs3815269  | 11746991  | 6.30E-06 | p12    | DNAH9  | intronic            |  |  |
| 5  | rs10070739 | 66580635  | 6.69E-06 | q12.3  |        |                     |  |  |
| 3  | rs12633552 | 73845979  | 6.69E-06 | p13    |        |                     |  |  |
| 8  | rs17468779 | 18835962  | 6.69E-06 | p22    | PSD3   | intronic            |  |  |
| 4  | rs10002695 | 116780139 | 6.77E-06 | q26    |        |                     |  |  |
| 4  | rs4146409  | 116766549 | 6.77E-06 | q26    |        |                     |  |  |
| 4  | rs7673850  | 116805318 | 6.77E-06 | q26    |        |                     |  |  |
| 4  | rs7677317  | 116817988 | 6.77E-06 | q26    |        |                     |  |  |
| 14 | rs12897976 | 102962763 | 7.35E-06 | q32.32 | MARK3  | intronic            |  |  |
| 5  | rs10940096 | 66586611  | 7.48E-06 | q12.3  |        |                     |  |  |
| 7  | rs10224816 | 9678184   | 7.68E-06 | p21.3  |        |                     |  |  |
| 1  | rs17044576 | 205701293 | 8.40E-06 | q32.2  | CR2    | intronic            |  |  |
| 11 | rs290071   | 30962944  | 8.40E-06 | p13    | DCDC5  | intronic            |  |  |
| 16 | rs7205322  | 18865263  | 8.40E-06 | p12.3  |        |                     |  |  |

| 1                              | rs4660484  | 41141921  | 9.31E-06 | p34.2  |                |             |             |           |
|--------------------------------|------------|-----------|----------|--------|----------------|-------------|-------------|-----------|
| 7                              | rs12669535 | 150791535 | 9.46E-06 | q36.1  | RN7SL76P       | 3downstream |             |           |
| 16                             | rs9941146  | 12807987  | 9.67E-06 | p13.12 |                |             |             |           |
| 17                             | rs12951596 | 76494978  | 9.76E-06 | q25.3  | RPTOR          | intronic    |             |           |
|                                |            |           |          |        |                |             |             |           |
| <b>Perseverative Behaviors</b> |            |           |          |        |                |             |             |           |
| CHR                            | SNP        | BP        | P        | Band   | Genes          | Role        | aa Position | aa Change |
| 2                              | rs6745182  | 190533471 | 1.51E-08 | q32.2  | C2orf88        | intronic    |             |           |
| 7                              | rs4337997  | 22351942  | 1.40E-07 | p15.3  | RAPGEF5        | intronic    |             |           |
| 5                              | rs1870658  | 73612235  | 2.00E-07 | q13.3  |                |             |             |           |
| 5                              | rs471405   | 73613440  | 2.00E-07 | q13.3  |                |             |             |           |
| 6                              | rs1233386  | 29666169  | 5.28E-07 | p22.1  | OR2H2          | 3downstream |             |           |
| 5                              | rs10059061 | 95806928  | 1.23E-06 | q15    | CTD-2337A12.1  | intronic    |             |           |
| 13                             | rs9545030  | 78724117  | 1.42E-06 | q31.1  |                |             |             |           |
| 16                             | rs17261378 | 81231342  | 1.58E-06 | q23.3  | CDH13          | intronic    |             |           |
| 9                              | rs3780457  | 99962228  | 1.58E-06 | q22.33 | CORO2A         | intronic    |             |           |
| 4                              | rs2871491  | 186937857 | 1.81E-06 | q35.1  | SORBS2         | intronic    |             |           |
| 17                             | rs9894565  | 17047909  | 2.48E-06 | p11.2  | PLD6/RP11-45M2 | intronic    |             |           |
| 5                              | rs149473   | 123648735 | 3.96E-06 | q23.2  |                |             |             |           |
| 13                             | rs7339418  | 78718127  | 3.96E-06 | q31.1  |                |             |             |           |
| 13                             | rs7983960  | 78734451  | 3.96E-06 | q31.1  |                |             |             |           |
| 13                             | rs9545039  | 78740745  | 3.96E-06 | q31.1  |                |             |             |           |
| 6                              | rs12529308 | 40797708  | 4.37E-06 | p21.1  |                |             |             |           |
| 6                              | rs7756298  | 40808750  | 4.37E-06 | p21.1  |                |             |             |           |
| 3                              | rs9310756  | 24767428  | 5.17E-06 | p24.2  | AC133680.1     | intronic    |             |           |
| 12                             | rs2708079  | 41202340  | 6.77E-06 | q12    | PRICKLE1       | intronic    |             |           |
| 7                              | rs12333620 | 22324730  | 6.90E-06 | p15.3  | RAPGEF5        | intronic    |             |           |
| 7                              | rs1568571  | 22341449  | 6.90E-06 | p15.3  | RAPGEF5        | intronic    |             |           |
| 13                             | rs12874523 | 105487642 | 7.33E-06 | q33.2  |                |             |             |           |
| 9                              | rs7042145  | 8394095   | 8.14E-06 | p24.1  | PTPRD          | intronic    |             |           |
| 8                              | rs11784372 | 121589419 | 8.48E-06 | q24.12 | MTBP           | intronic    |             |           |
| 3                              | rs6438175  | 115134904 | 8.48E-06 | q13.31 | GRAMD1C        | intronic    |             |           |

|   |           |          |          |       |             |          |  |  |
|---|-----------|----------|----------|-------|-------------|----------|--|--|
| 6 | rs6912147 | 22371817 | 8.48E-06 | p22.3 | RP3-404K8.2 | intronic |  |  |
|---|-----------|----------|----------|-------|-------------|----------|--|--|
