# Supplementary material for: ASD Phenotype—Genotype Associations in Concordant and Discordant Monozygotic and Dizygotic Twins Stratified by Severity of Autistic Traits
Source: MDPI journal article supplement (doi:10.3390/ijms20153804), 2019-08-03
Supplement: s1 [file s1]

| Summary of case-control by quartile analysis of dNA.MZ twins (using genotypes of dA.MZ as proxy) |     |           |           |    |       |       |    |       |       |          |          |          |          |         |            |               |  |
|--------------------------------------------------------------------------------------------------|-----|-----------|-----------|----|-------|-------|----|-------|-------|----------|----------|----------|----------|---------|------------|---------------|--|
| Language                                                                                         |     |           |           |    |       |       |    |       |       |          |          |          |          |         |            |               |  |
| Q4 (N = 6)                                                                                       | CHR | SNP       | BP        | A1 | F_A   | F_U   | A2 | CHISQ | OR    | UNADJ    | BONF     | FDR_BH   | Band     | Alleles | Gene(s)    | Role          |  |
|                                                                                                  | 7   | rs1553841 | 47510767  | T  | 0.417 | 0.052 | C  | 31.56 | 12.94 | 1.94E-08 | 5.04E-07 | 5.04E-07 | 7p12.3   | C T     | TNS3       | Intron        |  |
|                                                                                                  | 2   | rs6742060 | 238234971 | G  | 0.500 | 0.105 | A  | 19.71 | 8.52  | 9.00E-06 | 2.34E-04 | 1.17E-04 | 2q37.3   | A G     | LRRFIP1    | Intron        |  |
|                                                                                                  | 5   | rs3896348 | 18204313  | G  | 0.667 | 0.211 | A  | 14.93 | 7.50  | 1.11E-04 | 2.90E-03 | 8.54E-04 | 5p15.1   |         |            |               |  |
|                                                                                                  | 2   | rs3791289 | 134827909 | C  | 0.750 | 0.263 | T  | 14.62 | 8.42  | 1.31E-04 | 3.42E-03 | 8.54E-04 | 2q21.3   | C T     | MGAT5      | Intron        |  |
|                                                                                                  | 14  | rs1015166 | 33007535  | C  | 0.583 | 0.176 | T  | 13.61 | 6.55  | 2.25E-04 | 5.85E-03 | 1.17E-03 | 14q13.1  | T C     | NPAS3      | Intron        |  |
|                                                                                                  | 6   | rs4443522 | 129211626 | G  | 0.917 | 0.452 | A  | 10.42 | 13.33 | 1.25E-03 | 3.24E-02 | 5.40E-03 | 6q22.33  |         |            |               |  |
|                                                                                                  | 6   | rs4487603 | 129211602 | T  | 0.917 | 0.463 | C  | 9.931 | 12.79 | 1.63E-03 | 4.23E-02 | 6.04E-03 | 6q22.33  |         |            |               |  |
|                                                                                                  | 12  | rs1996749 | 102245143 | A  | 0.833 | 0.398 | G  | 9.446 | 7.55  | 2.12E-03 | 5.50E-02 | 6.88E-03 | 12q23.2  | G A     | C12orf42   | Intron        |  |
|                                                                                                  | 1   | rs3766793 | 53363218  | C  | 0.500 | 0.173 | T  | 8.937 | 4.79  | 2.79E-03 | 7.26E-02 | 8.07E-03 | 1p32.3   | T C     | SLC1A7     | Intron        |  |
|                                                                                                  | 2   | rs1049023 | 50391831  | T  | 0.417 | 0.136 | C  | 8.002 | 4.54  | 4.67E-03 | 1.22E-01 | 1.22E-02 | 2p16.3   | G A     | NRXN1      | Intron        |  |
|                                                                                                  | 1   | rs783036  | 66603958  | T  | 0.083 | 0.481 | C  | 7.581 | 0.10  | 5.90E-03 | 1.53E-01 | 1.32E-02 | 1p31.3   | G A     | PDE4B      | coding        |  |
|                                                                                                  | 8   | rs2618806 | 2111558   | C  | 0.500 | 0.189 | T  | 7.527 | 4.29  | 6.08E-03 | 1.58E-01 | 1.32E-02 | 8p23.3   |         |            |               |  |
|                                                                                                  | 5   | rs923963  | 62075399  | G  | 0.000 | 0.351 | T  | 6.481 | 0.00  | 1.09E-02 | 2.84E-01 | 2.18E-02 | 5q12.1   |         |            |               |  |
|                                                                                                  | 8   | rs921693  | 131074193 | T  | 0.583 | 0.263 | C  | 6.334 | 3.93  | 1.18E-02 | 3.08E-01 | 2.20E-02 | 8q24.21  | G A     | FAM49B     | Intron        |  |
|                                                                                                  | 8   | rs1095650 | 131051089 | A  | 0.600 | 0.256 | C  | 6.179 | 4.36  | 1.29E-02 | 3.36E-01 | 2.24E-02 | 8q24.21  | C A     | FAM49B     | Intron        |  |
|                                                                                                  | 12  | rs1105788 | 123937926 | A  | 0.417 | 0.159 | C  | 5.925 | 3.78  | 1.49E-02 | 3.88E-01 | 2.43E-02 | 12q24.31 |         |            |               |  |
|                                                                                                  | 7   | rs1023837 | 30940878  | A  | 0.500 | 0.223 | G  | 5.305 | 3.49  | 2.13E-02 | 5.53E-01 | 3.12E-02 | 7p14.3   |         |            |               |  |
|                                                                                                  | 3   | rs4521229 | 181973610 | A  | 0.500 | 0.223 | G  | 5.277 | 3.48  | 2.16E-02 | 5.62E-01 | 3.12E-02 | 3q26.33  | G A     | CCDC39     | Intron        |  |
|                                                                                                  | 11  | rs1104153 | 7671750   | C  | 0.000 | 0.281 | T  | 4.68  | 0.00  | 3.05E-02 | 7.94E-01 | 4.18E-02 | 11p15.4  | T C     | OVCH2      | Intron        |  |
|                                                                                                  | 5   | rs1252157 | 18187934  | G  | 0.500 | 0.239 | A  | 4.47  | 3.18  | 3.45E-02 | 8.97E-01 | 4.49E-02 | 5p15.1   |         |            |               |  |
|                                                                                                  | 6   | rs1252529 | 107246561 | G  | 0.500 | 0.246 | T  | 4.166 | 3.07  | 4.13E-02 | 1.00E+00 | 5.11E-02 | 6q21     |         |            |               |  |
|                                                                                                  | 15  | rs1291526 | 30196358  | C  | 0.417 | 0.201 | T  | 3.448 | 2.84  | 6.33E-02 | 1.00E+00 | 7.49E-02 | 15q13.3  | T C     | CHRNA7     | Intron        |  |
|                                                                                                  | 8   | rs604302  | 37123727  | A  | 0.417 | 0.209 | G  | 3.126 | 2.71  | 7.70E-02 | 1.00E+00 | 8.71E-02 | 8p11.23  |         |            |               |  |
| Nonverbal                                                                                        |     |           |           |    |       |       |    |       |       |          |          |          |          |         |            |               |  |
| Q4 (N = 4)                                                                                       | CHR | SNP       | BP        | A1 | F_A   | F_U   | A2 | CHISQ | OR    | UNADJ    | BONF     | FDR_BH   | Band     | Alleles | Gene(s)    | Role          |  |
|                                                                                                  | 11  | rs7951632 | 110358395 | A  | 0.625 | 0.074 | G  | 34.75 | 20.72 | 3.75E-09 | 1.09E-07 | 1.09E-07 | 11q23.1  |         |            |               |  |
|                                                                                                  | 2   | rs6745492 | 237172556 | T  | 0.500 | 0.055 | C  | 30.34 | 17.33 | 3.62E-08 | 1.05E-06 | 5.25E-07 | 2q37.3   |         |            |               |  |
|                                                                                                  | 22  | rs739140  | 36445502  | G  | 0.625 | 0.106 | A  | 22.68 | 14.13 | 1.91E-06 | 5.55E-05 | 1.85E-05 | 22q13.1  | G A     | TRIOBP     | Intron        |  |
|                                                                                                  | 1   | rs1683335 | 234358516 | G  | 0.500 | 0.073 | A  | 21.18 | 12.62 | 4.19E-06 | 1.21E-04 | 2.69E-05 | 1q42.3   |         |            |               |  |
|                                                                                                  | 3   | rs7628531 | 72684645  | G  | 0.625 | 0.112 | A  | 20.93 | 13.18 | 4.75E-06 | 1.38E-04 | 2.69E-05 | 3p13     |         |            |               |  |
|                                                                                                  | 19  | rs4808521 | 16646721  | G  | 0.625 | 0.114 | A  | 20.63 | 13.02 | 5.56E-06 | 1.61E-04 | 2.69E-05 | 19p13.11 | A G     | TMEM38A    | Intron        |  |
|                                                                                                  | 3   | rs2010479 | 127860189 | C  | 0.500 | 0.080 | T  | 18.93 | 11.47 | 1.36E-05 | 3.94E-04 | 4.01E-05 | 3q21.3   | T C     | NUP210P1   | 5upstream     |  |
|                                                                                                  | 6   | rs1414743 | 142319462 | T  | 0.625 | 0.121 | C  | 18.88 | 12.06 | 1.39E-05 | 4.04E-04 | 4.01E-05 | 6q24.1   | G A     | AK097143   | Intron        |  |
|                                                                                                  | 2   | rs2072474 | 102005641 | C  | 0.750 | 0.171 | T  | 18.8  | 14.54 | 1.45E-05 | 4.21E-04 | 4.01E-05 | 2q11.2   | A G     | IL1R2      | Intron        |  |
|                                                                                                  | 6   | rs2256028 | 31487177  | T  | 0.750 | 0.172 | G  | 18.73 | 14.49 | 1.51E-05 | 4.38E-04 | 4.01E-05 | 6p21.33  | C A     | MICA       | Intron        |  |
|                                                                                                  | 3   | rs7628233 | 127878243 | A  | 0.500 | 0.081 | G  | 18.71 | 11.36 | 1.52E-05 | 4.41E-04 | 4.01E-05 | 3q21.3   |         |            |               |  |
|                                                                                                  | 1   | rs1112006 | 211141648 | T  | 0.625 | 0.125 | C  | 18.2  | 11.69 | 1.98E-05 | 5.76E-04 | 4.52E-05 | 1q32.3   |         |            |               |  |
|                                                                                                  | 1   | rs1284851 | 211139989 | T  | 0.625 | 0.125 | C  | 18.16 | 11.67 | 2.03E-05 | 5.88E-04 | 4.52E-05 | 1q32.3   | G A     | FLVCR1     | 3downstream   |  |
|                                                                                                  | 5   | rs42914   | 36771041  | A  | 0.625 | 0.131 | C  | 17.1  | 11.10 | 3.54E-05 | 1.03E-03 | 7.33E-05 | 5p13.2   |         |            |               |  |
|                                                                                                  | 12  | rs1077798 | 98353626  | T  | 0.750 | 0.194 | C  | 15.79 | 12.50 | 7.09E-05 | 2.06E-03 | 1.37E-04 | 12q23.1  | C T     | ANKS1B     | Intron        |  |
|                                                                                                  | 3   | rs3872649 | 245521    | C  | 0.625 | 0.140 | T  | 15.59 | 10.27 | 7.85E-05 | 2.28E-03 | 1.42E-04 | 3p26.3   | G A     | CHL1       | Intron        |  |
|                                                                                                  | 20  | rs2300216 | 3894057   | C  | 0.625 | 0.142 | T  | 15.2  | 10.06 | 9.65E-05 | 2.80E-03 | 1.65E-04 | 20p13    | A G     | RNF24      | Intron        |  |
|                                                                                                  | 17  | rs1107942 | 56810004  | A  | 0.500 | 0.096 | G  | 14.92 | 9.42  | 1.12E-04 | 3.24E-03 | 1.80E-04 | 17q23.2  | A G     | BCAS3      | Intron        |  |
|                                                                                                  | 20  | rs6062894 | 61425120  | C  | 0.500 | 0.107 | T  | 12.86 | 8.36  | 3.36E-04 | 9.73E-03 | 5.12E-04 | 20q13.33 | C T     | COL20A1    | Intron        |  |
|                                                                                                  | 4   | rs737601  | 9762331   | G  | 0.500 | 0.111 | A  | 12.24 | 8.04  | 4.68E-04 | 1.36E-02 | 6.79E-04 | 4p16.1   |         |            |               |  |
|                                                                                                  | 6   | rs663614  | 87491867  | C  | 0.500 | 0.119 | A  | 11.05 | 7.43  | 8.86E-04 | 2.57E-02 | 1.22E-03 | 6q14.3   |         |            |               |  |
|                                                                                                  | 4   | rs1093763 | 5428143   | C  | 0.625 | 0.184 | T  | 10.31 | 7.39  | 1.32E-03 | 3.84E-02 | 1.75E-03 | 4p16.2   | T C     | STK32B     | Intron        |  |
|                                                                                                  | 8   | rs6471603 | 58517186  | C  | 0.667 | 0.195 | T  | 8.472 | 8.26  | 3.61E-03 | 1.05E-01 | 4.55E-03 | 8q12.1   |         |            |               |  |
|                                                                                                  | 11  | rs1121543 | 114616921 | A  | 0.625 | 0.221 | G  | 7.578 | 5.89  | 5.91E-03 | 1.71E-01 | 7.14E-03 | 11q23.3  | G A     | CADM1      | Intron        |  |
|                                                                                                  | 4   | rs1001786 | 16203977  | C  | 0.667 | 0.213 | A  | 7.373 | 7.41  | 6.62E-03 | 1.92E-01 | 7.68E-03 | 4p15.32  | A C     | LDB2       | Intron        |  |
|                                                                                                  | 19  | rs7250000 | 56578734  | A  | 0.625 | 0.270 | G  | 5.083 | 4.50  | 2.42E-02 | 7.01E-01 | 2.70E-02 | 19q13.41 | G A     | LIM2       | Intron        |  |
|                                                                                                  | 13  | rs7320823 | 67575838  | C  | 0.667 | 0.274 | A  | 4.637 | 5.30  | 3.13E-02 | 9.08E-01 | 3.36E-02 | 13q21.33 |         |            |               |  |
|                                                                                                  | 6   | rs2185503 | 8294510   | C  | 0.625 | 0.315 | T  | 3.545 | 3.62  | 5.97E-02 | 1.00E+00 | 6.19E-02 | 6p24.3   |         |            |               |  |
|                                                                                                  | 10  | rs1931901 | 7695358   | A  | 0.625 | 0.339 | G  | 2.908 | 3.25  | 8.81E-02 | 1.00E+00 | 8.81E-02 | 10p14    | G A     | ITIH5      | Intron        |  |
| Play                                                                                             |     |           |           |    |       |       |    |       |       |          |          |          |          |         |            |               |  |
| Q1 (N = 5)                                                                                       | CHR | SNP       | BP        | A1 | F_A   | F_U   | A2 | CHISQ | OR    | UNADJ    | BONF     | FDR_BH   | Band     | Alleles | Gene(s)    | Role          |  |
|                                                                                                  | 3   | rs333327  | 125813434 | A  | 0.000 | 0.459 | G  | 8.475 | 0.00  | 3.60E-03 | 2.52E-02 | 2.52E-02 | 3q21.2   | G A     | KALRN      | Intron        |  |
|                                                                                                  | 11  | rs713065  | 86335168  | A  | 0.000 | 0.387 | G  | 6.307 | 0.00  | 1.20E-02 | 8.42E-02 | 2.81E-02 | 11q14.2  | A G     | FZD4 (PRS' | 3utr (intron) |  |
|                                                                                                  | 1   | rs485874  | 18945513  | A  | 0.800 | 0.427 | G  | 5.687 | 5.38  | 1.71E-02 | 1.20E-01 | 2.81E-02 | 1p36.13  | A G     | PAX7       | 3utr          |  |
|                                                                                                  | 4   | rs2725769 | 105975618 | A  | 0.000 | 0.354 | G  | 5.48  | 0.00  | 1.92E-02 | 1.35E-01 | 2.81E-02 | 4q24     | G A     | RP11-556I  | 14.2          |  |
|                                                                                                  | 4   | rs2725771 | 105978188 | A  | 0.000 | 0.351 | C  | 5.408 | 0.00  | 2.00E-02 | 1.40E-01 | 2.81E-02 | 4q24     |         |            |               |  |
|                                                                                                  | 10  | rs2505956 | 27225292  | T  | 0.000 | 0.275 | C  | 3.78  | 0.00  | 5.19E-02 | 3.63E-01 | 6.05E-02 | 10p12.1  |         |            |               |  |
|                                                                                                  |     |           |           |    |       |       |    |       |       |          |          |          |          |         |            |               |  |

Social

| Q4 (N = 4) | CHR | SNP       | BP        | A1 | F_A   | F_U   | A2 | CHISQ | OR    | UNADJ    | BONF     | FDR_BH   | Band     | Alleles | Gene(s)    | Role                 |
|------------|-----|-----------|-----------|----|-------|-------|----|-------|-------|----------|----------|----------|----------|---------|------------|----------------------|
|            | 20  | rs1698945 | 39011296  | G  | 0.500 | 0.061 | A  | 26.4  | 15.30 | 2.78E-07 | 1.11E-05 | 1.11E-05 | 20q12    |         |            |                      |
|            | 9   | rs2007744 | 78044132  | A  | 0.750 | 0.144 | C  | 23.62 | 17.81 | 1.17E-06 | 4.69E-05 | 2.35E-05 | 9q21.13  | T G     | PCSK5      | intronic             |
|            | 7   | rs1095384 | 117174344 | T  | 0.500 | 0.073 | C  | 21.24 | 12.65 | 4.05E-06 | 1.62E-04 | 4.48E-05 | 7q31.2   | C T     | CTTNBP2    | intronic             |
|            | 7   | rs1176781 | 117206428 | C  | 0.500 | 0.074 | A  | 21.05 | 12.55 | 4.48E-06 | 1.79E-04 | 4.48E-05 | 7q31.31  | A C     | CTTNBP2    | intronic             |
|            | 3   | rs3907388 | 2009933   | C  | 0.500 | 0.076 | T  | 20.16 | 12.10 | 7.13E-06 | 2.85E-04 | 5.71E-05 | 3p26.3   |         |            |                      |
|            | 7   | rs1034784 | 82062116  | C  | 0.500 | 0.080 | T  | 18.93 | 11.47 | 1.36E-05 | 5.43E-04 | 9.05E-05 | 7q21.11  |         |            |                      |
|            | 13  | rs1421296 | 105057211 | A  | 0.500 | 0.082 | C  | 18.33 | 11.16 | 1.86E-05 | 7.43E-04 | 1.06E-04 | 13q33.2  |         |            |                      |
|            | 7   | rs1025221 | 53387975  | A  | 0.500 | 0.084 | G  | 17.86 | 10.92 | 2.38E-05 | 9.53E-04 | 1.19E-04 | 7p12.1   |         |            |                      |
|            | 6   | rs6902999 | 105866239 | T  | 0.500 | 0.090 | C  | 16.22 | 10.09 | 5.63E-05 | 2.25E-03 | 2.50E-04 | 6q21     | C T     | PREP       | intronic             |
|            | 14  | rs1013103 | 32319832  | A  | 0.500 | 0.091 | G  | 15.93 | 9.93  | 6.56E-05 | 2.62E-03 | 2.62E-04 | 14q12    | G A     | AKAP6      | intronic             |
|            | 3   | rs717939  | 18601746  | G  | 0.875 | 0.268 | A  | 15    | 19.17 | 1.07E-04 | 4.29E-03 | 3.90E-04 | 3p24.3   | T C     | AC144521   | intronic             |
|            | 8   | rs1044783 | 416685    | G  | 0.625 | 0.170 | A  | 11.67 | 8.13  | 6.36E-04 | 2.54E-02 | 2.12E-03 | 8p23.3   | A G     | AK056623   | 3utr                 |
|            | 11  | rs1083043 | 89541802  | G  | 0.500 | 0.118 | A  | 11.16 | 7.48  | 8.35E-04 | 3.34E-02 | 2.57E-03 | 11q14.3  | A G     | NAALAD2    | coding               |
|            | 16  | rs2911174 | 62214791  | C  | 0.875 | 0.329 | T  | 10.77 | 14.28 | 1.03E-03 | 4.13E-02 | 2.95E-03 | 16q21    |         |            |                      |
|            | 10  | rs771874  | 36266482  | A  | 0.500 | 0.106 | G  | 9.826 | 8.47  | 1.72E-03 | 6.88E-02 | 4.32E-03 | 10p11.21 |         |            |                      |
|            | 12  | rs1440092 | 95273987  | T  | 0.500 | 0.130 | C  | 9.649 | 6.70  | 1.89E-03 | 7.58E-02 | 4.32E-03 | 12q23.1  | A G     | CDK17      | intronic             |
|            | 12  | rs1050707 | 95280908  | T  | 0.500 | 0.130 | C  | 9.644 | 6.70  | 1.90E-03 | 7.60E-02 | 4.32E-03 | 12q23.1  | T C     | CDK17      | intronic             |
|            | 12  | rs7976881 | 95315077  | G  | 0.500 | 0.130 | A  | 9.603 | 6.68  | 1.94E-03 | 7.77E-02 | 4.32E-03 | 12q23.1  | G A     | CDK17      | intronic             |
|            | 19  | rs2075604 | 1169523   | T  | 0.500 | 0.132 | G  | 9.417 | 6.59  | 2.15E-03 | 8.60E-02 | 4.50E-03 | 19p13.3  | G T     | STK11      | intronic             |
|            | 2   | rs6717613 | 299480    | A  | 0.875 | 0.357 | G  | 9.333 | 12.62 | 2.25E-03 | 9.00E-02 | 4.50E-03 | 2p25.3   | G A     | AC079779   | Supstream (intronic) |
|            | 7   | rs2941543 | 47492265  | A  | 0.625 | 0.206 | G  | 8.582 | 6.44  | 3.40E-03 | 1.36E-01 | 6.47E-03 | 7p12.3   | A G     | TNS3       | intronic             |
|            | 12  | rs4608180 | 95165979  | G  | 0.500 | 0.142 | A  | 8.4   | 6.06  | 3.75E-03 | 1.50E-01 | 6.82E-03 | q23.1    | G A     | ELK3       | intronic             |
|            | 6   | rs1217953 | 18572627  | T  | 0.500 | 0.143 | G  | 8.242 | 5.97  | 4.09E-03 | 1.64E-01 | 7.12E-03 | NA       |         |            |                      |
|            | 1   | rs1329465 | 99155952  | C  | 0.500 | 0.159 | T  | 6.963 | 5.31  | 8.32E-03 | 3.33E-01 | 1.39E-02 | 1p21.3   | T C     | LPPR5      | intronic             |
|            | 8   | rs1198768 | 123131375 | A  | 0.500 | 0.170 | G  | 6.12  | 4.87  | 1.34E-02 | 5.35E-01 | 2.14E-02 | 8q24.13  | G A     | BC052578   | intronic             |
|            | 4   | rs1109763 | 99963878  | C  | 0.500 | 0.177 | T  | 5.691 | 4.64  | 1.71E-02 | 6.82E-01 | 2.56E-02 | 4q23     |         |            |                      |
|            | 3   | rs2371121 | 27825729  | G  | 0.500 | 0.178 | T  | 5.641 | 4.62  | 1.76E-02 | 7.02E-01 | 2.56E-02 | 3p24.1   | G T     | AC098973   | intronic             |
|            | 3   | rs2618111 | 27886915  | A  | 0.500 | 0.179 | G  | 5.605 | 4.60  | 1.79E-02 | 7.17E-01 | 2.56E-02 | 3p24.1   | A G     | AC098973   | intronic             |
|            | 6   | rs9501714 | 135248    | G  | 0.500 | 0.180 | A  | 5.54  | 4.56  | 1.86E-02 | 7.44E-01 | 2.56E-02 | 6p25.3   | A G     | RP3-416J7  | intronic             |
|            | 18  | rs663830  | 10594362  | C  | 0.500 | 0.213 | T  | 3.934 | 3.70  | 4.73E-02 | 1.00E+00 | 6.31E-02 | 18p11.22 | T C     | RP11-883A  | intronic             |
|            | 14  | rs1599965 | 94944160  | G  | 0.000 | 0.318 | A  | 3.732 | 0.00  | 5.34E-02 | 1.00E+00 | 6.89E-02 | 14q32.13 | T C     | LINC003413 | utr                  |
|            | 4   | rs4401453 | 99993206  | C  | 0.500 | 0.222 | T  | 3.57  | 3.51  | 5.88E-02 | 1.00E+00 | 7.20E-02 | 4q23     |         |            |                      |
|            | 17  | rs7208605 | 11222570  | G  | 0.500 | 0.222 | A  | 3.554 | 3.50  | 5.94E-02 | 1.00E+00 | 7.20E-02 | 7p12     | A G     | SHISA6     | intronic             |
|            | 6   | rs1408267 | 18530528  | G  | 0.500 | 0.228 | A  | 3.347 | 3.38  | 6.73E-02 | 1.00E+00 | 7.80E-02 | 6p22.3   | T C     | RNF144B    | intronic             |
|            | 17  | rs8068118 | 11256344  | A  | 0.500 | 0.229 | G  | 3.312 | 3.36  | 6.88E-02 | 1.00E+00 | 7.80E-02 | 17p12    | G A     | SHISA6     | intronic             |
|            | 9   | rs328012  | 107077538 | G  | 0.500 | 0.230 | T  | 3.277 | 3.35  | 7.02E-02 | 1.00E+00 | 7.80E-02 | 9q31.1   | A C     | SLC44A1    | intronic             |
|            | 6   | rs567698  | 18562822  | T  | 0.500 | 0.234 | G  | 3.139 | 3.27  | 7.64E-02 | 1.00E+00 | 8.26E-02 | 6p22.3   | T G     | RNF144B    | intronic             |
|            | 2   | rs1684465 | 196653630 | T  | 0.500 | 0.240 | C  | 2.964 | 3.17  | 8.51E-02 | 1.00E+00 | 8.80E-02 | 2q32.3   |         |            |                      |
|            | 2   | rs4395260 | 196675582 | A  | 0.500 | 0.240 | G  | 2.952 | 3.16  | 8.58E-02 | 1.00E+00 | 8.80E-02 | 2q32.3   |         |            |                      |

Perseverative Behaviors

| Q1 (N = 7) | CHR | SNP       | BP        | A1 | F_A   | F_U   | A2 | CHISQ | OR   | UNADJ    | BONF     | FDR_BH   | Band     | Alleles | Gene(s)   | Role   |
|------------|-----|-----------|-----------|----|-------|-------|----|-------|------|----------|----------|----------|----------|---------|-----------|--------|
|            | 23  | rs1974522 | 3248733   | G  | 0.000 | 0.443 | A  | 7.939 | 0.00 | 4.84E-03 | 7.74E-02 | 4.73E-02 | 23p22.33 | G A C   | MXRA5     | Coding |
|            | 13  | rs1050800 | 92952411  | G  | 0.857 | 0.498 | A  | 7.205 | 6.05 | 7.27E-03 | 1.16E-01 | 4.73E-02 | 13q31.3  | A/G     | GPC6      | Intron |
|            | 2   | rs4641966 | 73444314  | A  | 0.000 | 0.299 | G  | 5.972 | 0.00 | 1.45E-02 | 2.33E-01 | 4.73E-02 | 2p13.1   |         |           |        |
|            | 2   | rs6546824 | 73440839  | A  | 0.000 | 0.298 | G  | 5.945 | 0.00 | 1.48E-02 | 2.36E-01 | 4.73E-02 | 2p13.1   |         |           |        |
|            | 2   | rs1019151 | 73411911  | A  | 0.000 | 0.289 | G  | 5.693 | 0.00 | 1.70E-02 | 2.73E-01 | 4.73E-02 | 2p13.1   |         |           |        |
|            | 8   | rs7828540 | 72258791  | A  | 0.000 | 0.287 | G  | 5.621 | 0.00 | 1.78E-02 | 2.84E-01 | 4.73E-02 | 8q13.3   | A G     | RP11-326E | Intron |
|            | 11  | rs1089161 | 113381063 | T  | 0.071 | 0.346 | C  | 4.645 | 0.15 | 3.11E-02 | 4.98E-01 | 6.92E-02 | 11q23.2  |         |           |        |
|            | 16  | rs410059  | 78212573  | C  | 0.214 | 0.497 | T  | 4.464 | 0.28 | 3.46E-02 | 5.54E-01 | 6.92E-02 | 16q23.2  |         |           |        |
|            | 10  | rs1074956 | 89882080  | G  | 0.143 | 0.412 | A  | 4.186 | 0.24 | 4.08E-02 | 6.52E-01 | 7.25E-02 | 10q23.31 | A G     | RNLS      | 3utr   |
|            | 11  | rs4938066 | 113390622 | G  | 0.071 | 0.321 | A  | 3.993 | 0.16 | 4.57E-02 | 7.31E-01 | 7.31E-02 | 11q23.2  |         |           |        |
|            | 11  | rs7395845 | 70920892  | C  | 0.071 | 0.299 | A  | 3.449 | 0.18 | 6.33E-02 | 1.00E+00 | 9.21E-02 | 11q13.4  |         |           |        |
|            | 12  | rs1073593 | 65340149  | T  | 0.000 | 0.190 | C  | 3.273 | 0.00 | 7.04E-02 | 1.00E+00 | 9.39E-02 | 12q14.3  | T C     | GRIP1     | Intron |

| Q4 (N = 6) | CHR | SNP       | BP        | A1 | F_A   | F_U   | A2 | CHISQ | OR    | UNADJ    | BONF     | FDR_BH   | Band     | Alleles | Gene(s)   | Role   |
|------------|-----|-----------|-----------|----|-------|-------|----|-------|-------|----------|----------|----------|----------|---------|-----------|--------|
|            | 9   | rs7031476 | 15047624  | A  | 0.667 | 0.168 | G  | 21.1  | 9.88  | 4.35E-06 | 6.96E-05 | 6.96E-05 | 9p22.3   | G A     | AK127963  | Intron |
|            | 11  | rs2509094 | 95360556  | A  | 0.500 | 0.126 | G  | 15.11 | 6.94  | 1.01E-04 | 1.62E-03 | 8.11E-04 | 11q21    | G A     | MAML2     | Intron |
|            | 10  | rs1074956 | 89882080  | G  | 0.917 | 0.412 | A  | 12.55 | 15.68 | 3.95E-04 | 6.32E-03 | 1.40E-03 | 10q23.31 | A G     | RNLS      | 3utr   |
|            | 8   | rs7828540 | 72258791  | A  | 0.750 | 0.287 | G  | 12.53 | 7.46  | 4.00E-04 | 6.39E-03 | 1.40E-03 | 8q13.3   | A G     | RP11-326E | Intron |
|            | 16  | rs410059  | 78212573  | C  | 1.000 | 0.497 | T  | 12.11 | NA    | 5.01E-04 | 8.02E-03 | 1.40E-03 | 16q23.2  |         |           |        |
|            | 12  | rs1073593 | 65340149  | T  | 0.583 | 0.190 | C  | 12.03 | 5.99  | 5.23E-04 | 8.37E-03 | 1.40E-03 | 12q14.3  | T C     | GRIP1     | Intron |
|            | 11  | rs1089161 | 113381063 | T  | 0.750 | 0.346 | C  | 8.642 | 5.68  | 3.28E-03 | 5.26E-02 | 7.32E-03 | 11q23.2  |         |           |        |
|            | 8   | rs184487  | 26404795  | C  | 0.583 | 0.232 | A  | 8.289 | 4.64  | 3.99E-03 | 6.38E-02 | 7.32E-03 | 8p21.2   | C A     | BNIP3L    | Intron |
|            | 13  | rs1050800 | 92952411  | G  | 0.083 | 0.498 | A  | 8.231 | 0.09  | 4.12E-03 | 6.59E-02 | 7.32E-03 | 13q31.3  | A G     | GPC6      | Intron |
|            | 8   | rs189025  | 26393432  | A  | 0.583 | 0.241 | G  | 7.64  | 4.41  | 5.71E-03 | 9.14E-02 | 8.85E-03 | 8p21.2   |         | BNIP3L    | Intron |
|            | 23  | rs1974522 | 3248733   | G  | 1.000 | 0.443 | A  | 7.526 | NA    | 6.08E-03 | 9.73E-02 | 8.85E-03 | 23p22.33 | G A C   | MXRA5     | Coding |
|            | 11  | rs4938066 | 113390622 | G  | 0.667 | 0.321 | A  | 6.556 | 4.23  | 1.05E-02 | 1.67E-01 | 1.39E-02 | 11q23.2  |         |           |        |
|            | 11  | rs7395845 | 70920892  | C  | 0.583 | 0.299 | A  | 4.619 | 3.29  | 3.16E-02 | 5.06E-01 | 3.89E-02 | 11q13.4  |         |           |        |
