# Supplementary material for: ASD Phenotype—Genotype Associations in Concordant and Discordant Monozygotic and Dizygotic Twins Stratified by Severity of Autistic Traits
Source: MDPI journal article supplement (doi:10.3390/ijms20153804), 2019-08-03
Supplement: s1 [file s1]

| <b>Social</b>                  |            |           |          |         |              |                     |             |           |
|--------------------------------|------------|-----------|----------|---------|--------------|---------------------|-------------|-----------|
| CHR                            | SNP        | BP        | P        | Band    | Genes        | Role                | aa Position | aa Change |
| 8                              | rs7836486  | 47062007  | 1.60E-06 | q11.1   |              |                     |             |           |
| 8                              | rs359782   | 47302891  | 1.65E-06 | q11.1   |              |                     |             |           |
| 7                              | rs10486903 | 88621188  | 1.85E-06 | q21.13  | ZNF804B      | intronic            |             |           |
| 7                              | rs7787455  | 88588409  | 2.18E-06 | q21.13  | ZNF804B      | intronic            |             |           |
| 5                              | rs6556348  | 157807809 | 2.43E-06 | q33.3   | RP11-542A14. | non-coding intronic |             |           |
| 7                              | rs7795594  | 36794360  | 2.44E-06 | p14.2   |              |                     |             |           |
| 7                              | rs9986865  | 36807127  | 2.44E-06 | p14.2   |              |                     |             |           |
| 8                              | rs10100027 | 73553339  | 3.20E-06 | q13.3   |              |                     |             |           |
| 8                              | rs11136142 | 47240116  | 3.58E-06 | q11.1   |              |                     |             |           |
| 8                              | rs4873076  | 47255301  | 3.58E-06 | q11.1   |              |                     |             |           |
| 8                              | rs359807   | 47309786  | 3.58E-06 | q11.1   |              |                     |             |           |
| 8                              | rs7827943  | 73568186  | 4.81E-06 | q13.3   |              |                     |             |           |
| 10                             | rs4880592  | 3163581   | 5.13E-06 | p15.2   | PFKP         | intronic            |             |           |
| <b>Perseverative Behaviors</b> |            |           |          |         |              |                     |             |           |
| CHR                            | SNP        | BP        | P        | Band    | Genes        | Role                | aa Position |           |
| 5                              | rs324454   | 55238308  | 2.40E-06 | 12p13.1 | APOLD1       | Downstream          | -           |           |
| 12                             | rs2058604  | 12841126  | 3.71E-06 | 5q11.2  | IL31RA       | Intron              | -           |           |
| 11                             | rs4930028  | 2889641   | 4.46E-06 | 11p15.4 | SLC22A18     | Intron              | -           |           |
| 11                             | rs7926034  | 90154444  | 8.39E-06 | 11q14.3 |              |                     |             |           |
