# Supplementary material for: ASD Phenotype—Genotype Associations in Concordant and Discordant Monozygotic and Dizygotic Twins Stratified by Severity of Autistic Traits
Source: MDPI journal article supplement (doi:10.3390/ijms20153804), 2019-08-03
Supplement: s1 [file s1]

| All trait QTNs for dNA.MZ twins |            |           |          |        |              |                     |             |           |
|---------------------------------|------------|-----------|----------|--------|--------------|---------------------|-------------|-----------|
| Language                        |            |           |          |        |              |                     |             |           |
| CHR                             | SNP        | BP        | P        | Band   | Genes        | Role                | aa Position | aa Change |
| 2                               | rs10490230 | 50391831  | 1.22E-07 | p16.3  | NRXN1        | intronic            |             |           |
| 12                              | rs11057881 | 123937926 | 1.22E-07 | q24.31 |              |                     |             |           |
| 7                               | rs1553841  | 47510767  | 1.22E-07 | p12.3  | TNS3         | intronic            |             |           |
| 8                               | rs604302   | 37123727  | 1.22E-07 | p11.23 |              |                     |             |           |
| 2                               | rs3791289  | 134827909 | 7.96E-07 | q21.3  | MGAT5        | intronic            |             |           |
| 4                               | rs10033190 | 118435301 | 9.69E-07 | q26    |              |                     |             |           |
| 5                               | rs3896348  | 18204313  | 1.02E-06 | p15.1  |              |                     |             |           |
| 7                               | rs10238376 | 30940878  | 1.31E-06 | p14.3  |              |                     |             |           |
| 8                               | rs2618806  | 2111558   | 1.31E-06 | p23.3  |              |                     |             |           |
| 2                               | rs6742060  | 238234971 | 1.31E-06 | q37.3  | LRRFIP1      | intronic            |             |           |
| 2                               | rs1568854  | 149633823 | 1.50E-06 | q23.2  | LYPD6B       | intronic            |             |           |
| 12                              | rs1996749  | 102245143 | 1.65E-06 | q23.2  | C12orf42     | intronic            |             |           |
| 15                              | rs12915265 | 30196358  | 2.16E-06 | q13.3  | CHRNA7       | non-coding intronic |             |           |
| 11                              | rs544978   | 62441806  | 2.16E-06 | q12.3  | CHRM1        | intronic            |             |           |
| 6                               | rs4443522  | 129211626 | 3.37E-06 | q22.33 |              |                     |             |           |
| 6                               | rs4487603  | 129211602 | 3.37E-06 | q22.33 |              |                     |             |           |
| 1                               | rs783036   | 66603958  | 3.37E-06 | p31.3  | PDE4B        | coding              | 1451        | E>E       |
| 11                              | rs11041537 | 7671750   | 4.04E-06 | p15.4  | OVCH2        | intronic            |             |           |
| 5                               | rs12521575 | 18187934  | 4.04E-06 | p15.1  |              |                     |             |           |
| 3                               | rs4521229  | 181973610 | 4.04E-06 | q26.33 | LOC101928882 | non-coding intronic |             |           |
| 5                               | rs923963   | 62075399  | 4.04E-06 | q12.1  |              |                     |             |           |
| 6                               | rs12525297 | 107246561 | 4.21E-06 | q21    |              |                     |             |           |
| 1                               | rs3766793  | 53363218  | 4.21E-06 | p32.3  | SLC1A7       | non-coding intronic |             |           |
| 14                              | rs10151666 | 33007535  | 4.34E-06 | q13.1  | NPAS3        | intronic            |             |           |
| 8                               | rs10956504 | 131051089 | 5.25E-06 | q24.21 | FAM49B       | non-coding intronic |             |           |
| 8                               | rs921693   | 131074193 | 5.72E-06 | q24.21 | FAM49B       | non-coding intronic |             |           |
|                                 |            |           |          |        |              |                     |             |           |
|                                 |            |           |          |        |              |                     |             |           |
| Nonverbal                       |            |           |          |        |              |                     |             |           |

| CHR  | SNP        | BP        | P        | Band   | Genes        | Role                 | aa Position | aa Change |
|------|------------|-----------|----------|--------|--------------|----------------------|-------------|-----------|
| 6    | rs1414743  | 142319462 | 5.21E-07 | q24.1  | AK097143     | intronic             |             |           |
| 6    | rs2185503  | 8294510   | 5.21E-07 | p24.3  |              |                      |             |           |
| 19   | rs4808521  | 16646721  | 5.21E-07 | p13.11 | TMEM38A      | intronic             |             |           |
| 11   | rs7951632  | 110358395 | 5.21E-07 | q23.1  |              |                      |             |           |
| 4    | rs10017860 | 16203977  | 7.66E-07 | p15.32 | LDB2/MIR548A | intronic/3downstream |             |           |
| 20   | rs2300216  | 3894057   | 8.15E-07 | p13    | RNF24        | intronic             |             |           |
| 3    | rs3872649  | 245521    | 8.15E-07 | p26.3  | CHL1         | intronic             |             |           |
| 19   | rs7250000  | 56578734  | 8.15E-07 | q13.41 | LIM2         | intronic             |             |           |
| 10   | rs1931901  | 7695358   | 9.43E-07 | p14    | ITIH5        | intronic             |             |           |
| 12   | rs10777986 | 98353626  | 9.62E-07 | q23.1  | ANKS1B       | intronic             |             |           |
| 11   | rs11215438 | 114616921 | 1.26E-06 | q23.3  | CADM1        | intronic             |             |           |
| 22   | rs739140   | 36445502  | 1.26E-06 | q13.1  | TRIOBP       | intronic             |             |           |
| 4    | rs10937638 | 5428143   | 1.47E-06 | p16.2  | STK32B       | intronic             |             |           |
| 1    | rs11120063 | 211141648 | 1.80E-06 | q32.3  |              |                      |             |           |
| 1    | rs1284851  | 211139989 | 1.80E-06 | q32.3  | FLVCR1       | 3downstream          |             |           |
| 5    | rs42914    | 36771041  | 1.80E-06 | p13.2  |              |                      |             |           |
| 3    | rs7628531  | 72684645  | 1.80E-06 | p13    |              |                      |             |           |
| 6    | rs2256028  | 31487177  | 2.11E-06 | p21.33 | MICA         | intronic             |             |           |
| 17   | rs11079427 | 56810004  | 3.92E-06 | q23.2  | BCAS3        | intronic             |             |           |
| 1    | rs16833356 | 234358516 | 3.92E-06 | q42.3  |              |                      |             |           |
| 3    | rs2010479  | 127860189 | 3.92E-06 | q21.3  | NUP210P1     | 5upstream            |             |           |
| 2    | rs6745492  | 237172556 | 3.92E-06 | q37.3  |              |                      |             |           |
| 4    | rs737601   | 9762331   | 3.92E-06 | p16.1  |              |                      |             |           |
| 3    | rs7628233  | 127878243 | 3.92E-06 | q21.3  |              |                      |             |           |
| 13   | rs7320823  | 67575838  | 4.55E-06 | q21.33 |              |                      |             |           |
| 2    | rs2072474  | 102005641 | 4.85E-06 | q11.2  | IL1R2        | non-coding intronic  |             |           |
| 8    | rs6471603  | 58517186  | 6.43E-06 | q12.1  |              |                      |             |           |
| 20   | rs6062894  | 61425120  | 9.83E-06 | q13.33 | COL20A1      | intronic             |             |           |
| 6    | rs663614   | 87491867  | 9.83E-06 | q14.3  |              |                      |             |           |
| Play |            |           |          |        |              |                      |             |           |

| CHR           | SNP        | BP        | P        | Band   | Genes         | Role                | aa Position | aa Change |
|---------------|------------|-----------|----------|--------|---------------|---------------------|-------------|-----------|
| 3             | rs333327   | 125813434 | 2.67E-06 | q21.2  | KALRN         | intronic            |             |           |
| 1             | rs485874   | 18945513  | 3.81E-06 | p36.13 | PAX7          | 3utr                |             |           |
| 10            | rs2505956  | 27225292  | 4.24E-06 | p12.1  |               |                     |             |           |
| 11            | rs713065   | 86335168  | 5.06E-06 | q14.2  | FZD4          | 3utr                |             |           |
| 12            | rs4523751  | 89842084  | 6.06E-06 | q21.33 | LINC00615     | non-coding intronic |             |           |
| 4             | rs2725769  | 105975618 | 9.03E-06 | q24    | RP11-556I14.2 | non-coding intronic |             |           |
| 4             | rs2725771  | 105978188 | 9.03E-06 | q24    | RP11-556I14.2 | non-coding intronic |             |           |
| <b>Social</b> |            |           |          |        |               |                     |             |           |
| CHR           | SNP        | BP        | P        | Band   | Genes         | Role                | aa Position | aa Change |
| 2             | rs6717613  | 299480    | 3.07E-07 | p25.3  | AC079779.5    | Supstream           |             |           |
| 6             | rs6902999  | 105866239 | 5.43E-07 | q21    | PREP          | intronic            |             |           |
| 8             | rs11987687 | 123131375 | 5.83E-07 | q24.13 |               |                     |             |           |
| 13            | rs1421296  | 105057211 | 5.83E-07 | q33.2  |               |                     |             |           |
| 7             | rs2941543  | 47492265  | 1.33E-06 | p12.3  | TNS3          | intronic            |             |           |
| 14            | rs10131032 | 32319832  | 2.00E-06 | q12    | AKAP6         | intronic            |             |           |
| 7             | rs10252217 | 53387975  | 2.00E-06 | p12.1  |               |                     |             |           |
| 7             | rs1034784  | 82062116  | 2.00E-06 | q21.11 |               |                     |             |           |
| 12            | rs10507071 | 95280908  | 2.00E-06 | q23.1  | CDK17         | intronic            |             |           |
| 11            | rs10830430 | 89541802  | 2.00E-06 | q14.3  | NAALAD2       | coding              | 446         | I>V       |
| 7             | rs10953849 | 117174344 | 2.00E-06 | q31.2  | CTTNBP2       | intronic            |             |           |
| 4             | rs11097637 | 99963878  | 2.00E-06 | q23    |               |                     |             |           |
| 7             | rs11767812 | 117206428 | 2.00E-06 | q31.31 | CTTNBP2       | intronic            |             |           |
| 6             | rs12179534 | 18572627  | 2.00E-06 |        |               |                     |             |           |
| 1             | rs1329465  | 99155952  | 2.00E-06 | p21.3  | LPPR5         | intronic            |             |           |
| 6             | rs1408267  | 18530528  | 2.00E-06 | p22.3  | RNF144B       | intronic            |             |           |
| 12            | rs1440092  | 95273987  | 2.00E-06 | q23.1  | CDK17         | intronic            |             |           |
| 2             | rs16844650 | 196653630 | 2.00E-06 | q32.3  |               |                     |             |           |
| 20            | rs16989457 | 39011296  | 2.00E-06 | q12    |               |                     |             |           |
| 19            | rs2075604  | 1169523   | 2.00E-06 | p13.3  | STK11         | intronic            |             |           |
| 3             | rs2371121  | 27825729  | 2.00E-06 | p24.1  | AC098973.2    | non-coding intronic |             |           |

|                                |            |           |          |        |              |                     |             |           |
|--------------------------------|------------|-----------|----------|--------|--------------|---------------------|-------------|-----------|
| 3                              | rs2618111  | 27886915  | 2.00E-06 | p24.1  | AC098973.2   | non-coding intronic |             |           |
| 9                              | rs328012   | 107077538 | 2.00E-06 | q31.1  | SLC44A1      | intronic            |             |           |
| 3                              | rs3907388  | 2009933   | 2.00E-06 | p26.3  |              |                     |             |           |
| 2                              | rs4395260  | 196675582 | 2.00E-06 | q32.3  |              |                     |             |           |
| 4                              | rs4401453  | 99993206  | 2.00E-06 | q23    |              |                     |             |           |
| 12                             | rs4608180  | 95165979  | 2.00E-06 | q23.1  | ELK3         | intronic            |             |           |
| 6                              | rs567698   | 18562822  | 2.00E-06 | p22.3  | RNF144B      | intronic            |             |           |
| 18                             | rs663830   | 10594362  | 2.00E-06 | p11.22 |              |                     |             |           |
| 15                             | rs7183453  | 69641001  | 2.00E-06 | q23    | THSD4        | intronic            |             |           |
| 17                             | rs7208605  | 11222570  | 2.00E-06 | p12    | SHISA6       | intronic            |             |           |
| 12                             | rs7976881  | 95315077  | 2.00E-06 | q23.1  | CDK17        | intronic            |             |           |
| 17                             | rs8068118  | 11256344  | 2.00E-06 | p12    | SHISA6       | intronic            |             |           |
| 6                              | rs9501714  | 135248    | 2.00E-06 | p25.3  | RP3-416J7.4  | non-coding intronic |             |           |
| 14                             | rs1599965  | 94944160  | 2.67E-06 | q32.13 | LINC00341    | non-coding          |             |           |
| 10                             | rs771874   | 36266482  | 3.54E-06 | p11.21 |              |                     |             |           |
| 3                              | rs717939   | 18601746  | 4.63E-06 | p24.3  | AC144521.1   | non-coding intronic |             |           |
| 9                              | rs2007744  | 78044132  | 7.68E-06 | q21.13 | PCSK5        | intronic            |             |           |
| 16                             | rs2911174  | 62214791  | 8.60E-06 | q21    |              |                     |             |           |
| 8                              | rs1044783  | 416685    | 9.25E-06 | p23.3  | RP11-91J19.4 | non-coding          |             |           |
|                                |            |           |          |        |              |                     |             |           |
| <b>Perseverative Behaviors</b> |            |           |          |        |              |                     |             |           |
| CHR                            | SNP        | BP        | P        | Band   | Genes        | Role                | aa Position | aa Change |
| 2                              | rs10191517 | 73411911  | 1.35E-06 | p13.1  |              |                     |             |           |
| 2                              | rs4641966  | 73444314  | 1.35E-06 | p13.1  |              |                     |             |           |
| 2                              | rs6546824  | 73440839  | 1.35E-06 | p13.1  |              |                     |             |           |
| 23                             | rs1974522  | 3248733   | 1.72E-06 | p22.33 | MXRA5        | coding              | 1665        | P>S A     |
| 11                             | rs2509094  | 95360556  | 1.76E-06 | q21    | MAML2        | intronic            |             |           |
| 11                             | rs10891615 | 113381063 | 2.80E-06 | q23.2  |              |                     |             |           |
| 16                             | rs410059   | 78212573  | 4.25E-06 | q23.2  |              |                     |             |           |
| 12                             | rs10735937 | 65340149  | 5.17E-06 | q14.3  | GRIP1        | intronic            |             |           |
| 11                             | rs4938066  | 113390622 | 6.37E-06 | q23.2  |              |                     |             |           |
| 9                              | rs7031476  | 15047624  | 7.73E-06 | p22.3  | RP11-54D18.4 | 3downstream         |             |           |

|    |            |          |          |        |               |                     |  |  |
|----|------------|----------|----------|--------|---------------|---------------------|--|--|
| 8  | rs7828540  | 72258791 | 8.12E-06 | q13.3  | RP11-326E22.1 | non-coding intronic |  |  |
| 13 | rs10508006 | 92952411 | 8.33E-06 | q31.3  | GPC6          | intronic            |  |  |
| 10 | rs10749565 | 89882080 | 8.33E-06 | q23.31 | RNLS          | 3utr                |  |  |
| 8  | rs184487   | 26404795 | 9.59E-06 | p21.2  | BNIP3L        | intronic            |  |  |
| 8  | rs189025   | 26393432 | 9.59E-06 | p21.2  | BNIP3L        | intronic            |  |  |
| 11 | rs7395845  | 70920892 | 9.59E-06 | q13.4  |               |                     |  |  |
