# Supplementary material for: ASD Phenotype—Genotype Associations in Concordant and Discordant Monozygotic and Dizygotic Twins Stratified by Severity of Autistic Traits
Source: MDPI journal article supplement (doi:10.3390/ijms20153804), 2019-08-03
Supplement: s1 [file s1]

| Summary of case-control by quartile analyses of dA.MZ twins |     |           |           |    |         |        |    |       |        |          |          |          |          |         |          |                   |
|-------------------------------------------------------------|-----|-----------|-----------|----|---------|--------|----|-------|--------|----------|----------|----------|----------|---------|----------|-------------------|
| Language                                                    |     |           |           |    |         |        |    |       |        |          |          |          |          |         |          |                   |
| Q1 (N = 4)                                                  | CHR | SNP       | BP        | A1 | F_A     | F_U    | A2 | CHISQ | OR     | UNADJ P  | BONF     | FDR_BH   | Band     | Alleles | Gene(s)  | Role              |
|                                                             | 17  | rs756785  | 27836958  | A  | 0.875   | 0.4267 | G  | 6.56  | 9.406  | 0.01043  | 0.09389  | 0.09389  | 17q11.2  | A/G     | CDK5R1   | Promoter          |
|                                                             |     |           |           |    |         |        |    |       |        |          |          |          |          |         |          |                   |
| Q4 (N = 7)                                                  | CHR | SNP       | BP        | A1 | F_A     | F_U    | A2 | CHISQ | OR     | UNADJ P  | BONF     | FDR_BH   | Band     | Alleles | Gene(s)  | Role              |
|                                                             | 7   | rs1027519 | 85436760  | A  | 0.5     | 0.1249 | G  | 17.83 | 7.003  | 2.42E-05 | 0.000218 | 0.000119 | 7q21.11  | A/G     |          |                   |
|                                                             | 7   | rs7785694 | 85431498  | A  | 0.5     | 0.1257 | G  | 17.66 | 6.954  | 2.64E-05 | 0.000237 | 0.000119 | 7q21.11  | A/G     |          |                   |
|                                                             | 11  | rs1809063 | 131636242 | C  | 0.9286  | 0.4592 | T  | 12.38 | 15.31  | 0.000434 | 0.003904 | 0.001301 | 11q25    | C/T     | NTM      | Intron            |
|                                                             | 13  | rs9594670 | 41529489  | C  | 0.5     | 0.1803 | T  | 8.246 | 4.545  | 0.004085 | 0.03676  | 0.009191 | 13q14.11 | C/T     | DGKH     | Intron            |
|                                                             | 17  | rs756785  | 27836958  | A  | 0.07143 | 0.4267 | G  | 7.206 | 0.1034 | 0.007267 | 0.0654   | 0.01308  | 17q11.2  | A/G     | CDK5R1   | Promoter          |
|                                                             | 1   | rs2774285 | 114443208 | T  | 0.5     | 0.2328 | C  | 5.568 | 3.296  | 0.01829  | 0.1647   | 0.02744  | 1p13.2   | C/T     | SYT6     | Intron (boundary) |
|                                                             | 9   | rs2809445 | 127988530 | T  | 0.5     | 0.2489 | C  | 4.701 | 3.018  | 0.03015  | 0.2714   | 0.03877  | 9q33.3   | C/T     |          |                   |
|                                                             |     |           |           |    |         |        |    |       |        |          |          |          |          |         |          |                   |
| Nonverbal                                                   |     |           |           |    |         |        |    |       |        |          |          |          |          |         |          |                   |
| Q1 (N = 5)                                                  | CHR | SNP       | BP        | A1 | F_A     | F_U    | A2 | CHISQ | OR     | UNADJ P  | BONF     | FDR_BH   | Band     | Alleles | Gene(s)  | Role              |
|                                                             | 10  | rs1836470 | 45099325  | C  | 0       | 0.4107 | T  | 6.959 | 0      | 0.008338 | 0.02502  | 0.02502  | 10q11.21 | C/T     |          |                   |
|                                                             | 7   | rs6462639 | 36019937  | G  | 0       | 0.3302 | A  | 4.925 | 0      | 0.02648  | 0.07943  | 0.03972  | 7p14.2   | A/G     |          |                   |
|                                                             | 17  | rs1108018 | 27707111  | A  | 0.1     | 0.4042 | G  | 3.836 | 0.1638 | 0.05015  | 0.1504   | 0.05015  | 17q11.2  | A/G     | ZNF207   | Intron            |
|                                                             |     |           |           |    |         |        |    |       |        |          |          |          |          |         |          |                   |
| Q4 (N = 6)                                                  | CHR | SNP       | BP        | A1 | F_A     | F_U    | A2 | CHISQ | OR     | UNADJ    | BONF     | FDR_BH   | Band     | Alleles | Gene(s)  | Role              |
|                                                             | 10  | rs1836470 | 45099325  | C  | 0.9167  | 0.4107 | T  | 12.65 | 15.78  | 0.000376 | 0.001127 | 0.001127 | 10q11.21 | C/T     |          |                   |
|                                                             | 17  | rs1108018 | 27707111  | A  | 0.8333  | 0.4042 | G  | 9.146 | 7.37   | 0.002492 | 0.007476 | 0.003738 | 17q11.2  | A/G     | ZNF207   | Intron            |
|                                                             | 7   | rs6462639 | 36019937  | G  | 0.6667  | 0.3302 | A  | 6.12  | 4.057  | 0.01336  | 0.04009  | 0.01336  | 7p14.2   | A/G     |          |                   |
|                                                             |     |           |           |    |         |        |    |       |        |          |          |          |          |         |          |                   |
| Play                                                        |     |           |           |    |         |        |    |       |        |          |          |          |          |         |          |                   |
| Q1 (N = 3)                                                  | CHR | SNP       | BP        | A1 | F_A     | F_U    | A2 | CHISQ | OR     | UNADJ P  | BONF     | FDR_BH   | Band     | Alleles | Gene(s)  | Role              |
|                                                             | 2   | rs355810  | 165393892 | C  | 1       | 0.3692 | T  | 10.23 | NA     | 0.00138  | 0.002761 | 0.002207 | 2q24.3   | C/T     | COBLL1   | Intron            |
|                                                             | 18  | rs8088744 | 64685792  | T  | 1       | 0.3899 | G  | 9.369 | NA     | 0.002207 | 0.004414 | 0.002207 | 18q22.1  | G/T     | CCDC102B | Intron            |
|                                                             |     |           |           |    |         |        |    |       |        |          |          |          |          |         |          |                   |
| Q4 (N = 5)                                                  | CHR | SNP       | BP        | A1 | F_A     | F_U    | A2 | CHISQ | OR     | UNADJ    | BONF     | FDR_BH   | Band     | Alleles | Gene(s)  | Role              |
|                                                             | 2   | rs355810  | 165393892 | C  | 0       | 0.3692 | T  | 5.845 | 0      | 0.01562  | 0.03125  | 0.03125  | 2q24.3   | C/T     | COBLL1   | Intron            |
|                                                             |     |           |           |    |         |        |    |       |        |          |          |          |          |         |          |                   |
| Social                                                      |     |           |           |    |         |        |    |       |        |          |          |          |          |         |          |                   |
| Q1 (N = 5)                                                  | CHR | SNP       | BP        | A1 | F_A     | F_U    | A2 | CHISQ | OR     | UNADJ P  | BONF     | FDR_BH   | Band     | Alleles | Gene(s)  | Role              |
|                                                             | 23  | rs2097402 | 133945220 | A  | 1       | 0.3131 | G  | 13.12 | NA     | 0.000293 | 0.003511 | 0.003511 | Xq26.3   | A/G     | LOC64453 | Promoter          |
|                                                             | 5   | rs2287672 | 79125284  | A  | 0.7     | 0.2818 | G  | 8.609 | 5.947  | 0.003346 | 0.04015  | 0.01355  | 5q14.1   | A/G     | CMYA5    | Intron (boundary) |
|                                                             | 19  | rs3826861 | 50748460  | G  | 0.8     | 0.3557 | A  | 8.586 | 7.245  | 0.003388 | 0.04066  | 0.01355  | 19q13.32 | A/G     | OPA3     | Intron            |
|                                                             | 10  | rs7070581 | 126159363 | A  | 0.5     | 0.1763 | G  | 7.181 | 4.673  | 0.007367 | 0.08841  | 0.0221   | 10q26.13 | A/G     | LHPP     | Intron            |
|                                                             | 19  | rs1264226 | 50755007  | G  | 0.8     | 0.41   | A  | 6.27  | 5.756  | 0.01228  | 0.1473   | 0.02947  | 19q13.32 | A/G     | OPA3     | Intron            |
|                                                             | 4   | rs1172317 | 187648291 | A  | 0       | 0.3301 | C  | 4.923 | 0      | 0.0265   | 0.318    | 0.053    | 4q35.2   | A/C     |          |                   |
|                                                             | 3   | rs4856450 | 83388138  | A  | 0.1     | 0.4193 | G  | 4.181 | 0.1539 | 0.04088  | 0.4906   | 0.07008  | 3p12.2   | A/G     |          |                   |
|                                                             | 10  | rs521331  | 8264856   | T  | 0.5     | 0.2447 | C  | 3.515 | 3.087  | 0.06082  | 0.7298   | 0.09123  | 10p14    | C/T     |          |                   |
|                                                             |     |           |           |    |         |        |    |       |        |          |          |          |          |         |          |                   |
| Q4 (N = 5)                                                  | CHR | SNP       | BP        | A1 | F_A     | F_U    | A2 | CHISQ | OR     | UNADJ P  | BONF     | FDR_BH   | Band     | Alleles | Gene(s)  | Role              |
|                                                             | 3   | rs4856450 | 83388138  | A  | 0.9     | 0.4193 | G  | 9.463 | 12.46  | 0.002097 | 0.02516  | 0.02516  | 3p12.2   | A/G     |          |                   |
|                                                             | 23  | rs5962427 | 103575337 | T  | 1       | 0.4583 | C  | 7.077 | NA     | 0.007808 | 0.0937   | 0.03372  | Xq22.2   | C/T     |          |                   |
|                                                             | 19  | rs1264226 | 50755007  | G  | 0       | 0.41   | A  | 6.94  | 0      | 0.008429 | 0.1011   | 0.03372  | 19q13.32 | A/G     | OPA3     | Intron            |
|                                                             | 19  | rs3826861 | 50748460  | G  | 0       | 0.3557 | A  | 5.515 | 0      | 0.01886  | 0.2263   | 0.05657  | 19q13.32 | A/G     | OPA3     | Intron            |
|                                                             | 5   | rs2287672 | 79125284  | A  | 0       | 0.2818 | G  | 3.92  | 0      | 0.04771  | 0.5725   | 0.08638  | 5q14.1   | A/G     | CMYA5    | Intron (boundary) |
|                                                             | 12  | rs1050586 | 20228698  | A  | 0       | 0.2669 | G  | 3.639 | 0      | 0.05645  | 0.6774   | 0.08638  | 12p12.2  | A/G     |          |                   |
|                                                             | 1   | rs1110264 | 113872742 | C  | 0       | 0.26   | T  | 3.51  | 0      | 0.061    | 0.732    | 0.08638  | 1p13.2   | C/T     | MAGI3    | Intron            |
|                                                             | 1   | rs1110262 | 113761409 | A  | 0       | 0.2572 | G  | 3.46  | 0      | 0.06287  | 0.7545   | 0.08638  | 1p13.2   | A/G     | MAGI3    | Intron            |
|                                                             | 4   | rs1172317 | 187648291 | A  | 0.6     | 0.3301 | C  | 3.284 | 3.044  | 0.06995  | 0.8394   | 0.08638  | 4q35.2   | A/C     |          |                   |
|                                                             | 10  | rs521331  | 8264856   | T  | 0       | 0.2447 | C  | 3.237 | 0      | 0.07198  | 0.8638   | 0.08638  | 10p14    | C/T     |          |                   |
|                                                             |     |           |           |    |         |        |    |       |        |          |          |          |          |         |          |                   |
| Perseverative Behavior (Sameness)                           |     |           |           |    |         |        |    |       |        |          |          |          |          |         |          |                   |
| Q1 (N = 6)                                                  | CHR | SNP       | BP        | A1 | F_A     | F_U    | A2 | CHISQ | OR     | UNADJ    | BONF     | FDR_BH   | Band     | Alleles | Gene(s)  | Role              |
|                                                             | 10  | rs2150768 | 34098174  | C  | 0       | 0.3277 | T  | 5.841 | 0      | 0.01566  | 0.03131  | 0.03131  | 10p11.22 | C/T     |          |                   |
|                                                             |     |           |           |    |         |        |    |       |        |          |          |          |          |         |          |                   |
| Q4 (N = 5)                                                  | CHR | SNP       | BP        | A1 | F_A     | F_U    | A2 | CHISQ | OR     | UNADJ P  | BONF     | FDR_BH   | Band     | Alleles | Gene(s)  | Role              |
|                                                             | 15  | rs1051876 | 52322448  | T  | 0.6     | 0.1701 | G  | 13.01 | 7.317  | 0.00031  | 0.00062  | 0.00062  | 15q21.3  | G/T     | UNC13C   | Intron            |
|                                                             | 10  | rs2150768 | 34098174  | C  | 0.6     | 0.3277 | T  | 3.357 | 3.078  | 0.06692  | 0.1338   | 0.06692  | 10p11.22 | C/T     |          |                   |
