# Supplementary material for: ASD Phenotype—Genotype Associations in Concordant and Discordant Monozygotic and Dizygotic Twins Stratified by Severity of Autistic Traits
Source: MDPI journal article supplement (doi:10.3390/ijms20153804), 2019-08-03
Supplement: s1 [file s1]

Table S14. Demographic information of all twins from AGRE

|                   | <b>Monozygotic</b> |                                                                                         | <b>Dizygotic</b> |                                                                                                                              |
|-------------------|--------------------|-----------------------------------------------------------------------------------------|------------------|------------------------------------------------------------------------------------------------------------------------------|
| <b>Concordant</b> | Twin Pairs         | 88                                                                                      | Twin Pairs       | 56                                                                                                                           |
|                   | Age Range          | 2.99-26.26                                                                              | Age Range        | 2.74-15.72                                                                                                                   |
|                   | Average Age        | 8.96                                                                                    | Average Age      | 6.94                                                                                                                         |
|                   | # Individuals      |                                                                                         | # Individuals    |                                                                                                                              |
|                   | Female Pairs       | 12                                                                                      | Female Pairs     | 3                                                                                                                            |
|                   | Male Pairs         | 76                                                                                      | Male Pairs       | 33                                                                                                                           |
|                   | Mixed Pairs        | 0                                                                                       | Mixed Pairs      | 20                                                                                                                           |
|                   | Race (by pair)     | 3 Asian<br>8 Unknown<br>67 White<br>7 More than One race<br>3 Black or African American | Race (by pair)   | 3 Asian<br>3 Unknown<br>46 White<br>4 More than One Race<br>0 Black or African American                                      |
| <b>Discordant</b> | Twin Pairs         | 25                                                                                      | Twin Pairs       | 115                                                                                                                          |
|                   | Age Range          | NA:3.19-31.08    A:3.32-30.87                                                           | Age Range        | NA:3.16-18.49    A:3.48-18.27                                                                                                |
|                   | Average Age        | NA:11.39    A:11.33                                                                     | Average Age      | NA:9.18    A:9.20                                                                                                            |
|                   | # Individuals      |                                                                                         | # Individuals    |                                                                                                                              |
|                   | Female Pairs       | 6                                                                                       | Female Pairs     | 8                                                                                                                            |
|                   | Male Pairs         | 19                                                                                      | Male Pairs       | 42                                                                                                                           |
|                   | Mixed Pairs        | 0                                                                                       | Mixed Pairs      | 65                                                                                                                           |
|                   | Race (by pair)     | 2 Asian<br>2 Unknown<br>19 White<br>0 More than One Race<br>2 Black or African American | Race (by pair)   | 4 Asian<br>5 Unknown<br>81 White<br>18 More than One Race<br>6 Black or African American<br>1 American Indian/Alaskan Native |
