# Supplementary material for: ASD Phenotype—Genotype Associations in Concordant and Discordant Monozygotic and Dizygotic Twins Stratified by Severity of Autistic Traits
Source: MDPI journal article supplement (doi:10.3390/ijms20153804), 2019-08-03
Supplement: s1 [file s1]

| All trait QTNs for cDZ twins |               |           |          |          |            |             |             |           |
|------------------------------|---------------|-----------|----------|----------|------------|-------------|-------------|-----------|
| Language                     |               |           |          |          |            |             |             |           |
| CHR                          | SNP           | BP        | P        | Band     | Genes      | Role        | aa Position | aa Change |
|                              | 16 rs4011585  | 71914015  | 2.89E-08 | 16q22.3  |            |             |             |           |
|                              | 16 rs4888646  | 71920088  | 2.89E-08 | 16q22.3  |            |             |             |           |
|                              | 7 rs2106740   | 89092149  | 9.57E-08 | 7q21.13  |            |             |             |           |
|                              | 18 rs4891775  | 65627430  | 1.49E-06 |          |            |             |             |           |
|                              | 5 rs2578539   | 5547739   | 1.55E-06 | 5p15.32  | KIAA0947   | Downstream  | -           | -         |
|                              | 2 rs13425437  | 116550707 | 1.78E-06 | 2q14.1   |            |             |             |           |
|                              | 2 rs17543960  | 116586663 | 1.78E-06 | 2q14.1   |            |             |             |           |
|                              | 3 rs11917359  | 25673708  | 2.21E-06 | 3p24.2   | TOP2B      | Intron      | -           | -         |
|                              | 14 rs17127374 | 91017796  | 2.25E-06 | 14q32.12 | SMEK1      | Coding exon | T/T         | 264       |
|                              | 21 rs2837366  | 40301653  | 2.37E-06 | 21q22.2  | DSCAM      | Downstream  | -           | -         |
|                              | 7 rs2058002   | 25406658  | 2.74E-06 | 7p15.3   |            |             |             |           |
|                              | 5 rs2578500   | 5515148   | 3.80E-06 | 5p15.32  | KIAA0947   | Coding exon | V/I         | 901       |
|                              | 5 rs1559286   | 42787794  | 4.25E-06 | 5p12     | CCDC152    | Promoter    | -           | -         |
|                              | 13 rs1887263  | 22381716  | 4.63E-06 | 13q12.12 |            |             |             |           |
|                              | 21 rs2026886  | 45655301  | 5.05E-06 | 21q22.3  | NCRNA00175 | Downstream  | -           | -         |
|                              | 16 rs1886714  | 19970009  | 5.23E-06 | 16p12.3  | GPR139     | Intron      | -           | -         |
|                              | 11 rs184267   | 1945152   | 5.79E-06 | 11p15.5  |            |             |             |           |
|                              | 4 rs10520554  | 184446191 | 6.17E-06 | 4q35.1   | WWC2       | Intron      | -           | -         |
|                              | 2 rs2889606   | 105921422 | 6.84E-06 | 2q12.2   |            |             |             |           |
|                              | 15 rs7177755  | 60886781  | 7.51E-06 | 15q22.2  | TLN2       | Intron      | -           | -         |
|                              | 7 rs11975137  | 88988845  | 8.15E-06 | 7q21.13  |            |             |             |           |
|                              | 7 rs7794184   | 89052607  | 8.15E-06 | 7q21.13  |            |             |             |           |
|                              | 10 rs10827492 | 35469831  | 9.36E-06 | 10p11.21 | CREM       | Intron      | -           | -         |
|                              | 10 rs4934540  | 35514705  | 9.36E-06 | 10p11.21 | CREM       | Intron      | -           | -         |
|                              | 1 rs357044    | 178506096 | 9.50E-06 | 1q25.2   | LHX4       | Intron      | -           | -         |
|                              | 15 rs7162186  | 30973508  | 9.83E-06 | 15q13.3  | FMN1       | Intron      | -           | -         |
|                              |               |           |          |          |            |             |             |           |
| Nonverbal                    |               |           |          |          |            |             |             |           |
| CHR                          | SNP           | BP        | P        | Band     | Genes      | Role        | aa Position | aa Change |
|                              | 14 rs12881439 | 36175604  | 7.96E-06 | 14q13.3  |            |             |             |           |
|                              | 14 rs11848377 | 36178269  | 7.96E-06 | 14q13.3  |            |             |             |           |

|                        |            |           |          |          |               |                                |             |           |
|------------------------|------------|-----------|----------|----------|---------------|--------------------------------|-------------|-----------|
|                        |            |           |          |          |               |                                |             |           |
| Play                   |            |           |          |          |               |                                |             |           |
| CHR                    | SNP        | BP        | P        | Band     | Genes         | Role                           | aa Position | aa Change |
| 10                     | rs1171582  | 61164043  | 5.84E-07 | q21.2    | SLC16A9       | intronic                       |             |           |
| 6                      | rs4707485  | 89294410  | 1.48E-06 | q15      | LOC101928936  | non-coding                     |             |           |
| 7                      | rs1180774  | 97475759  | 1.56E-06 | q21.3    |               |                                |             |           |
| 6                      | rs2610763  | 89313184  | 2.52E-06 | q15      |               |                                |             |           |
| 2                      | rs6717613  | 299480    | 4.00E-06 | p25.3    | AC079779.5    | 5upstream/intronic/3downstream |             |           |
| 6                      | rs976145   | 81463977  | 4.71E-06 | q14.1    |               |                                |             |           |
| 8                      | rs6982697  | 29938457  | 5.68E-06 | p12      |               |                                |             |           |
| 16                     | rs8060975  | 15784912  | 6.80E-06 | p13.11   | MYH11         | intronic/5upstream/3downstream |             |           |
| 6                      | rs1407220  | 123934131 | 7.82E-06 | q22.31   | TRDN          | intronic                       |             |           |
| 6                      | rs9295192  | 162900893 | 9.11E-06 | q26      | PARK2         | intronic                       |             |           |
| 5                      | rs9329125  | 177334115 | 9.84E-06 | q35.3    | RP11-1252I4.2 | non-coding intronic            |             |           |
|                        |            |           |          |          |               |                                |             |           |
| Social                 |            |           |          |          |               |                                |             |           |
| CHR                    | SNP        | BP        | P        | Band     | Genes         | Role                           | aa Position | aa Change |
| 10                     | rs1171582  | 61164043  | 5.84E-07 | 10q21.2  | SLC16A9       | intronic                       |             |           |
| 6                      | rs4707485  | 89294410  | 1.48E-06 | 89294410 |               |                                |             |           |
| 7                      | rs1180774  | 97475759  | 1.56E-06 | 97475759 |               |                                |             |           |
| 6                      | rs2610763  | 89313184  | 2.52E-06 | 89313184 |               |                                |             |           |
| 2                      | rs6717613  | 299480    | 4.00E-06 | 2p25.3   |               |                                |             |           |
| 6                      | rs976145   | 81463977  | 4.71E-06 | 81463977 |               |                                |             |           |
| 8                      | rs6982697  | 29938457  | 5.68E-06 | 29938457 |               |                                |             |           |
| 16                     | rs8060975  | 15784912  | 6.80E-06 | 15784912 | MYH11         | intronic                       |             |           |
| 6                      | rs1407220  | 123934131 | 7.82E-06 | 1.24E+08 | TRDN          | intronic                       |             |           |
| 6                      | rs9295192  | 162900893 | 9.11E-06 | 1.63E+08 | PARK2         | intronic                       |             |           |
| 5                      | rs9329125  | 177334115 | 9.84E-06 | 1.77E+08 |               |                                |             |           |
|                        |            |           |          |          |               |                                |             |           |
| Perseverative Behavior |            |           |          |          |               |                                |             |           |
| CHR                    | SNP        | BP        | P        | Band     | Genes         | Role                           | aa Position | aa Change |
| 18                     | rs662397   | 42574834  | 7.48E-08 | 18q21.1  | ST8SIA5       | Intron                         | -           | -         |
| 11                     | rs12146477 | 102130166 | 3.01E-07 | 11q22.2  |               |                                |             |           |
| 11                     | rs2846714  | 102031820 | 3.37E-07 | 11q22.2  |               |                                |             |           |

|    |            |           |          |          |         |          |   |   |
|----|------------|-----------|----------|----------|---------|----------|---|---|
| 20 | rs6039104  | 8164697   | 7.57E-07 | 20p12.3  | PLCB1   | Intron   | - | - |
| 18 | rs9675544  | 42570717  | 1.17E-06 | 18q21.1  | ST8SIA5 | Intron   | - | - |
| 14 | rs2331779  | 68151670  | 3.11E-06 | 14q24.1  |         |          |   |   |
| 14 | rs8014901  | 68159378  | 3.37E-06 | 14q24.1  |         |          |   |   |
| 13 | rs9562157  | 113999458 | 4.17E-06 | 13q34    |         |          |   |   |
| 8  | rs4875505  | 5149306   | 5.22E-06 | 8p23.2   |         |          |   |   |
| 4  | rs12500644 | 138941802 | 5.86E-06 | 4q28.3   |         |          |   |   |
| 21 | rs7281374  | 34423844  | 7.12E-06 | 21q22.11 | MRPS6   | Intron   | - | - |
| 1  | rs7547507  | 15494295  | 8.44E-06 | 1p36.21  | FHAD1   | Intron   | - | - |
| 9  | rs1340007  | 1314127   | 8.83E-06 | 9p24.3   |         |          |   |   |
| 6  | rs1040521  | 2984608   | 9.15E-06 | 6p25.2   | FAM136B | Promoter | - | - |
| 6  | rs7774283  | 2986199   | 9.15E-06 | 6p25.2   | FAM136B | Promoter | - | - |
