# Supplementary material for: ASD Phenotype—Genotype Associations in Concordant and Discordant Monozygotic and Dizygotic Twins Stratified by Severity of Autistic Traits
Source: MDPI journal article supplement (doi:10.3390/ijms20153804), 2019-08-03
Supplement: s1 [file s1]

| All trait QTNs for dA.DZ twins |            |           |          |        |                 |                     |             |           |
|--------------------------------|------------|-----------|----------|--------|-----------------|---------------------|-------------|-----------|
| <b>Language</b>                |            |           |          |        |                 |                     |             |           |
| CHR                            | SNP        | BP        | P        | Band   | Genes           | Role                | aa Position | aa Change |
| 15                             | rs1823718  | 71934297  | 2.01E-06 | q24.1  |                 |                     |             |           |
| 1                              | rs17587765 | 117372602 | 3.53E-06 | p13.1  | CD101           | intronic            |             |           |
| 12                             | rs249047   | 112562237 | 9.96E-06 | q24.13 |                 |                     |             |           |
|                                |            |           |          |        |                 |                     |             |           |
| <b>Nonverbal</b>               |            |           |          |        |                 |                     |             |           |
| CHR                            | SNP        | BP        | P        | Band   | Genes           | Role                | aa Position | aa Change |
| 6                              | rs6923735  | 3362642   | 1.03E-06 | p25.2  | SLC22A23        | intronic            |             |           |
| 11                             | rs2953310  | 40094119  | 6.01E-06 | p12    | LRR4C           | coding              | 96          | R>R       |
| 3                              | rs7613095  | 194294915 | 7.35E-06 | q29    |                 |                     |             |           |
| 6                              | rs807302   | 119968450 | 7.68E-06 | q22.31 |                 |                     |             |           |
|                                |            |           |          |        |                 |                     |             |           |
| <b>Play</b>                    |            |           |          |        |                 |                     |             |           |
| CHR                            | SNP        | BP        | P        | Band   | Genes           | Role                | aa Position | aa Change |
| 12                             | rs17483048 | 118415784 | 8.70E-08 | q24.23 | CCDC60/AF086288 | non-coding intronic |             |           |
| 10                             | rs17692734 | 54841584  | 3.90E-07 | q21.1  |                 |                     |             |           |
| 10                             | rs2133470  | 54807327  | 3.48E-06 | q21.1  |                 |                     |             |           |
| 3                              | rs1563981  | 28722162  | 6.95E-06 | p24.1  | LINC00693       | non-coding intronic |             |           |
| 16                             | rs17772954 | 76243191  | 9.87E-06 | q23.1  |                 |                     |             |           |
|                                |            |           |          |        |                 |                     |             |           |
| <b>Social</b>                  |            |           |          |        |                 |                     |             |           |
| CHR                            | SNP        | BP        | P        | Band   | Genes           | Role                | aa Position | aa Change |
| 11                             | rs2953310  | 40094119  | 1.37E-06 | p12    | LRR4C           | coding              | 96/100      | R>R       |
| 14                             | rs12894797 | 79861843  | 7.21E-06 | q31.1  | DIO2-AS1        |                     |             |           |
|                                |            |           |          |        |                 |                     |             |           |
|                                |            |           |          |        |                 |                     |             |           |
| <b>Perseverative Behaviors</b> |            |           |          |        |                 |                     |             |           |
| CHR                            | SNP        | BP        | P        | Band   | Genes           | Role                | aa Position | aa Change |
| 11                             | rs11219808 | 124225108 | 3.98E-07 | q24.2  |                 |                     |             |           |

|    |            |           |          |        |         |                              |  |  |
|----|------------|-----------|----------|--------|---------|------------------------------|--|--|
| 10 | rs11818084 | 125976888 | 1.50E-06 | q26.13 |         |                              |  |  |
| 17 | rs1010045  | 67801683  | 2.37E-06 | q24.3  |         |                              |  |  |
| 18 | rs8084650  | 36009793  | 3.90E-06 | q12.3  |         |                              |  |  |
| 6  | rs6454752  | 90075080  | 4.82E-06 | q15    | GABRR2  | intronic                     |  |  |
| 10 | rs12570126 | 75086795  | 5.25E-06 | q22.2  | SYNPO2L | 5upstream/noncoding intronic |  |  |
| 3  | rs2679593  | 157706326 | 5.90E-06 | q25.31 | KCNAB1  | intronic                     |  |  |
