# Supplementary material for: ASD Phenotype—Genotype Associations in Concordant and Discordant Monozygotic and Dizygotic Twins Stratified by Severity of Autistic Traits
Source: MDPI journal article supplement (doi:10.3390/ijms20153804), 2019-08-03
Supplement: s1 [file s1]

| Summary of case-control by quartile analysis of cDZ twins |           |            |           |       |       |       |       |       |          |          |          |          |              |           |           |                             |
|-----------------------------------------------------------|-----------|------------|-----------|-------|-------|-------|-------|-------|----------|----------|----------|----------|--------------|-----------|-----------|-----------------------------|
| Language                                                  | CHR       | SNP        | BP        | A1    | F_A   | F_U   | A2    | CHISQ | OR       | UNADJ P  | BONF     | FDR_BH   | Band         | Allele(s) | Gene      | Location                    |
| Q1 (N = 9)                                                | 14        | rs17127374 | 91017796  | C     | 0.500 | 0.083 | T     | 40.36 | 11.06    | 2.11E-10 | 5.49E-09 | 5.49E-09 | 14q32.12     | C/T       | SMEK1     | Coding exon                 |
|                                                           | 5         | rs1559286  | 42787794  | G     | 0.389 | 0.054 | T     | 38.52 | 11.14    | 5.42E-10 | 1.41E-08 | 7.04E-09 | 5p12         | G/T       | CCDC152   | Promoter                    |
|                                                           | 2         | rs17543960 | 116586663 | G     | 0.444 | 0.071 | T     | 37.04 | 10.42    | 1.16E-09 | 3.00E-08 | 1.00E-08 | 2q14.1       | G/T       |           |                             |
|                                                           | 2         | rs13425437 | 116550707 | G     | 0.444 | 0.092 | T     | 26.47 | 7.927    | 2.68E-07 | 6.97E-06 | 1.74E-06 | 2q14.1       | G/T       |           |                             |
|                                                           | 21        | rs2837366  | 40301653  | T     | 0.500 | 0.169 | C     | 13.91 | 4.917    | 1.92E-04 | 4.98E-03 | 9.97E-04 | 21q22.2      | C/T       | DSCAM     | Downstream                  |
|                                                           | 4         | rs10520554 | 184446191 | C     | 0.833 | 0.415 | T     | 12.95 | 7.063    | 3.20E-04 | 8.32E-03 | 1.39E-03 | 4q35.1       | C/T       | WWC2      | Intron                      |
|                                                           | 3         | rs11917359 | 25673708  | A     | 0.333 | 0.093 | G     | 12.23 | 4.889    | 4.71E-04 | 1.23E-02 | 1.75E-03 | 3p24.2       | A/G       | TOP2B     | Intron                      |
|                                                           | 13        | rs1887263  | 22381716  | A     | 0.500 | 0.187 | G     | 11.56 | 4.362    | 6.73E-04 | 1.75E-02 | 2.19E-03 | 13q12.12     | A/G       |           |                             |
|                                                           | 10        | rs10827492 | 35469831  | T     | 0.000 | 0.361 | C     | 10.15 | 0        | 1.44E-03 | 3.75E-02 | 3.84E-03 | 10p11.21     | C/T       | CREM      | Intron                      |
|                                                           | 10        | rs4934540  | 35514705  | C     | 0.000 | 0.360 | T     | 10.11 | 0        | 1.48E-03 | 3.84E-02 | 3.84E-03 | 10p11.21     | C/T       | CREM      | Intron                      |
|                                                           | 15        | rs7177755  | 60886781  | C     | 0.611 | 0.278 | T     | 9.852 | 4.072    | 1.70E-03 | 4.41E-02 | 4.01E-03 | 15q22.2      | C/T       | TLN2      | Intron                      |
|                                                           | 16        | rs4011585  | 71914015  | A     | 0.111 | 0.472 | C     | 9.391 | 0.1397   | 2.18E-03 | 5.67E-02 | 4.73E-03 | 16q22.3      | A/C       |           |                             |
|                                                           | 16        | rs4888646  | 71920088  | A     | 0.111 | 0.457 | G     | 8.636 | 0.1487   | 3.30E-03 | 8.57E-02 | 6.59E-03 | 16q22.3      | A/G       |           |                             |
|                                                           | 7         | rs2106740  | 89092149  | T     | 0.375 | 0.133 | C     | 8.093 | 3.922    | 4.45E-03 | 1.16E-01 | 8.26E-03 | 7q21.13      | C/T       |           |                             |
|                                                           | 7         | rs2058002  | 25406658  | C     | 0.333 | 0.122 | T     | 7.397 | 3.587    | 6.54E-03 | 1.70E-01 | 1.12E-02 | 7p15.3       | C/T       |           |                             |
|                                                           | 21        | rs2026886  | 45655301  | C     | 0.111 | 0.424 | A     | 7.191 | 0.1699   | 7.33E-03 | 1.91E-01 | 1.12E-02 | 21q22.3      | A/C       | NCRNA001  | Downstream                  |
|                                                           | 16        | rs1886714  | 19970009  | C     | 0.667 | 0.363 | T     | 7.16  | 3.514    | 7.46E-03 | 1.94E-01 | 1.12E-02 | 16p12.3      | C/T       | GPR139    | Intron                      |
|                                                           | 18        | rs4891775  | 65627430  | C     | 0.625 | 0.315 | T     | 7.081 | 3.623    | 7.79E-03 | 2.03E-01 | 1.12E-02 |              |           |           |                             |
|                                                           | 2         | rs2889606  | 105921422 | G     | 0.056 | 0.354 | A     | 6.992 | 0.1074   | 8.19E-03 | 2.13E-01 | 1.12E-02 | 2q12.2       | A/G       |           |                             |
|                                                           | 5         | rs2578500  | 5515148   | G     | 0.056 | 0.322 | A     | 5.836 | 0.1239   | 1.57E-02 | 4.08E-01 | 2.04E-02 | 5p15.32      | A/G       | KIAA0947  | Coding exon                 |
|                                                           | 7         | rs11975137 | 88988845  | G     | 0.333 | 0.138 | A     | 5.689 | 3.113    | 1.71E-02 | 4.44E-01 | 2.11E-02 | 7q21.13      | A/G       |           |                             |
|                                                           | 7         | rs7794184  | 89052607  | C     | 0.333 | 0.145 | T     | 5.106 | 2.947    | 2.38E-02 | 6.20E-01 | 2.82E-02 | 7q21.13      | C/T       |           |                             |
|                                                           | 5         | rs2578539  | 5547739   | C     | 0.063 | 0.325 | A     | 5.009 | 0.1386   | 2.52E-02 | 6.56E-01 | 2.85E-02 | 5p15.32      | A/C       | KIAA0947  | Downstream                  |
| 15                                                        | rs7162186 | 30973508   | T         | 0.389 | 0.196 | C     | 4.231 | 2.613 | 3.97E-02 | 1.00E+00 | 4.30E-02 | 15q13.3  | C/T          | FMN1      | Intron    |                             |
| Q4 (N = 28)                                               | CHR       | SNP        | BP        | A1    | F_A   | F_U   | A2    | CHISQ | OR       | UNADJ P  | BONF     | FDR_BH   | Band         | Allele(s) | Gene      | Location                    |
|                                                           | 11        | rs184267   | 1945152   | A     | 0.089 | 0.378 | G     | 19.69 | 0.1614   | 9.12E-06 | 2.37E-04 | 2.37E-04 | 11p15.5      | A/G       |           |                             |
|                                                           | 5         | rs2578539  | 5547739   | C     | 0.589 | 0.325 | A     | 17.57 | 2.983    | 2.77E-05 | 7.19E-04 | 3.40E-04 | 5p15.32      | A/C       | KIAA0947  | Downstream                  |
|                                                           | 16        | rs4888646  | 71920088  | A     | 0.732 | 0.457 | G     | 16.91 | 3.252    | 3.92E-05 | 1.02E-03 | 3.40E-04 | 16q22.3      | A/G       |           |                             |
|                                                           | 1         | rs357044   | 178506096 | G     | 0.268 | 0.105 | A     | 15.28 | 3.107    | 9.27E-05 | 2.41E-03 | 5.63E-04 | 1q25.2       | A/G       | LHX4      | Intron                      |
|                                                           | 16        | rs4011585  | 71914015  | A     | 0.732 | 0.472 | C     | 14.99 | 3.054    | 1.08E-04 | 2.81E-03 | 5.63E-04 | 16q22.3      | A/C       |           |                             |
|                                                           | 16        | rs1886714  | 19970009  | C     | 0.143 | 0.363 | T     | 11.61 | 0.2929   | 6.56E-04 | 1.71E-02 | 2.62E-03 | 16p12.3      | C/T       | GPR139    | Intron                      |
|                                                           | 18        | rs4891775  | 65627430  | C     | 0.096 | 0.315 | T     | 11.47 | 0.2312   | 7.09E-04 | 1.84E-02 | 2.62E-03 | NA           |           |           |                             |
|                                                           | 15        | rs7162186  | 30973508  | T     | 0.018 | 0.196 | C     | 11.23 | 0.0747   | 8.07E-04 | 2.10E-02 | 2.62E-03 | 15q13.3      | C/T       | FMN1      | Intron                      |
|                                                           | 4         | rs10520554 | 184446191 | C     | 0.196 | 0.415 | T     | 10.87 | 0.3453   | 9.80E-04 | 2.55E-02 | 2.83E-03 | 4q35.1       | C/T       | WWC2      | Intron                      |
|                                                           | 21        | rs2837366  | 40301653  | T     | 0.018 | 0.169 | C     | 9.079 | 0.0894   | 2.59E-03 | 6.72E-02 | 6.72E-03 | 21q22.2      | C/T       | DSCAM     | Downstream                  |
|                                                           | 7         | rs2058002  | 25406658  | C     | 0.000 | 0.122 | T     | 7.793 | 0        | 5.25E-03 | 1.36E-01 | 1.24E-02 | 7p15.3       | C/T       |           |                             |
|                                                           | 5         | rs2578500  | 5515148   | G     | 0.482 | 0.322 | A     | 6.499 | 1.962    | 1.08E-02 | 2.81E-01 | 2.17E-02 | 5p15.32      | A/G       | KIAA0947  | Coding exon                 |
|                                                           | 13        | rs1887263  | 22381716  | A     | 0.054 | 0.187 | G     | 6.488 | 0.2469   | 1.09E-02 | 2.82E-01 | 2.17E-02 | 13q12.12     | A/G       |           |                             |
|                                                           | 7         | rs2106740  | 89092149  | T     | 0.019 | 0.133 | C     | 6.096 | 0.1233   | 1.36E-02 | 3.52E-01 | 2.52E-02 | 7q21.13      | C/T       |           |                             |
|                                                           | 3         | rs11917359 | 25673708  | A     | 0.000 | 0.093 | G     | 5.72  | 0        | 1.68E-02 | 4.36E-01 | 2.84E-02 | 3p24.2       | A/G       | TOP2B     | Intron                      |
|                                                           | 2         | rs13425437 | 116550707 | G     | 0.000 | 0.092 | T     | 5.645 | 0        | 1.75E-02 | 4.55E-01 | 2.84E-02 | 2q14.1       | G/T       |           |                             |
|                                                           | 15        | rs7177755  | 60886781  | C     | 0.143 | 0.278 | T     | 5.083 | 0.4319   | 2.42E-02 | 6.28E-01 | 3.70E-02 | 15q22.2      | C/T       | TLN2      | Intron                      |
|                                                           | 2         | rs17543960 | 116586663 | G     | 0.000 | 0.071 | T     | 4.296 | 0        | 3.82E-02 | 9.93E-01 | 5.52E-02 | 2q14.1       | G/T       |           |                             |
|                                                           | 2         | rs2889606  | 105921422 | G     | 0.482 | 0.354 | A     | 3.972 | 1.699    | 4.63E-02 | 1.00E+00 | 6.33E-02 | 2q12.2       | A/G       |           |                             |
|                                                           | 7         | rs7794184  | 89052607  | C     | 0.054 | 0.145 | T     | 3.759 | 0.3336   | 5.25E-02 | 1.00E+00 | 6.83E-02 | 7q21.13      | C/T       |           |                             |
|                                                           | 7         | rs11975137 | 88988845  | G     | 0.054 | 0.138 | A     | 3.361 | 0.3524   | 6.68E-02 | 1.00E+00 | 8.27E-02 | 7q21.13      | A/G       |           |                             |
|                                                           | 5         | rs1559286  | 42787794  | G     | 0.000 | 0.054 | T     | 3.196 | 0        | 7.38E-02 | 1.00E+00 | 8.73E-02 | 5p12         | G/T       | CCDC152   | Promoter                    |
| Nonverbal                                                 |           |            |           |       |       |       |       |       |          |          |          |          |              |           |           |                             |
| Q1 (N = 17)                                               | CHR       | SNP        | BP        | A1    | F_A   | F_U   | A2    | CHISQ | OR       | UNADJ P  | BONF     | FDR_BH   | Band         | Alleles   | Gene(s)   | Role                        |
| Nonverb.Q1                                                | 14        | rs11848377 | 36178269  | C     | 0.059 | 0.204 | T     | 4.387 | 0.2443   | 3.62E-02 | 7.24E-02 | 4.26E-02 | 14q13.3      | C/T       |           |                             |
|                                                           | 14        | rs12881439 | 36175604  | G     | 0.059 | 0.198 | A     | 4.11  | 0.254    | 4.26E-02 | 8.53E-02 | 4.26E-02 | 14q13.3      | A/G       |           |                             |
| Q4 (N = 11)                                               |           |            |           |       |       |       |       |       |          |          |          |          |              |           |           |                             |
| Nonverb.Q4                                                | CHR       | SNP        | BP        | A1    | F_A   | F_U   | A2    | CHISQ | OR       | UNADJ P  | BONF     | FDR_BH   | Band         | Alleles   | Gene(s)   | Role                        |
|                                                           | 14        | rs12881439 | 36175604  | G     | 0.500 | 0.198 | A     | 12.59 | 4.064    | 3.89E-04 | 7.78E-04 | 5.95E-04 | 14q13.3      | A/G       |           |                             |
|                                                           | 14        | rs11848377 | 36178269  | C     | 0.500 | 0.204 | T     | 11.79 | 3.908    | 5.95E-04 | 1.19E-03 | 5.95E-04 | 14q13.3      | C/T       |           |                             |
| Play                                                      |           |            |           |       |       |       |       |       |          |          |          |          |              |           |           |                             |
| Q1 (N = 13)                                               | CHR       | SNP        | BP        | A1    | F_A   | F_U   | A2    | CHISQ | OR       | UNADJ P  | BONF     | FDR_BH   | Band         | Alleles   | Gene(s)   | Role                        |
| Play.Q1                                                   | 7         | rs1180774  | 97475759  | A     | 0.615 | 0.268 | G     | 15.88 | 4.378    | 6.73E-05 | 7.41E-04 | 7.41E-04 | 7q21.3       | A/G       |           |                             |
|                                                           | 6         | rs9295192  | 162900893 | T     | 0.000 | 0.339 | G     | 12.27 | 0        | 4.59E-04 | 5.05E-03 | 2.53E-03 | 6q25.2-q27.1 | G/T       | PARK2     | intron                      |
|                                                           | 6         | rs1407220  | 123934131 | G     | 0.423 | 0.185 | A     | 9.72  | 3.239    | 1.82E-03 | 2.01E-02 | 6.68E-03 | 6q22.31      | A/G       | TRDN      | intron                      |
|                                                           | 6         | rs976145   | 81463977  | T     | 0.385 | 0.167 | C     | 8.746 | 3.116    | 3.10E-03 | 3.41E-02 | 7.18E-03 | 6q14.1       | C/T       |           |                             |
|                                                           | 5         | rs9329125  | 177334115 | A     | 0.385 | 0.168 | G     | 8.655 | 3.099    | 3.26E-03 | 3.59E-02 | 7.18E-03 | 5q35.3       | A G       | RP11-1252 | intron                      |
|                                                           | 6         | rs4707485  | 89294410  | C     | 0.038 | 0.277 | T     | 7.356 | 0.1045   | 6.68E-03 | 7.35E-02 | 1.23E-02 | 6q15         | C/T       | LOC101921 | non-coding                  |
|                                                           | 16        | rs8060975  | 15784912  | T     | 0.385 | 0.222 | C     | 3.969 | 2.194    | 4.64E-02 | 5.10E-01 | 7.29E-02 | 16p13.11     | C/T       | MYH11     | intron5upstream/3downstream |
|                                                           | 6         | rs2610763  | 89313184  | C     | 0.038 | 0.177 | T     | 3.433 | 0.1855   | 6.39E-02 | 7.03E    |          |              |           |           |                             |

|    |           |           |   |       |       |   |       |        |          |          |          |            |     |           |        |  |
|----|-----------|-----------|---|-------|-------|---|-------|--------|----------|----------|----------|------------|-----|-----------|--------|--|
| 8  | rs6982697 | 29938457  | A | 0.267 | 0.076 | G | 15.11 | 4.401  | 1.01E-04 | 1.11E-03 | 3.72E-04 | 8p12       |     |           |        |  |
| 6  | rs2610763 | 89313184  | C | 0.433 | 0.177 | T | 13.29 | 3.546  | 2.67E-04 | 2.94E-03 | 7.34E-04 | 6q15       | C/T |           |        |  |
| 6  | rs4707485 | 89294410  | C | 0.500 | 0.277 | T | 7.404 | 2.614  | 6.51E-03 | 7.16E-02 | 1.43E-02 | 6q15       | C/T |           |        |  |
| 6  | rs1407220 | 123934131 | G | 0.000 | 0.185 | A | 6.782 | 0      | 9.21E-03 | 1.01E-01 | 1.69E-02 | 6q22.31    | A/G | TRDN      | intron |  |
| 7  | rs1180774 | 97475759  | A | 0.067 | 0.268 | G | 6.163 | 0.1954 | 1.31E-02 | 1.44E-01 | 1.74E-02 | 7q21.3     | A/G |           |        |  |
| 5  | rs9329125 | 177334115 | A | 0.000 | 0.168 | G | 6.043 | 0      | 1.40E-02 | 1.54E-01 | 1.74E-02 | 5q35.3     | A G | RP11-1252 | intron |  |
| 6  | rs976145  | 81463977  | T | 0.000 | 0.167 | C | 6.01  | 0      | 1.42E-02 | 1.56E-01 | 1.74E-02 | 6q14.1     | C/T |           |        |  |
| 16 | rs8060975 | 15784912  | T | 0.067 | 0.222 | C | 4.165 | 0.2508 | 4.13E-02 | 4.54E-01 | 4.54E-02 | 16p13.11   | C/T | MYH11     | intron |  |
| 6  | rs9295192 | 162900893 | T | 0.500 | 0.339 | G | 2.99  | 1.95   | 8.38E-02 | 9.21E-01 | 8.38E-02 | 6q25.2-q27 | G/T | PARK2     | intron |  |

Social

| Q1 (N = 18) | CHR | SNP       | BP       | A1 | F_A   | F_U   | A2 | CHISQ | OR     | UNADJ P  | BONF     | FDR_BH   | Band     | Alleles | Gene(s) | Role   |
|-------------|-----|-----------|----------|----|-------|-------|----|-------|--------|----------|----------|----------|----------|---------|---------|--------|
|             | 15  | rs4551980 | 47910160 | T  | 0.028 | 0.320 | C  | 14.09 | 0.0607 | 1.74E-04 | 1.22E-03 | 6.22E-04 | 15q21.2  | C/T     |         |        |
|             | 15  | rs7182178 | 47911691 | T  | 0.028 | 0.320 | C  | 14.05 | 0.0608 | 1.78E-04 | 1.24E-03 | 6.22E-04 | 15q21.2  | C/T     |         |        |
|             | 18  | rs6506251 | 4787073  | G  | 0.639 | 0.378 | A  | 10.35 | 2.915  | 1.30E-03 | 9.06E-03 | 3.02E-03 | 18p11.31 | A/G     |         |        |
|             | 2   | rs6717613 | 299480   | A  | 0.167 | 0.357 | G  | 5.642 | 0.3605 | 1.75E-02 | 1.23E-01 | 3.07E-02 | 2p25.3   | A/G     |         |        |
|             | 17  | rs2916154 | 62923036 | G  | 0.471 | 0.296 | A  | 4.924 | 2.114  | 2.65E-02 | 1.85E-01 | 3.30E-02 | 17q24.2  | A/G     | PITPNC1 | Intron |
|             | 10  | rs1171582 | 61164043 | T  | 0.250 | 0.432 | C  | 4.813 | 0.4388 | 2.83E-02 | 1.98E-01 | 3.30E-02 | 10q21.2  | C/T     |         |        |

| Q4 (N = 11) | CHR | SNP       | BP       | A1 | F_A   | F_U   | A2 | CHISQ | OR     | UNADJ P  | BONF     | FDR_BH   | Band     | Alleles | Gene(s) | Role   |
|-------------|-----|-----------|----------|----|-------|-------|----|-------|--------|----------|----------|----------|----------|---------|---------|--------|
| Social.Q4   | 18  | rs352135  | 48086130 | G  | 0.636 | 0.211 | A  | 23.67 | 6.548  | 1.14E-06 | 8.01E-06 | 8.01E-06 | 18q21.2  | A/G     |         |        |
|             | 2   | rs6717613 | 299480   | A  | 0.818 | 0.357 | G  | 20.26 | 8.11   | 6.77E-06 | 4.74E-05 | 2.37E-05 | 2p25.3   | A/G     |         |        |
|             | 10  | rs1171582 | 61164043 | T  | 0.818 | 0.432 | C  | 13.32 | 5.924  | 2.63E-04 | 1.84E-03 | 6.12E-04 | 10q21.2  | C/T     |         |        |
|             | 18  | rs6506251 | 4787073  | G  | 0.045 | 0.378 | A  | 10.3  | 0.0785 | 1.33E-03 | 9.30E-03 | 2.32E-03 | 18p11.31 | A/G     |         |        |
|             | 17  | rs2916154 | 62923036 | G  | 0.000 | 0.296 | A  | 9.231 | 0      | 2.38E-03 | 1.67E-02 | 3.33E-03 | 17q24.2  | A/G     | PITPNC1 | Intron |
|             | 15  | rs7182178 | 47911691 | T  | 0.591 | 0.320 | C  | 7.39  | 3.073  | 6.56E-03 | 4.59E-02 | 6.67E-03 | 15q21.2  | C/T     |         |        |
|             | 15  | rs4551980 | 47910160 | T  | 0.591 | 0.320 | C  | 7.359 | 3.067  | 6.67E-03 | 4.67E-02 | 6.67E-03 | 15q21.2  | C/T     |         |        |

Perseverative Behavior (Sameness)

| Q1 (N = 19) | CHR | SNP        | BP        | A1 | F_A   | F_U   | A2 | CHISQ | OR     | UNADJ P  | BONF     | FDR_BH   | Band    | Alleles | Gene(s) | Role     |
|-------------|-----|------------|-----------|----|-------|-------|----|-------|--------|----------|----------|----------|---------|---------|---------|----------|
|             | 1   | rs7547507  | 15494295  | T  | 0.632 | 0.363 | G  | 11.78 | 3.015  | 5.98E-04 | 8.97E-03 | 8.50E-03 | 1p36.21 | G/T     | FHAD1   | Intron   |
|             | 18  | rs662397   | 42574834  | G  | 0.026 | 0.258 | T  | 10.6  | 0.0779 | 1.13E-03 | 1.70E-02 | 8.50E-03 | 18q21.1 | G/T     | ST8SIA5 | Intron   |
|             | 18  | rs9675544  | 42570717  | A  | 0.026 | 0.204 | G  | 7.348 | 0.1057 | 6.71E-03 | 1.01E-01 | 3.36E-02 | 18q21.1 | A/G     | ST8SIA5 | Intron   |
|             | 14  | rs8014901  | 68159378  | C  | 0.053 | 0.212 | T  | 5.776 | 0.2061 | 1.63E-02 | 2.44E-01 | 4.14E-02 | 14q24.1 | C/T     |         |          |
|             | 14  | rs2331779  | 68151670  | T  | 0.026 | 0.173 | G  | 5.687 | 0.1294 | 1.71E-02 | 2.56E-01 | 4.14E-02 | 14q24.1 | G/T     |         |          |
|             | 6   | rs1040521  | 2984608   | A  | 0.263 | 0.453 | G  | 5.496 | 0.431  | 1.91E-02 | 2.86E-01 | 4.14E-02 | 6p25.2  | A/G     | FAM136B | Promoter |
|             | 20  | rs6039104  | 8164697   | A  | 0.026 | 0.169 | G  | 5.475 | 0.1333 | 1.93E-02 | 2.89E-01 | 4.14E-02 | 20p12.3 | A/G     | PLCB1   | Intron   |
|             | 11  | rs12146477 | 102130166 | G  | 0.105 | 0.268 | A  | 5.082 | 0.3221 | 2.42E-02 | 3.63E-01 | 4.53E-02 | 11q22.2 | A/G     |         |          |
|             | 6   | rs7774283  | 2986199   | C  | 0.263 | 0.441 | T  | 4.858 | 0.4521 | 2.75E-02 | 4.13E-01 | 4.59E-02 | 6p25.2  | C/T     | FAM136B | Promoter |
|             | 13  | rs9562157  | 113999458 | A  | 0.184 | 0.351 | G  | 4.595 | 0.4182 | 3.21E-02 | 4.81E-01 | 4.81E-02 | 13q34   | A/G     |         |          |
|             | 8   | rs4875505  | 5149306   | T  | 0.316 | 0.474 | C  | 3.774 | 0.5127 | 5.21E-02 | 7.81E-01 | 7.10E-02 | 8p23.2  | C/T     |         |          |
|             | 11  | rs2846714  | 102031820 | G  | 0.105 | 0.234 | T  | 3.504 | 0.3847 | 6.12E-02 | 9.18E-01 | 7.52E-02 | 11q22.2 | G/T     |         |          |
|             | 4   | rs12500644 | 138941802 | T  | 0.211 | 0.354 | C  | 3.402 | 0.4865 | 6.51E-02 | 9.77E-01 | 7.52E-02 | 4q28.3  | C/T     |         |          |

| Q4 (N = 14) | CHR | SNP        | BP        | A1 | F_A   | F_U   | A2 | CHISQ | OR     | UNADJ P  | BONF     | FDR_BH   | Band     | Alleles | Gene(s) | Role     |
|-------------|-----|------------|-----------|----|-------|-------|----|-------|--------|----------|----------|----------|----------|---------|---------|----------|
|             | 11  | rs2846714  | 102031820 | G  | 0.654 | 0.234 | T  | 25.23 | 6.177  | 5.09E-07 | 7.63E-06 | 7.63E-06 | 11q22.2  | G/T     |         |          |
|             | 4   | rs12500644 | 138941802 | T  | 0.714 | 0.354 | C  | 15.75 | 4.561  | 7.21E-05 | 1.08E-03 | 3.72E-04 | 4q28.3   | C/T     |         |          |
|             | 21  | rs7281374  | 34423844  | G  | 0.308 | 0.087 | A  | 15.7  | 4.67   | 7.44E-05 | 1.12E-03 | 3.72E-04 | 21q22.11 | A/G     | MRPS6   | Intron   |
|             | 13  | rs9562157  | 113999458 | A  | 0.679 | 0.351 | G  | 13.12 | 3.91   | 2.93E-04 | 4.39E-03 | 1.10E-03 | 13q34    | A/G     |         |          |
|             | 14  | rs2331779  | 68151670  | T  | 0.429 | 0.173 | G  | 12.66 | 3.591  | 3.73E-04 | 5.59E-03 | 1.12E-03 | 14q24.1  | G/T     |         |          |
|             | 14  | rs8014901  | 68159378  | C  | 0.464 | 0.212 | T  | 10.51 | 3.215  | 1.19E-03 | 1.78E-02 | 2.66E-03 | 14q24.1  | C/T     |         |          |
|             | 9   | rs1340007  | 1314127   | G  | 0.654 | 0.353 | A  | 10.27 | 3.47   | 1.35E-03 | 2.03E-02 | 2.66E-03 | 9p24.3   | A/G     |         |          |
|             | 11  | rs12146477 | 102130166 | G  | 0.536 | 0.268 | A  | 10.18 | 3.159  | 1.42E-03 | 2.13E-02 | 2.66E-03 | 11q22.2  | A/G     |         |          |
|             | 20  | rs6039104  | 8164697   | A  | 0.393 | 0.169 | G  | 9.925 | 3.191  | 1.63E-03 | 2.45E-02 | 2.72E-03 | 20p12.3  | A/G     | PLCB1   | Intron   |
|             | 8   | rs4875505  | 5149306   | T  | 0.750 | 0.474 | C  | 8.521 | 3.333  | 3.51E-03 | 5.27E-02 | 5.27E-03 | 8p23.2   | C/T     |         |          |
|             | 6   | rs7774283  | 2986199   | C  | 0.679 | 0.441 | T  | 6.351 | 2.672  | 1.17E-02 | 1.76E-01 | 1.60E-02 | 6p25.2   | C/T     | FAM136B | Promoter |
|             | 18  | rs9675544  | 42570717  | A  | 0.393 | 0.204 | G  | 6.121 | 2.53   | 1.34E-02 | 2.00E-01 | 1.67E-02 | 18q21.1  | A/G     | ST8SIA5 | Intron   |
|             | 6   | rs1040521  | 2984608   | A  | 0.679 | 0.453 | G  | 5.705 | 2.547  | 1.69E-02 | 2.54E-01 | 1.92E-02 | 6p25.2   | A/G     | FAM136B | Promoter |
|             | 18  | rs662397   | 42574834  | G  | 0.462 | 0.258 | T  | 5.608 | 2.47   | 1.79E-02 | 2.68E-01 | 1.92E-02 | 18q21.1  | G/T     | ST8SIA5 | Intron   |
|             | 1   | rs7547507  | 15494295  | T  | 0.179 | 0.363 | G  | 4.081 | 0.3823 | 4.34E-02 | 6.50E-01 | 4.34E-02 | 1p36.21  | G/T     | FHAD1   | Intron   |
