# Supplementary material for: ASD Phenotype—Genotype Associations in Concordant and Discordant Monozygotic and Dizygotic Twins Stratified by Severity of Autistic Traits
Source: MDPI journal article supplement (doi:10.3390/ijms20153804), 2019-08-03
Supplement: s1 [file s1]

| Case-control analysis using dA.DZ as cases and dNA.DZ as controls |            |           |        |    |        |        |    |       |          |       |                    |                     |
|-------------------------------------------------------------------|------------|-----------|--------|----|--------|--------|----|-------|----------|-------|--------------------|---------------------|
| CHR                                                               | SNP        | BP        | Band   | A1 | F_A    | F_U    | A2 | CHISQ | P        | OR    | Symbol             | Role                |
| 14                                                                | rs12883250 | 87516629  | q31.3  | A  | 0.5395 | 0.2778 | C  | 10.45 | 1.23E-03 | 3.046 | GALC               | intronic            |
| 1                                                                 | rs2480767  | 181523841 | q25.3  | T  | 0.3816 | 0.1528 | C  | 9.814 | 1.73E-03 | 3.422 | NMNAT2             | intronic            |
| 1                                                                 | rs4652795  | 181532805 | q25.3  | C  | 0.4474 | 0.2083 | T  | 9.539 | 2.01E-03 | 3.076 | NMNAT2             | intronic            |
| 1                                                                 | rs2494462  | 180534188 | q25.3  | C  | 0.3553 | 0.1389 | T  | 9.232 | 2.38E-03 | 3.416 | GS1_122H1.2        | non-coding intronic |
| 1                                                                 | rs2494465  | 180531396 | q25.3  | G  | 0.3553 | 0.1389 | A  | 9.232 | 2.38E-03 | 3.416 | GS1_122H1.2        | non-coding intronic |
| 1                                                                 | rs2985431  | 180536324 | q25.3  | C  | 0.3553 | 0.1389 | A  | 9.232 | 2.38E-03 | 3.416 | GS1_122H1.2        | non-coding intronic |
| 1                                                                 | rs3001275  | 180535260 | q25.3  | T  | 0.3553 | 0.1389 | C  | 9.232 | 2.38E-03 | 3.416 | GS1_122H1.2        | non-coding intronic |
| 14                                                                | rs17124022 | 87601279  | q31.3  | C  | 0.4079 | 0.1806 | T  | 9.147 | 2.49E-03 | 3.126 | LOC283587          | non-coding intronic |
| 10                                                                | rs17415112 | 99194781  | q24.1  | A  | 0.1974 | 0.0417 | G  | 8.39  | 3.77E-03 | 5.656 | EXOSC1/ZDDGGC16    | intronic/5UPSTREAM  |
| 1                                                                 | rs2477185  | 180533140 | q25.3  | A  | 0.3429 | 0.1389 | C  | 8.109 | 4.41E-03 | 3.235 | GS1_122H1.2        | non-coding intronic |
| 5                                                                 | rs2887029  | 39470981  | p13.1  | C  | 0.3378 | 0.1389 | T  | 7.925 | 4.88E-03 | 3.163 |                    |                     |
| 3                                                                 | rs4401377  | 20621490  | p24.3  | A  | 0.2368 | 0.0694 | G  | 7.893 | 4.96E-03 | 4.159 |                    |                     |
| 22                                                                | rs4822872  | 26109272  | q12.1  | G  | 0.3158 | 0.1250 | T  | 7.768 | 5.32E-03 | 3.231 |                    |                     |
| 5                                                                 | rs13184924 | 108130246 | q21.3  | G  | 0.2143 | 0.0556 | A  | 7.716 | 5.47E-03 | 4.636 | FER                | intronic            |
| 2                                                                 | rs6706314  | 82740073  | p12    | T  | 0.1351 | 0.0139 | C  | 7.701 | 5.52E-03 | 11.09 |                    |                     |
| 5                                                                 | rs13169624 | 108099815 | q21.3  | T  | 0.2105 | 0.0556 | G  | 7.597 | 5.85E-03 | 4.533 |                    |                     |
| 23                                                                | rs2748316  | 32684964  | p21.1  | A  | 0.4222 | 0.1698 | G  | 7.598 | 5.85E-03 | 3.573 | DMD                | intronic            |
| 2                                                                 | rs13432506 | 47078591  | p21    | A  | 0.1579 | 0.0278 | C  | 7.309 | 6.86E-03 | 6.562 | TTC7A              | intronic            |
| 14                                                                | rs7159781  | 98087040  | q32.2  | A  | 0.1579 | 0.0278 | C  | 7.309 | 6.86E-03 | 6.562 |                    |                     |
| 5                                                                 | rs2398721  | 143568607 | q31.3  | T  | 0.2237 | 0.0694 | C  | 6.95  | 8.38E-03 | 3.861 | KCTD16             | intronic            |
| 3                                                                 | rs6774516  | 5277341   | p26.1  | G  | 0.3026 | 0.1250 | T  | 6.884 | 8.70E-03 | 3.038 |                    |                     |
| 14                                                                | rs7153606  | 90380798  | q32.11 | T  | 0.3026 | 0.1250 | C  | 6.884 | 8.70E-03 | 3.038 |                    |                     |
| 2                                                                 | rs2160337  | 36818255  | p22.2  | C  | 0.2632 | 0.0972 | A  | 6.826 | 8.99E-03 | 3.316 | VIT                | intronic            |
| 5                                                                 | rs7728260  | 174361691 | q35.2  | C  | 0.2632 | 0.0972 | T  | 6.826 | 8.99E-03 | 3.316 |                    |                     |
| 5                                                                 | rs10050395 | 64203306  | q12.3  | T  | 0.1974 | 0.0556 | C  | 6.645 | 9.94E-03 | 4.18  | CWC27              | intronic            |
| 5                                                                 | rs10059206 | 64142674  | q12.3  | A  | 0.1974 | 0.0556 | G  | 6.645 | 9.94E-03 | 4.18  | CWC27              | intronic            |
| 23                                                                | rs2855699  | 32684449  | p21.1  | A  | 0.4000 | 0.1698 | G  | 6.46  | 1.10E-02 | 3.259 | DMD                | intronic            |
| 11                                                                | rs16928480 | 36158286  | p13    | C  | 0.1711 | 0.0417 | T  | 6.419 | 1.13E-02 | 4.746 | LDLRAD3            | intronic            |
| 13                                                                | rs2806283  | 99120688  | q32.3  | C  | 0.1711 | 0.0417 | T  | 6.419 | 1.13E-02 | 4.746 | CLYBL              | intronic            |
| 5                                                                 | rs4585482  | 120518563 | q23.1  | C  | 0.1711 | 0.0417 | A  | 6.419 | 1.13E-02 | 4.746 |                    |                     |
| 3                                                                 | rs6768081  | 30503493  | p24.1  | A  | 0.1711 | 0.0417 | G  | 6.419 | 1.13E-02 | 4.746 |                    |                     |
| 2                                                                 | rs2698189  | 61121796  | p16.1  | C  | 0.1216 | 0.0143 | T  | 6.413 | 1.13E-02 | 9.554 | PEX13              | intronic            |
| 11                                                                | rs12360927 | 124709463 | q24.2  | A  | 0.1184 | 0.0139 | G  | 6.413 | 1.13E-02 | 9.537 | PKNOX2             | intronic            |
| 13                                                                | rs12861751 | 60217996  | q21.2  | A  | 0.1184 | 0.0139 | G  | 6.413 | 1.13E-02 | 9.537 |                    |                     |
| 13                                                                | rs1572023  | 60232512  | q21.2  | A  | 0.1184 | 0.0139 | G  | 6.413 | 1.13E-02 | 9.537 |                    |                     |
| 1                                                                 | rs17017931 | 107255126 | p13.3  | G  | 0.1184 | 0.0139 | A  | 6.413 | 1.13E-02 | 9.537 |                    |                     |
| 13                                                                | rs3119877  | 60279082  | q21.2  | G  | 0.1184 | 0.0139 | A  | 6.413 | 1.13E-02 | 9.537 |                    |                     |
| 10                                                                | rs353207   | 6823268   | p14    | C  | 0.1184 | 0.0139 | T  | 6.413 | 1.13E-02 | 9.537 |                    |                     |
| 10                                                                | rs353208   | 6823114   | p14    | C  | 0.1184 | 0.0139 | T  | 6.413 | 1.13E-02 | 9.537 |                    |                     |
| 8                                                                 | rs437707   | 17909112  | p22    | G  | 0.1184 | 0.0139 | A  | 6.413 | 1.13E-02 | 9.537 | PCM1               | intronic            |
| 1                                                                 | rs4506448  | 229229266 | q42.2  | T  | 0.1184 | 0.0139 | C  | 6.413 | 1.13E-02 | 9.537 | FAM89A             | intronic            |
| 2                                                                 | rs6728021  | 32975008  | p22.3  | G  | 0.1184 | 0.0139 | A  | 6.413 | 1.13E-02 | 9.537 | LINC00486          | intronic            |
| 5                                                                 | rs6884996  | 168509507 | q35.1  | T  | 0.2368 | 0.0833 | C  | 6.413 | 1.13E-02 | 3.414 | SLIT3              | intronic            |
| 18                                                                | rs12456004 | 64738587  | q22.1  | C  | 0.2763 | 0.1111 | A  | 6.405 | 1.14E-02 | 3.055 | CCDC102B           | intronic            |
| 5                                                                 | rs1445803  | 13931843  | p15.2  | A  | 0.2763 | 0.1111 | C  | 6.405 | 1.14E-02 | 3.055 | DNAH5              | intronic            |
| 4                                                                 | rs975477   | 139759112 | q31.1  | A  | 0.2763 | 0.1111 | G  | 6.405 | 1.14E-02 | 3.055 |                    |                     |
| 10                                                                | rs10998853 | 70976314  | q22.1  | A  | 0.1714 | 0.0417 | G  | 6.326 | 1.19E-02 | 4.759 |                    |                     |
| 11                                                                | rs11031538 | 31925200  | p13    | G  | 0.1447 | 0.0278 | T  | 6.312 | 1.20E-02 | 5.923 | RCN1               | intronic            |
| 3                                                                 | rs11130783 | 60736055  | p14.2  | T  | 0.1447 | 0.0278 | C  | 6.312 | 1.20E-02 | 5.923 | FHIT               | intronic            |
| 4                                                                 | rs1398043  | 34422303  | p15.1  | A  | 0.1447 | 0.0278 | C  | 6.312 | 1.20E-02 | 5.923 |                    |                     |
| 4                                                                 | rs1511862  | 34434019  | p15.1  | C  | 0.1447 | 0.0278 | T  | 6.312 | 1.20E-02 | 5.923 |                    |                     |
| 11                                                                | rs547008   | 121523071 | q24.1  | T  | 0.1447 | 0.0278 | C  | 6.312 | 1.20E-02 | 5.923 | MIRLET7A2/MIR100HG | Supstream/intronic  |
| 4                                                                 | rs6815830  | 14516033  | p15.33 | C  | 0.1447 | 0.0278 | T  | 6.312 | 1.20E-02 | 5.923 |                    |                     |
| 9                                                                 | rs9919066  | 106766642 | q31.1  | T  | 0.1447 | 0.0278 | C  | 6.312 | 1.20E-02 | 5.923 |                    |                     |
| 13                                                                | rs884318   | 60219685  | q21.2  | C  | 0.1184 | 0.0143 | T  | 6.193 | 1.28E-02 | 9.269 |                    |                     |
| 4                                                                 | rs976057   | 29802859  | p15.1  | G  | 0.1711 | 0.0429 | A  | 6.137 | 1.32E-02 | 4.608 |                    |                     |
| 12                                                                | rs10859997 | 94909490  | q23.1  | T  | 0.2105 | 0.0694 | C  | 6.044 | 1.40E-02 | 3.573 | HAL                | intronic            |
| 5                                                                 | rs10940065 | 65889320  | q12.3  | G  | 0.2105 | 0.0694 | A  | 6.044 | 1.40E-02 | 3.573 |                    |                     |
| 13                                                                | rs1478654  | 54079192  | q14.3  | A  | 0.2105 | 0.0694 | G  | 6.044 | 1.40E-02 | 3.573 |                    |                     |
| 3                                                                 | rs17040736 | 4490191   | p26.1  | T  | 0.2105 | 0.0694 | G  | 6.044 | 1.40E-02 | 3.573 |                    |                     |
| 1                                                                 | rs1766807  | 119208283 | p12    | G  | 0.2105 | 0.0694 | A  | 6.044 | 1.40E-02 | 3.573 |                    |                     |
| 7                                                                 | rs2529015  | 20293111  | p21.1  | A  | 0.2105 | 0.0694 | G  | 6.044 | 1.40E-02 | 3.573 |                    |                     |
| 12                                                                | rs2576956  | 102796319 | q23.3  | A  | 0.2105 | 0.0694 | G  | 6.044 | 1.40E-02 | 3.573 | GNN                | intronic            |
| 10                                                                | rs2767699  | 7447340   | p14    | C  | 0.2105 | 0.0694 | T  | 6.044 | 1.40E-02 | 3.573 | SFMBT2             | intronic            |
| 5                                                                 | rs340697   | 8475435   | p15.31 | T  | 0.2105 | 0.0694 | C  | 6.044 | 1.40E-02 | 3.573 | LOC729506          | non-coding intronic |
| 4                                                                 | rs6833118  | 6884695   | p16.1  | T  | 0.2105 | 0.0694 | C  | 6.044 | 1.40E-02 | 3.573 | KIAA0232           | intronic            |
| 13                                                                | rs9527234  | 54080824  | q14.3  | C  | 0.2105 | 0.0694 | T  | 6.044 | 1.40E-02 | 3.573 |                    |                     |
| 13                                                                | rs9536797  | 54140619  | q14.3  | C  | 0.2105 | 0.0694 | A  | 6.044 | 1.40E-02 | 3.573 |                    |                     |
| 12                                                                | rs9669708  | 102786200 | q23.3  | T  | 0.2105 | 0.0694 | G  | 6.044 | 1.40E-02 | 3.573 | GNN                | Supstream/intronic  |
| 11                                                                | rs4638337  | 111777399 | q23.1  | C  | 0.2500 | 0.0972 | A  | 5.959 | 1.46E-02 | 3.095 |                    |                     |
| 12                                                                | rs701039   | 123570315 | q24.31 | C  | 0.2500 | 0.0972 | T  | 5.959 | 1.46E-02 | 3.095 | NCOR2              | intronic/Supstream  |

|    |            |           |        |   |        |        |   |       |          |       |            |                     |
|----|------------|-----------|--------|---|--------|--------|---|-------|----------|-------|------------|---------------------|
| 11 | rs7932795  | 111786436 | q23.1  | G | 0.2500 | 0.0972 | A | 5.959 | 1.46E-02 | 3.095 |            |                     |
| 14 | rs6575129  | 89913545  | q32.11 | T | 0.2297 | 0.0833 | G | 5.893 | 1.52E-02 | 3.281 |            |                     |
| 8  | rs10505201 | 114295819 | q23.3  | A | 0.1622 | 0.0417 | G | 5.748 | 1.65E-02 | 4.452 | CSMD3      | intronic            |
| 5  | rs13158904 | 65572109  | q12.3  | A | 0.1842 | 0.0556 | G | 5.729 | 1.67E-02 | 3.839 |            |                     |
| 3  | rs17040776 | 4505278   | p26.1  | C | 0.1842 | 0.0556 | A | 5.729 | 1.67E-02 | 3.839 | ITPR1_AS1  | 3downstream         |
| 7  | rs2348558  | 7808086   | p21.3  | C | 0.1842 | 0.0556 | T | 5.729 | 1.67E-02 | 3.839 | LOC729852  | intronic            |
| 11 | rs511514   | 121498790 | q24.1  | G | 0.1842 | 0.0556 | A | 5.729 | 1.67E-02 | 3.839 | MIR100HG   | non-coding intronic |
| 12 | rs636299   | 51238751  | q13.13 | T | 0.1842 | 0.0556 | G | 5.729 | 1.67E-02 | 3.839 |            |                     |
| 10 | rs604772   | 13096593  | p13    | C | 0.2105 | 0.0714 | T | 5.725 | 1.67E-02 | 3.467 | CCDC3      | non-coding intronic |
| 22 | rs715001   | 42075141  | q13.2  | A | 0.2105 | 0.0714 | C | 5.725 | 1.67E-02 | 3.467 |            |                     |
| 5  | rs16888617 | 21726343  | p14.3  | A | 0.1081 | 0.0139 | C | 5.601 | 1.80E-02 | 8.606 | BC038535   | non-coding intronic |
| 11 | rs7945210  | 26673637  | p14.2  | C | 0.1389 | 0.0286 | T | 5.583 | 1.81E-02 | 5.484 | SLC5A12    | intronic            |
| 3  | rs11917422 | 142505177 | q23    | C | 0.2237 | 0.0833 | T | 5.549 | 1.85E-02 | 3.169 |            |                     |
| 19 | rs1476592  | 3630740   | p13.3  | G | 0.2237 | 0.0833 | A | 5.549 | 1.85E-02 | 3.169 | PIP5K1C    | intronic            |
| 2  | rs17032466 | 66768195  | p14    | G | 0.2237 | 0.0833 | A | 5.549 | 1.85E-02 | 3.169 | AC007392.3 | non-coding intronic |
| 14 | rs17833053 | 58251677  | q23.1  | A | 0.2237 | 0.0833 | G | 5.549 | 1.85E-02 | 3.169 |            |                     |
| 1  | rs10159449 | 107577827 | p13.3  | G | 0.1579 | 0.0417 | A | 5.484 | 1.92E-02 | 4.312 | NTNG1      | intronic            |
| 12 | rs11609754 | 124798180 | q24.32 | C | 0.1579 | 0.0417 | T | 5.484 | 1.92E-02 | 4.312 |            |                     |
| 15 | rs11638359 | 96460308  | q26.3  | G | 0.1579 | 0.0417 | A | 5.484 | 1.92E-02 | 4.312 |            |                     |
| 16 | rs11646232 | 53648412  | q12.2  | T | 0.1579 | 0.0417 | G | 5.484 | 1.92E-02 | 4.312 |            |                     |
| 22 | rs13057831 | 41203476  | q13.2  | C | 0.1579 | 0.0417 | T | 5.484 | 1.92E-02 | 4.312 |            |                     |
| 10 | rs7903957  | 28502025  | p12.1  | A | 0.1579 | 0.0417 | G | 5.484 | 1.92E-02 | 4.312 | MPP7       | intronic            |
| 6  | rs9342947  | 73222052  | q13    | C | 0.1579 | 0.0417 | T | 5.484 | 1.92E-02 | 4.312 |            |                     |
| 13 | rs9536319  | 52394664  | q14.3  | T | 0.1579 | 0.0417 | C | 5.484 | 1.92E-02 | 4.312 |            |                     |
| 3  | rs12637065 | 145748530 | q24    | T | 0.2027 | 0.0694 | G | 5.482 | 1.92E-02 | 3.407 |            |                     |
| 14 | rs3784039  | 73559488  | q24.3  | T | 0.2027 | 0.0694 | C | 5.482 | 1.92E-02 | 3.407 | CCDC176    | coding              |
| 3  | rs10490826 | 145745200 | q24    | C | 0.1053 | 0.0139 | T | 5.405 | 2.01E-02 | 8.353 |            |                     |
| 5  | rs10514254 | 82669707  | q14.2  | A | 0.1053 | 0.0139 | G | 5.405 | 2.01E-02 | 8.353 | XRCC4      | intronic            |
| 13 | rs12429374 | 69292832  | q21.33 | G | 0.1053 | 0.0139 | T | 5.405 | 2.01E-02 | 8.353 | KLHL1      | intronic            |
| 12 | rs12819069 | 31281817  | p11.21 | C | 0.1053 | 0.0139 | T | 5.405 | 2.01E-02 | 8.353 |            |                     |
| 1  | rs17301783 | 60847990  | p32.1  | T | 0.1053 | 0.0139 | C | 5.405 | 2.01E-02 | 8.353 |            |                     |
| 5  | rs17439022 | 32525961  | p13.3  | A | 0.1053 | 0.0139 | C | 5.405 | 2.01E-02 | 8.353 |            |                     |
| 2  | rs17481321 | 47078431  | p21    | A | 0.1053 | 0.0139 | C | 5.405 | 2.01E-02 | 8.353 | TTC7A      | intronic            |
| 8  | rs17504762 | 38589163  | p11.22 | G | 0.1053 | 0.0139 | A | 5.405 | 2.01E-02 | 8.353 |            |                     |
| 13 | rs1890046  | 69262301  | q21.33 | A | 0.1053 | 0.0139 | G | 5.405 | 2.01E-02 | 8.353 | KLHL1      | intronic            |
| 12 | rs7139314  | 109408254 | q24.11 | A | 0.1053 | 0.0139 | G | 5.405 | 2.01E-02 | 8.353 | FAM216A    | intronic            |
| 8  | rs960609   | 120294053 | q24.12 | A | 0.1053 | 0.0139 | G | 5.405 | 2.01E-02 | 8.353 | MAL2       | intronic            |
| 7  | rs17704630 | 95076579  | q21.3  | A | 0.1351 | 0.0286 | G | 5.348 | 2.08E-02 | 5.312 |            |                     |
| 8  | rs2688266  | 3778770   | p23.2  | G | 0.1351 | 0.0286 | A | 5.348 | 2.08E-02 | 5.312 | CSMD1      | intronic            |
| 6  | rs1040939  | 44621319  | p21.1  | T | 0.1316 | 0.0278 | C | 5.347 | 2.08E-02 | 5.303 |            |                     |
| 10 | rs12569831 | 33807553  | p11.22 | A | 0.1316 | 0.0278 | G | 5.347 | 2.08E-02 | 5.303 |            |                     |
| 5  | rs1390663  | 21725594  | p14.3  | C | 0.1316 | 0.0278 | A | 5.347 | 2.08E-02 | 5.303 | BC038535   | non-coding intronic |
| 11 | rs17309356 | 26664973  | p14.2  | A | 0.1316 | 0.0278 | G | 5.347 | 2.08E-02 | 5.303 | SLC5A12    | non-coding intronic |
| 1  | rs17680745 | 110825891 | p13.3  | T | 0.1316 | 0.0278 | C | 5.347 | 2.08E-02 | 5.303 | CYMP       | non-coding intronic |
| 10 | rs1925260  | 119570720 | q26.11 | A | 0.1316 | 0.0278 | G | 5.347 | 2.08E-02 | 5.303 |            |                     |
| 10 | rs2997203  | 28485509  | p12.1  | T | 0.1316 | 0.0278 | C | 5.347 | 2.08E-02 | 5.303 | MPP7       | intronic            |
| 2  | rs3820700  | 73570318  | p13.1  | T | 0.1316 | 0.0278 | C | 5.347 | 2.08E-02 | 5.303 | ALMS1      | coding              |
| 8  | rs417994   | 17735510  | p22    | C | 0.1316 | 0.0278 | T | 5.347 | 2.08E-02 | 5.303 |            |                     |
| 16 | rs7196605  | 72145309  | q22.3  | C | 0.1316 | 0.0278 | T | 5.347 | 2.08E-02 | 5.303 |            |                     |
| 12 | rs10850906 | 116743249 | q24.23 | T | 0.1053 | 0.0143 | C | 5.214 | 2.24E-02 | 8.118 | KSR2       | intronic            |
| 15 | rs5006363  | 20398953  | q11.2  | A | 0.1081 | 0.0147 | C | 5.208 | 2.25E-02 | 8.121 | TUBGCP5    | intronic/5UPSTREAM  |
| 4  | rs187196   | 21113711  | p15.2  | T | 0.1111 | 0.0152 | C | 5.201 | 2.26E-02 | 8.125 | KCNIP4     | intronic            |
| 20 | rs6133438  | 7519155   | p12.3  | G | 0.2027 | 0.0714 | A | 5.183 | 2.28E-02 | 3.305 |            |                     |
| 14 | rs10873266 | 73755366  | q24.3  | T | 0.1974 | 0.0694 | C | 5.177 | 2.29E-02 | 3.295 |            |                     |
| 7  | rs11762933 | 33888281  | p14.3  | A | 0.1974 | 0.0694 | G | 5.177 | 2.29E-02 | 3.295 | AK025321   | Supstream           |
| 11 | rs11827471 | 119627604 | q23.3  | G | 0.1974 | 0.0694 | A | 5.177 | 2.29E-02 | 3.295 | POU2F3     | intronic            |
| 5  | rs12520189 | 143546081 | q31.3  | A | 0.1974 | 0.0694 | G | 5.177 | 2.29E-02 | 3.295 | KCTD16     | intronic            |
| 9  | rs1538581  | 71081576  | q21.11 | T | 0.1974 | 0.0694 | C | 5.177 | 2.29E-02 | 3.295 |            |                     |
| 3  | rs1574130  | 126255281 | q21.2  | A | 0.1974 | 0.0694 | G | 5.177 | 2.29E-02 | 3.295 | HEG1       | intronic            |
| 17 | rs16959281 | 9918192   | p13.1  | T | 0.1974 | 0.0694 | C | 5.177 | 2.29E-02 | 3.295 | GAS7       | intronic            |
| 5  | rs17101605 | 143516897 | q31.3  | A | 0.1974 | 0.0694 | C | 5.177 | 2.29E-02 | 3.295 | YIPF5      | 3downstream         |
| 14 | rs2300193  | 73637489  | q24.3  | G | 0.1974 | 0.0694 | A | 5.177 | 2.29E-02 | 3.295 | LIN52      | intronic            |
| 1  | rs4276859  | 24288720  | p36.11 | T | 0.1974 | 0.0694 | C | 5.177 | 2.29E-02 | 3.295 | MYOM3      | coding              |
| 5  | rs7704225  | 143508167 | q31.3  | A | 0.1974 | 0.0694 | G | 5.177 | 2.29E-02 | 3.295 |            |                     |
| 7  | rs7787218  | 33904913  | p14.3  | C | 0.1974 | 0.0694 | T | 5.177 | 2.29E-02 | 3.295 |            |                     |
| 14 | rs848049   | 36388208  | q13.3  | T | 0.1974 | 0.0694 | C | 5.177 | 2.29E-02 | 3.295 | SLC25A21   | intronic            |
| 11 | rs10500905 | 21333247  | p15.1  | G | 0.1316 | 0.0286 | A | 5.125 | 2.36E-02 | 5.152 | NELL1      | intronic            |
| 4  | rs1355161  | 126487591 | q28.1  | G | 0.1316 | 0.0286 | A | 5.125 | 2.36E-02 | 5.152 | FAT4       | intronic            |
| 2  | rs1560251  | 227362192 | q36.3  | T | 0.1757 | 0.0556 | G | 5.118 | 2.37E-02 | 3.623 | IRS1       | intronic            |
| 12 | rs17730330 | 91522645  | q22    | G | 0.1757 | 0.0556 | A | 5.118 | 2.37E-02 | 3.623 |            |                     |
| 7  | rs7789161  | 53588859  | p12.1  | T | 0.1757 | 0.0556 | C | 5.118 | 2.37E-02 | 3.623 |            |                     |
| 13 | rs646063   | 29440630  | q12.3  | C | 0.1286 | 0.0278 | T | 5.046 | 2.47E-02 | 5.164 |            |                     |
| 1  | rs2594683  | 104755888 | p21.1  | T | 0.1053 | 0.0147 | C | 5.023 | 2.50E-02 | 7.882 |            |                     |

|    |            |           |        |   |        |        |   |       |          |       |           |                           |
|----|------------|-----------|--------|---|--------|--------|---|-------|----------|-------|-----------|---------------------------|
| 13 | rs2147151  | 107957928 | q33.3  | T | 0.1000 | 0.0139 | G | 4.95  | 2.61E-02 | 7.889 |           |                           |
| 11 | rs578193   | 56240622  | q12.1  | T | 0.1000 | 0.0139 | C | 4.95  | 2.61E-02 | 7.889 | OR8U8     | intronic                  |
| 2  | rs6758645  | 76424948  | p12    | C | 0.1316 | 0.0294 | T | 4.904 | 2.68E-02 | 5     |           |                           |
| 8  | rs12676965 | 37800584  | p11.23 | C | 0.1974 | 0.0714 | T | 4.889 | 2.70E-02 | 3.197 | GPR124    | intronic                  |
| 1  | rs7528206  | 18679704  | p36.13 | C | 0.1974 | 0.0714 | T | 4.889 | 2.70E-02 | 3.197 | KLHDC7A   | Supstream                 |
| 23 | rs4829124  | 32673682  | p21.1  | A | 0.2045 | 0.0566 | G | 4.854 | 2.76E-02 | 4.286 | DMD       | intronic                  |
| 4  | rs10010385 | 82583986  | q21.21 | C | 0.1711 | 0.0556 | T | 4.851 | 2.76E-02 | 3.508 | RASGEF1B  | intronic                  |
| 9  | rs1032474  | 14765853  | p22.3  | A | 0.1711 | 0.0556 | G | 4.851 | 2.76E-02 | 3.508 | FREM1     | coding/Supstream/intronic |
| 12 | rs10492340 | 91501595  | q22    | C | 0.1711 | 0.0556 | T | 4.851 | 2.76E-02 | 3.508 |           |                           |
| 5  | rs1422687  | 164787735 | q34    | T | 0.1711 | 0.0556 | C | 4.851 | 2.76E-02 | 3.508 |           |                           |
| 7  | rs1880740  | 48244761  | p12.3  | A | 0.1711 | 0.0556 | G | 4.851 | 2.76E-02 | 3.508 | ABCA13    | intronic                  |
| 20 | rs2232081  | 6008395   | p12.3  | A | 0.1711 | 0.0556 | G | 4.851 | 2.76E-02 | 3.508 | FERMT1    | intronic                  |
| 15 | rs275178   | 37235472  | q14    | T | 0.1711 | 0.0556 | C | 4.851 | 2.76E-02 | 3.508 |           |                           |
| 9  | rs4415414  | 14768244  | p22.3  | T | 0.1711 | 0.0556 | G | 4.851 | 2.76E-02 | 3.508 | FREM1     | intronic                  |
| 2  | rs4468781  | 19946372  | p24.1  | C | 0.1711 | 0.0556 | T | 4.851 | 2.76E-02 | 3.508 | LINC00954 | non-coding intronic       |
| 4  | rs6448609  | 28518653  | p15.1  | T | 0.1711 | 0.0556 | G | 4.851 | 2.76E-02 | 3.508 |           |                           |
| 7  | rs705358   | 90515611  | q21.13 | T | 0.1711 | 0.0556 | C | 4.851 | 2.76E-02 | 3.508 | CDK14     | intronic                  |
| 13 | rs7336718  | 89280044  | q31.3  | G | 0.1711 | 0.0556 | A | 4.851 | 2.76E-02 | 3.508 |           |                           |
| 2  | rs7579437  | 20591570  | p24.1  | A | 0.1711 | 0.0556 | G | 4.851 | 2.76E-02 | 3.508 |           |                           |
| 6  | rs9465946  | 21117867  | p22.3  | G | 0.1711 | 0.0556 | A | 4.851 | 2.76E-02 | 3.508 | CDKAL1    | intronic                  |
| 13 | rs9522755  | 89275755  | q31.3  | T | 0.1711 | 0.0556 | C | 4.851 | 2.76E-02 | 3.508 |           |                           |
| 13 | rs9522767  | 89301151  | q31.3  | C | 0.1711 | 0.0556 | T | 4.851 | 2.76E-02 | 3.508 |           |                           |
| 13 | rs9538881  | 60180632  | q21.2  | C | 0.1711 | 0.0556 | T | 4.851 | 2.76E-02 | 3.508 |           |                           |
| 8  | rs2688304  | 3781284   | p23.2  | G | 0.2143 | 0.0833 | T | 4.83  | 2.80E-02 | 3     | CSMD1     | intronic                  |
| 11 | rs7108738  | 15666660  | p15.2  | G | 0.2143 | 0.0833 | T | 4.83  | 2.80E-02 | 3     |           |                           |
| 8  | rs11987577 | 54049972  | q11.23 | T | 0.1486 | 0.0417 | C | 4.818 | 2.82E-02 | 4.016 |           |                           |
| 7  | rs12234501 | 8738675   | p21.3  | T | 0.1486 | 0.0417 | C | 4.818 | 2.82E-02 | 4.016 | NXPH1     | intronic                  |
| 12 | rs2277383  | 50600655  | q13.13 | G | 0.1486 | 0.0417 | T | 4.818 | 2.82E-02 | 4.016 | ACVRL1    | intronic                  |
| 23 | rs195268   | 79125114  | q21.1  | G | 0.1333 | 0.0189 | A | 4.808 | 2.83E-02 | 8     |           |                           |
| 23 | rs929228   | 8781555   | p22.31 | C | 0.1333 | 0.0189 | T | 4.808 | 2.83E-02 | 8     |           |                           |
| 23 | rs2795289  | 136667419 | q26.3  | T | 0.2000 | 0.0566 | C | 4.657 | 3.09E-02 | 4.167 |           |                           |
| 13 | rs3106557  | 60224141  | q21.2  | A | 0.1892 | 0.0694 | G | 4.622 | 3.16E-02 | 3.127 |           |                           |
| 5  | rs3805608  | 127508897 | q23.3  | A | 0.1892 | 0.0694 | G | 4.622 | 3.16E-02 | 3.127 | SLC12A2   | intronic                  |
| 17 | rs7224163  | 109700    | p13.3  | G | 0.1216 | 0.0278 | A | 4.613 | 3.17E-02 | 4.846 | RPH3AL    | intronic                  |
| 12 | rs9783406  | 94565342  | q22    | T | 0.1216 | 0.0278 | C | 4.613 | 3.17E-02 | 4.846 | PGAM1P5   | Supstream                 |
| 9  | rs2809841  | 82979213  | q21.31 | T | 0.1711 | 0.0571 | G | 4.596 | 3.21E-02 | 3.405 |           |                           |
| 17 | rs4290532  | 68530900  | q25.1  | G | 0.1711 | 0.0571 | A | 4.596 | 3.21E-02 | 3.405 | SLC39A11  | intronic                  |
| 1  | rs946819   | 176261095 | q25.2  | A | 0.1711 | 0.0571 | G | 4.596 | 3.21E-02 | 3.405 | SEC16B    | intronic                  |
| 4  | rs13150558 | 61870241  | q13.1  | A | 0.0972 | 0.0143 | G | 4.592 | 3.21E-02 | 7.431 | LPHN3     | intronic                  |
| 3  | rs6766872  | 32720800  | p22.3  | G | 0.1757 | 0.0588 | T | 4.591 | 3.21E-02 | 3.41  | CNOT10    | intronic/5UPSTREAM        |
| 3  | rs11715062 | 54534143  | p14.3  | T | 0.0946 | 0.0139 | C | 4.589 | 3.22E-02 | 7.418 | CACNA2D3  | intronic                  |
| 2  | rs17013391 | 33652246  | p22.3  | G | 0.0946 | 0.0139 | A | 4.589 | 3.22E-02 | 7.418 |           |                           |
| 4  | rs7661156  | 125574490 | q28.1  | G | 0.0946 | 0.0139 | A | 4.589 | 3.22E-02 | 7.418 |           |                           |
| 8  | rs10505571 | 132586517 | q24.22 | T | 0.1447 | 0.0417 | C | 4.586 | 3.22E-02 | 3.892 |           |                           |
| 5  | rs10512747 | 40877498  | p13.1  | T | 0.1447 | 0.0417 | C | 4.586 | 3.22E-02 | 3.892 | CARD6     | coding                    |
| 4  | rs10517601 | 155853294 | q32.1  | G | 0.1447 | 0.0417 | A | 4.586 | 3.22E-02 | 3.892 | DQ266889  | non-coding intronic       |
| 12 | rs10770674 | 20646893  | p12.2  | C | 0.1447 | 0.0417 | T | 4.586 | 3.22E-02 | 3.892 | PDE3A     | intronic                  |
| 7  | rs1108845  | 151153648 | q36.1  | A | 0.1447 | 0.0417 | G | 4.586 | 3.22E-02 | 3.892 | PRKAG2    | intronic                  |
| 11 | rs11226195 | 103511271 | q22.3  | T | 0.1447 | 0.0417 | C | 4.586 | 3.22E-02 | 3.892 | PDGFD     | intronic                  |
| 11 | rs12277818 | 103507652 | q22.3  | T | 0.1447 | 0.0417 | C | 4.586 | 3.22E-02 | 3.892 | PDGFD     | intronic                  |
| 2  | rs13414599 | 179928297 | q31.2  | A | 0.1447 | 0.0417 | G | 4.586 | 3.22E-02 | 3.892 |           |                           |
| 18 | rs1395813  | 71869875  | q23    | T | 0.1447 | 0.0417 | C | 4.586 | 3.22E-02 | 3.892 |           |                           |
| 4  | rs16875239 | 23787325  | p15.2  | A | 0.1447 | 0.0417 | G | 4.586 | 3.22E-02 | 3.892 | PPARGC1A  | non-coding intronic       |
| 8  | rs17605272 | 114181979 | q23.3  | T | 0.1447 | 0.0417 | C | 4.586 | 3.22E-02 | 3.892 | CSMD3     | intronic                  |
| 10 | rs2254849  | 70985384  | q22.1  | T | 0.1447 | 0.0417 | C | 4.586 | 3.22E-02 | 3.892 |           |                           |
| 21 | rs2269139  | 42977018  | q22.3  | T | 0.1447 | 0.0417 | C | 4.586 | 3.22E-02 | 3.892 | PDE9A     | intronic                  |
| 15 | rs4777161  | 67648593  | q23    | A | 0.1447 | 0.0417 | G | 4.586 | 3.22E-02 | 3.892 | LOC145837 | non-coding intronic       |
| 15 | rs6494808  | 67655995  | q23    | T | 0.1447 | 0.0417 | C | 4.586 | 3.22E-02 | 3.892 |           |                           |
| 8  | rs6996697  | 114343451 | q23.3  | G | 0.1447 | 0.0417 | A | 4.586 | 3.22E-02 | 3.892 | CSMD3     | intronic                  |
| 8  | rs736726   | 132587879 | q24.22 | A | 0.1447 | 0.0417 | G | 4.586 | 3.22E-02 | 3.892 |           |                           |
| 12 | rs7956157  | 81836159  | q21.31 | C | 0.1447 | 0.0417 | A | 4.586 | 3.22E-02 | 3.892 | TMTC2     | intronic                  |
| 14 | rs8021398  | 75916679  | q24.3  | T | 0.1447 | 0.0417 | C | 4.586 | 3.22E-02 | 3.892 | ESRRB     | intronic                  |
| 11 | rs924561   | 103504269 | q22.3  | G | 0.1447 | 0.0417 | A | 4.586 | 3.22E-02 | 3.892 | PDGFD     | intronic                  |
| 6  | rs9503907  | 4002541   | p25.2  | G | 0.1447 | 0.0417 | T | 4.586 | 3.22E-02 | 3.892 | PRPF4B    | intronic                  |
| 13 | rs9522712  | 89239579  | q31.3  | T | 0.1447 | 0.0417 | C | 4.586 | 3.22E-02 | 3.892 |           |                           |
| 2  | rs7559158  | 33690426  | p22.3  | C | 0.1667 | 0.0556 | A | 4.5   | 3.39E-02 | 3.4   |           |                           |
| 5  | rs10058813 | 27423142  | p14.1  | T | 0.0921 | 0.0139 | G | 4.424 | 3.54E-02 | 7.203 |           |                           |
| 2  | rs10496905 | 142352930 | q22.2  | G | 0.0921 | 0.0139 | A | 4.424 | 3.54E-02 | 7.203 | LRP1B     | intronic                  |
| 10 | rs10732804 | 112785011 | q25.2  | A | 0.0921 | 0.0139 | G | 4.424 | 3.54E-02 | 7.203 |           |                           |
| 11 | rs1117170  | 96709050  | q22.1  | T | 0.0921 | 0.0139 | G | 4.424 | 3.54E-02 | 7.203 |           |                           |
| 17 | rs11651058 | 8828830   | p13.1  | G | 0.0921 | 0.0139 | A | 4.424 | 3.54E-02 | 7.203 |           |                           |
| 2  | rs11693228 | 17756958  | p24.2  | A | 0.0921 | 0.0139 | G | 4.424 | 3.54E-02 | 7.203 | SMC6      | intronic                  |
| 1  | rs11801137 | 104699371 | p21.1  | G | 0.0921 | 0.0139 | A | 4.424 | 3.54E-02 | 7.203 |           |                           |

|    |            |           |        |   |        |        |   |       |          |       |           |                     |
|----|------------|-----------|--------|---|--------|--------|---|-------|----------|-------|-----------|---------------------|
| 2  | rs12104712 | 82498459  | p12    | T | 0.0921 | 0.0139 | G | 4.424 | 3.54E-02 | 7.203 |           |                     |
| 1  | rs12123337 | 19734998  | p36.13 | C | 0.0921 | 0.0139 | T | 4.424 | 3.54E-02 | 7.203 |           |                     |
| 9  | rs12345817 | 29823969  | p21.1  | G | 0.0921 | 0.0139 | T | 4.424 | 3.54E-02 | 7.203 |           |                     |
| 4  | rs12501459 | 46918110  | p12    | G | 0.0921 | 0.0139 | A | 4.424 | 3.54E-02 | 7.203 | GABRB1    | intronic            |
| 1  | rs12564848 | 172542992 | q25.1  | C | 0.0921 | 0.0139 | T | 4.424 | 3.54E-02 | 7.203 | RABGAP1L  | intronic            |
| 5  | rs13177718 | 108141243 | q21.3  | T | 0.0921 | 0.0139 | C | 4.424 | 3.54E-02 | 7.203 | FER       | non-coding intronic |
| 6  | rs1537590  | 150224322 | q25.1  | C | 0.0921 | 0.0139 | A | 4.424 | 3.54E-02 | 7.203 | LRP11     | intronic            |
| 4  | rs1567111  | 178434231 | q34.3  | G | 0.0921 | 0.0139 | A | 4.424 | 3.54E-02 | 7.203 |           |                     |
| 10 | rs1621751  | 118547458 | q25.3  | G | 0.0921 | 0.0139 | A | 4.424 | 3.54E-02 | 7.203 | HSPA12A   | intronic            |
| 1  | rs16847402 | 172981674 | q25.1  | C | 0.0921 | 0.0139 | T | 4.424 | 3.54E-02 | 7.203 | RABGAP1L  | intronic            |
| 1  | rs16847563 | 173075477 | q25.1  | C | 0.0921 | 0.0139 | T | 4.424 | 3.54E-02 | 7.203 | RABGAP1L  | intronic            |
| 5  | rs16873241 | 71256017  | q13.2  | G | 0.0921 | 0.0139 | A | 4.424 | 3.54E-02 | 7.203 |           |                     |
| 5  | rs16896657 | 27359503  | p14.1  | C | 0.0921 | 0.0139 | T | 4.424 | 3.54E-02 | 7.203 |           |                     |
| 11 | rs16924357 | 7262671   | p15.4  | C | 0.0921 | 0.0139 | A | 4.424 | 3.54E-02 | 7.203 | SYT9      | intronic            |
| 16 | rs16966503 | 62328476  | q21    | C | 0.0921 | 0.0139 | T | 4.424 | 3.54E-02 | 7.203 |           |                     |
| 12 | rs17682012 | 109578837 | q24.11 | T | 0.0921 | 0.0139 | C | 4.424 | 3.54E-02 | 7.203 | HVCN1     | intronic            |
| 1  | rs1890881  | 172443546 | q25.1  | C | 0.0921 | 0.0139 | T | 4.424 | 3.54E-02 | 7.203 | RABGAP1L  | intronic            |
| 9  | rs1927880  | 82363174  | q21.31 | T | 0.0921 | 0.0139 | C | 4.424 | 3.54E-02 | 7.203 |           |                     |
| 14 | rs1957283  | 91837433  | q32.12 | T | 0.0921 | 0.0139 | C | 4.424 | 3.54E-02 | 7.203 |           |                     |
| 1  | rs2072758  | 172792540 | q25.1  | A | 0.0921 | 0.0139 | G | 4.424 | 3.54E-02 | 7.203 | RABGAP1L  | intronic            |
| 17 | rs210834   | 29802339  | q12    | G | 0.0921 | 0.0139 | A | 4.424 | 3.54E-02 | 7.203 |           |                     |
| 1  | rs2430080  | 186050561 | q31.1  | A | 0.0921 | 0.0139 | C | 4.424 | 3.54E-02 | 7.203 |           |                     |
| 1  | rs2430084  | 186047873 | q31.1  | C | 0.0921 | 0.0139 | T | 4.424 | 3.54E-02 | 7.203 |           |                     |
| 12 | rs2471495  | 80715574  | q21.31 | A | 0.0921 | 0.0139 | G | 4.424 | 3.54E-02 | 7.203 |           |                     |
| 1  | rs2506986  | 47878679  | p33    | C | 0.0921 | 0.0139 | A | 4.424 | 3.54E-02 | 7.203 |           |                     |
| 9  | rs2891333  | 29781089  | p21.1  | G | 0.0921 | 0.0139 | T | 4.424 | 3.54E-02 | 7.203 |           |                     |
| 18 | rs359731   | 71854650  | q23    | C | 0.0921 | 0.0139 | T | 4.424 | 3.54E-02 | 7.203 |           |                     |
| 11 | rs4313593  | 67194771  | q13.2  | T | 0.0921 | 0.0139 | C | 4.424 | 3.54E-02 | 7.203 | ALDH3B2   | intronic            |
| 1  | rs4651180  | 182421203 | q25.3  | A | 0.0921 | 0.0139 | G | 4.424 | 3.54E-02 | 7.203 |           |                     |
| 8  | rs4873647  | 53551855  | q11.23 | G | 0.0921 | 0.0139 | A | 4.424 | 3.54E-02 | 7.203 |           |                     |
| 8  | rs4873666  | 53659338  | q11.23 | A | 0.0921 | 0.0139 | G | 4.424 | 3.54E-02 | 7.203 |           |                     |
| 11 | rs7107048  | 11974796  | p15.3  | T | 0.0921 | 0.0139 | C | 4.424 | 3.54E-02 | 7.203 | DKK3      | intronic            |
| 5  | rs717163   | 31893190  | p13.3  | C | 0.0921 | 0.0139 | A | 4.424 | 3.54E-02 | 7.203 | PDZD2     | intronic            |
| 12 | rs7311376  | 109089942 | q24.11 | T | 0.0921 | 0.0139 | C | 4.424 | 3.54E-02 | 7.203 | IFT81     | intronic            |
| 2  | rs7596891  | 45899087  | p21    | T | 0.0921 | 0.0139 | C | 4.424 | 3.54E-02 | 7.203 | PRKCE     | intronic            |
| 12 | rs7966591  | 109128428 | q24.11 | A | 0.0921 | 0.0139 | G | 4.424 | 3.54E-02 | 7.203 | IFT81     | intronic            |
| 14 | rs8018748  | 42191841  | q21.1  | T | 0.0921 | 0.0139 | G | 4.424 | 3.54E-02 | 7.203 |           |                     |
| 12 | rs916973   | 111931486 | q24.13 | C | 0.0921 | 0.0139 | T | 4.424 | 3.54E-02 | 7.203 | OAS2      | 3utr/intronic       |
| 3  | rs9882385  | 156035277 | q25.2  | C | 0.0921 | 0.0139 | A | 4.424 | 3.54E-02 | 7.203 |           |                     |
| 5  | rs10515395 | 108272703 | q21.3  | C | 0.1184 | 0.0278 | T | 4.415 | 3.56E-02 | 4.701 | FER       | non-coding intronic |
| 12 | rs11108364 | 94905106  | q23.1  | G | 0.1184 | 0.0278 | A | 4.415 | 3.56E-02 | 4.701 | HAL       | coding              |
| 12 | rs11169945 | 50561776  | q13.13 | C | 0.1184 | 0.0278 | T | 4.415 | 3.56E-02 | 4.701 |           |                     |
| 1  | rs11577033 | 23910818  | p36.11 | C | 0.1184 | 0.0278 | T | 4.415 | 3.56E-02 | 4.701 |           |                     |
| 1  | rs11587587 | 233625329 | q42.3  | T | 0.1184 | 0.0278 | C | 4.415 | 3.56E-02 | 4.701 | TBCE      | non-coding intronic |
| 1  | rs12135902 | 153022728 | q21.3  | A | 0.1184 | 0.0278 | G | 4.415 | 3.56E-02 | 4.701 | KCNN3     | intronic            |
| 5  | rs12186507 | 20994575  | p14.3  | A | 0.1184 | 0.0278 | C | 4.415 | 3.56E-02 | 4.701 |           |                     |
| 14 | rs12433929 | 91533374  | q32.12 | G | 0.1184 | 0.0278 | A | 4.415 | 3.56E-02 | 4.701 | TRIP11    | intronic            |
| 1  | rs12745648 | 233605643 | q42.3  | G | 0.1184 | 0.0278 | A | 4.415 | 3.56E-02 | 4.701 | TBCE      | intronic            |
| 1  | rs12757197 | 233657182 | q42.3  | A | 0.1184 | 0.0278 | G | 4.415 | 3.56E-02 | 4.701 | TBCE      | intronic            |
| 15 | rs12902244 | 99789578  | q26.3  | C | 0.1184 | 0.0278 | T | 4.415 | 3.56E-02 | 4.701 | PCSK6     | intronic            |
| 18 | rs1431381  | 6802509   | p11.31 | A | 0.1184 | 0.0278 | C | 4.415 | 3.56E-02 | 4.701 | ARHGAP28  | intronic            |
| 2  | rs16862382 | 15198595  | p24.3  | G | 0.1184 | 0.0278 | A | 4.415 | 3.56E-02 | 4.701 |           |                     |
| 6  | rs16900468 | 158181346 | q25.3  | A | 0.1184 | 0.0278 | G | 4.415 | 3.56E-02 | 4.701 | SNX9      | intronic            |
| 11 | rs16906047 | 20306246  | p15.1  | T | 0.1184 | 0.0278 | G | 4.415 | 3.56E-02 | 4.701 |           |                     |
| 9  | rs16928802 | 128031443 | q33.3  | T | 0.1184 | 0.0278 | C | 4.415 | 3.56E-02 | 4.701 |           |                     |
| 13 | rs17532490 | 40581061  | q14.11 | A | 0.1184 | 0.0278 | G | 4.415 | 3.56E-02 | 4.701 |           |                     |
| 6  | rs17712040 | 153452788 | q25.2  | C | 0.1184 | 0.0278 | T | 4.415 | 3.56E-02 | 4.701 | RGS17     | intronic            |
| 14 | rs17807815 | 91625808  | q32.12 | C | 0.1184 | 0.0278 | T | 4.415 | 3.56E-02 | 4.701 | ATXN3     | intronic            |
| 8  | rs2410584  | 18646634  | p22    | G | 0.1184 | 0.0278 | A | 4.415 | 3.56E-02 | 4.701 | PSD3      | intronic            |
| 7  | rs288758   | 155319096 | q36.3  | A | 0.1184 | 0.0278 | G | 4.415 | 3.56E-02 | 4.701 |           |                     |
| 13 | rs3119878  | 60282057  | q21.2  | A | 0.1184 | 0.0278 | G | 4.415 | 3.56E-02 | 4.701 |           |                     |
| 17 | rs3743990  | 71102780  | q25.1  | T | 0.1184 | 0.0278 | C | 4.415 | 3.56E-02 | 4.701 | MYO15B    | intronic            |
| 21 | rs3819895  | 42970809  | q22.3  | C | 0.1184 | 0.0278 | T | 4.415 | 3.56E-02 | 4.701 | PDE9A     | intronic            |
| 15 | rs4442780  | 71006306  | q24.1  | C | 0.1184 | 0.0278 | T | 4.415 | 3.56E-02 | 4.701 |           |                     |
| 13 | rs561605   | 29461154  | q12.3  | G | 0.1184 | 0.0278 | A | 4.415 | 3.56E-02 | 4.701 |           |                     |
| 20 | rs6135817  | 1663448   | p13    | T | 0.1184 | 0.0278 | C | 4.415 | 3.56E-02 | 4.701 |           |                     |
| 10 | rs684903   | 7438806   | p14    | C | 0.1184 | 0.0278 | T | 4.415 | 3.56E-02 | 4.701 | SFMBT2    | intronic            |
| 9  | rs7042583  | 137244189 | q34.3  | T | 0.1184 | 0.0278 | C | 4.415 | 3.56E-02 | 4.701 |           |                     |
| 8  | rs799887   | 117322902 | q23.3  | G | 0.1184 | 0.0278 | A | 4.415 | 3.56E-02 | 4.701 | LINC00536 | non-coding intronic |
| 22 | rs8139020  | 18008737  | q11.21 | C | 0.1184 | 0.0278 | A | 4.415 | 3.56E-02 | 4.701 |           |                     |
| 17 | rs9915405  | 65867276  | q24.3  | G | 0.1184 | 0.0278 | A | 4.415 | 3.56E-02 | 4.701 |           |                     |
| 2  | rs8179874  | 1027731   | p25.3  | G | 0.1429 | 0.0417 | A | 4.37  | 3.66E-02 | 3.833 | SNTG2     | intronic            |
| 19 | rs16027    | 13258560  | p13.2  | A | 0.1447 | 0.0429 | G | 4.363 | 3.67E-02 | 3.779 | CACNA1A   | coding              |

|    |            |           |        |   |        |        |   |       |          |       |             |                      |
|----|------------|-----------|--------|---|--------|--------|---|-------|----------|-------|-------------|----------------------|
| 5  | rs10059139 | 64258718  | q12.3  | C | 0.1842 | 0.0694 | T | 4.352 | 3.70E-02 | 3.026 | CWC27       | intronic             |
| 3  | rs10510230 | 2257130   | p26.3  | C | 0.1842 | 0.0694 | A | 4.352 | 3.70E-02 | 3.026 | CNTN4       | intronic             |
| 1  | rs10911031 | 180440334 | q25.3  | A | 0.1842 | 0.0694 | G | 4.352 | 3.70E-02 | 3.026 | GS1_122H1.2 | non-coding intronic  |
| 9  | rs10970061 | 31020836  | p21.1  | A | 0.1842 | 0.0694 | G | 4.352 | 3.70E-02 | 3.026 |             |                      |
| 8  | rs12155549 | 119255578 | q24.11 | C | 0.1842 | 0.0694 | T | 4.352 | 3.70E-02 | 3.026 |             |                      |
| 15 | rs12440772 | 68091211  | q23    | A | 0.1842 | 0.0694 | G | 4.352 | 3.70E-02 | 3.026 |             |                      |
| 4  | rs1349683  | 124618510 | q28.1  | G | 0.1842 | 0.0694 | A | 4.352 | 3.70E-02 | 3.026 |             |                      |
| 5  | rs16901644 | 31902960  | p13.3  | A | 0.1842 | 0.0694 | G | 4.352 | 3.70E-02 | 3.026 | PDZD2       | intronic             |
| 9  | rs1765372  | 33689373  | p13.3  | A | 0.1842 | 0.0694 | C | 4.352 | 3.70E-02 | 3.026 |             |                      |
| 17 | rs17823987 | 4511439   | p13.2  | C | 0.1842 | 0.0694 | A | 4.352 | 3.70E-02 | 3.026 |             |                      |
| 9  | rs2151414  | 70562820  | q21.11 | G | 0.1842 | 0.0694 | A | 4.352 | 3.70E-02 | 3.026 | PIP5K1B     | non-coding intronic  |
| 12 | rs2293094  | 50602870  | q13.13 | G | 0.1842 | 0.0694 | A | 4.352 | 3.70E-02 | 3.026 | ACVRL1      | 3utr                 |
| 9  | rs2416864  | 124293834 | q33.2  | A | 0.1842 | 0.0694 | G | 4.352 | 3.70E-02 | 3.026 | OR1J2       | intronic             |
| 6  | rs3846814  | 67116910  | q12    | T | 0.1842 | 0.0694 | C | 4.352 | 3.70E-02 | 3.026 |             |                      |
| 4  | rs4561891  | 165388371 | q32.3  | C | 0.1842 | 0.0694 | A | 4.352 | 3.70E-02 | 3.026 | MARCH1      | intronic             |
| 4  | rs4689665  | 7294301   | p16.1  | T | 0.1842 | 0.0694 | C | 4.352 | 3.70E-02 | 3.026 | SORCS2      | intronic             |
| 16 | rs4889428  | 80482495  | q23.3  | T | 0.1842 | 0.0694 | C | 4.352 | 3.70E-02 | 3.026 | PLCG2       | intronic             |
| 20 | rs6045924  | 199494    | p13    | G | 0.1842 | 0.0694 | T | 4.352 | 3.70E-02 | 3.026 | C20orf96    | 3downstream          |
| 6  | rs6927917  | 73214183  | q13    | A | 0.1842 | 0.0694 | G | 4.352 | 3.70E-02 | 3.026 |             |                      |
| 10 | rs7076334  | 25497906  | p12.1  | A | 0.1842 | 0.0694 | G | 4.352 | 3.70E-02 | 3.026 | GPR158-AS1  | intronic             |
| 10 | rs7081721  | 4586561   | p15.1  | A | 0.1842 | 0.0694 | G | 4.352 | 3.70E-02 | 3.026 |             |                      |
| 14 | rs7159883  | 58347513  | q23.1  | A | 0.1842 | 0.0694 | C | 4.352 | 3.70E-02 | 3.026 |             |                      |
| 17 | rs7211876  | 75925955  | q25.3  | T | 0.1842 | 0.0694 | C | 4.352 | 3.70E-02 | 3.026 | RNF213      | intronic/3downstream |
| 14 | rs735148   | 93392382  | q32.12 | T | 0.1842 | 0.0694 | C | 4.352 | 3.70E-02 | 3.026 |             |                      |
| 7  | rs7455906  | 79996797  | q21.11 | T | 0.1842 | 0.0694 | C | 4.352 | 3.70E-02 | 3.026 | CD36        | intronic             |
| 12 | rs7956222  | 99730699  | q23.1  | C | 0.1842 | 0.0694 | T | 4.352 | 3.70E-02 | 3.026 | ANO4        | intronic             |
| 9  | rs855438   | 33693234  | p13.3  | C | 0.1842 | 0.0694 | T | 4.352 | 3.70E-02 | 3.026 |             |                      |
| 3  | rs931317   | 59903891  | p14.2  | G | 0.1842 | 0.0694 | A | 4.352 | 3.70E-02 | 3.026 | FHIT        | intronic             |
| 3  | rs10510621 | 29491643  | p24.1  | A | 0.1622 | 0.0556 | G | 4.25  | 3.92E-02 | 3.29  | RBMS3       | intronic             |
| 11 | rs1942849  | 128037597 | q24.3  | C | 0.1622 | 0.0556 | T | 4.25  | 3.92E-02 | 3.29  |             |                      |
| 2  | rs4467294  | 102724201 | q12.1  | G | 0.1622 | 0.0556 | T | 4.25  | 3.92E-02 | 3.29  | TMEM182     | intronic             |
| 10 | rs7091469  | 52742174  | q21.1  | T | 0.1622 | 0.0556 | C | 4.25  | 3.92E-02 | 3.29  | PRKG1       | intronic             |
| 23 | rs2106831  | 9137044   | p22.31 | T | 0.2500 | 0.0943 | C | 4.229 | 3.97E-02 | 3.2   |             |                      |
| 15 | rs3812920  | 20419703  | q11.2  | T | 0.1184 | 0.0286 | C | 4.223 | 3.99E-02 | 4.567 | TUBGCP5     | intronic             |
| 18 | rs9807656  | 40600954  | q12.3  | C | 0.1184 | 0.0286 | T | 4.223 | 3.99E-02 | 4.567 | SETBP1      | intronic             |
| 12 | rs12371626 | 65102768  | q14.3  | T | 0.1389 | 0.0417 | C | 4.143 | 4.18E-02 | 3.71  | GRIP1       | intronic             |
| 14 | rs1168414  | 37817897  | q21.1  | A | 0.1143 | 0.0278 | G | 4.057 | 4.40E-02 | 4.516 |             |                      |
| 3  | rs1546038  | 79518922  | p12.3  | T | 0.1143 | 0.0278 | C | 4.057 | 4.40E-02 | 4.516 | ROBO1       | intronic             |
| 8  | rs2440445  | 6330927   | p23.1  | G | 0.1143 | 0.0278 | A | 4.057 | 4.40E-02 | 4.516 | MCPH1       | intronic             |
| 16 | rs8063568  | 17646047  | p12.3  | A | 0.1143 | 0.0278 | C | 4.057 | 4.40E-02 | 4.516 |             |                      |
| 4  | rs2178095  | 185846784 | q35.1  | A | 0.1184 | 0.0294 | G | 4.03  | 4.47E-02 | 4.433 | CCDC111     | intronic             |
| 8  | rs11136072 | 29400345  | p12    | G | 0.1579 | 0.0556 | A | 4.016 | 4.51E-02 | 3.188 |             |                      |
| 6  | rs11153496 | 115112039 | q22.1  | A | 0.1579 | 0.0556 | G | 4.016 | 4.51E-02 | 3.188 |             |                      |
| 10 | rs11592670 | 114074341 | q25.2  | A | 0.1579 | 0.0556 | C | 4.016 | 4.51E-02 | 3.188 | GUCY2GP     | non-coding intronic  |
| 10 | rs11815261 | 33778050  | p11.22 | G | 0.1579 | 0.0556 | T | 4.016 | 4.51E-02 | 3.188 |             |                      |
| 15 | rs11853146 | 48195316  | q21.2  | T | 0.1579 | 0.0556 | C | 4.016 | 4.51E-02 | 3.188 | ATP8B4      | intronic             |
| 3  | rs11915214 | 54616060  | p14.3  | A | 0.1579 | 0.0556 | G | 4.016 | 4.51E-02 | 3.188 | CACNA2D3    | intronic             |
| 5  | rs11958845 | 170208539 | q35.1  | A | 0.1579 | 0.0556 | G | 4.016 | 4.51E-02 | 3.188 |             |                      |
| 1  | rs12128858 | 34496515  | p34.3  | C | 0.1579 | 0.0556 | T | 4.016 | 4.51E-02 | 3.188 |             |                      |
| 12 | rs12318442 | 20637274  | p12.2  | T | 0.1579 | 0.0556 | C | 4.016 | 4.51E-02 | 3.188 | PDE3A       | intronic             |
| 18 | rs12606713 | 48433842  | q21.2  | G | 0.1579 | 0.0556 | A | 4.016 | 4.51E-02 | 3.188 | DCC         | intronic             |
| 4  | rs12643033 | 170000887 | q32.3  | G | 0.1579 | 0.0556 | T | 4.016 | 4.51E-02 | 3.188 | PALLD       | intronic             |
| 5  | rs12659543 | 71173487  | q13.2  | A | 0.1579 | 0.0556 | G | 4.016 | 4.51E-02 | 3.188 |             |                      |
| 10 | rs12776250 | 11423030  | p14    | C | 0.1579 | 0.0556 | T | 4.016 | 4.51E-02 | 3.188 |             |                      |
| 5  | rs13161696 | 66046930  | q12.3  | A | 0.1579 | 0.0556 | C | 4.016 | 4.51E-02 | 3.188 | MAST4       | intronic             |
| 4  | rs1518000  | 18398373  | p15.31 | G | 0.1579 | 0.0556 | T | 4.016 | 4.51E-02 | 3.188 |             |                      |
| 15 | rs16975846 | 94280228  | q26.2  | C | 0.1579 | 0.0556 | T | 4.016 | 4.51E-02 | 3.188 |             |                      |
| 4  | rs17005729 | 141450708 | q31.1  | T | 0.1579 | 0.0556 | C | 4.016 | 4.51E-02 | 3.188 | SCOC        | intronic             |
| 3  | rs17049174 | 8484497   | p26.1  | A | 0.1579 | 0.0556 | G | 4.016 | 4.51E-02 | 3.188 | LMCD1-AS1   | non-coding intronic  |
| 12 | rs17104186 | 66320139  | q15    | C | 0.1579 | 0.0556 | T | 4.016 | 4.51E-02 | 3.188 |             |                      |
| 7  | rs17141124 | 19320105  | p21.1  | T | 0.1579 | 0.0556 | G | 4.016 | 4.51E-02 | 3.188 |             |                      |
| 9  | rs17583891 | 137436405 | q34.3  | A | 0.1579 | 0.0556 | G | 4.016 | 4.51E-02 | 3.188 |             |                      |
| 5  | rs17794637 | 11358217  | p15.2  | T | 0.1579 | 0.0556 | C | 4.016 | 4.51E-02 | 3.188 | CTNND2      | intronic             |
| 14 | rs17799268 | 89858687  | q32.11 | A | 0.1579 | 0.0556 | C | 4.016 | 4.51E-02 | 3.188 | NRDE2       | intronic             |
| 5  | rs2162804  | 63660182  | q12.3  | A | 0.1579 | 0.0556 | G | 4.016 | 4.51E-02 | 3.188 | RNF180      | intronic             |
| 5  | rs2216588  | 170214294 | q35.1  | G | 0.1579 | 0.0556 | T | 4.016 | 4.51E-02 | 3.188 |             |                      |
| 7  | rs2390081  | 19326307  | p21.1  | G | 0.1579 | 0.0556 | A | 4.016 | 4.51E-02 | 3.188 |             |                      |
| 6  | rs2397008  | 50616436  | p12.3  | C | 0.1579 | 0.0556 | A | 4.016 | 4.51E-02 | 3.188 |             |                      |
| 9  | rs2809845  | 82966078  | q21.31 | A | 0.1579 | 0.0556 | C | 4.016 | 4.51E-02 | 3.188 |             |                      |
| 10 | rs2812562  | 70980738  | q22.1  | C | 0.1579 | 0.0556 | T | 4.016 | 4.51E-02 | 3.188 |             |                      |
| 3  | rs2863836  | 167943645 | q26.1  | G | 0.1579 | 0.0556 | A | 4.016 | 4.51E-02 | 3.188 |             |                      |
| 4  | rs4048413  | 174253216 | q34.1  | A | 0.1579 | 0.0556 | G | 4.016 | 4.51E-02 | 3.188 |             |                      |
| 6  | rs4074101  | 56670411  | p12.1  | T | 0.1579 | 0.0556 | C | 4.016 | 4.51E-02 | 3.188 | DST         | intronic             |

|    |            |           |        |   |        |        |   |       |          |       |                  |                     |
|----|------------|-----------|--------|---|--------|--------|---|-------|----------|-------|------------------|---------------------|
| 15 | rs4238465  | 91527661  | q26.1  | A | 0.1579 | 0.0556 | G | 4.016 | 4.51E-02 | 3.188 |                  |                     |
| 4  | rs4697300  | 22058901  | p15.2  | G | 0.1579 | 0.0556 | T | 4.016 | 4.51E-02 | 3.188 | GPR125           | intronic            |
| 7  | rs4725033  | 7820533   | p21.3  | C | 0.1579 | 0.0556 | T | 4.016 | 4.51E-02 | 3.188 | LOC729852        | intronic            |
| 14 | rs4906523  | 43864397  | q21.2  | G | 0.1579 | 0.0556 | A | 4.016 | 4.51E-02 | 3.188 |                  |                     |
| 22 | rs5750283  | 35424439  | q12.3  | G | 0.1579 | 0.0556 | A | 4.016 | 4.51E-02 | 3.188 | CACNG2           | intronic            |
| 8  | rs6474057  | 57372209  | q12.1  | C | 0.1579 | 0.0556 | T | 4.016 | 4.51E-02 | 3.188 |                  |                     |
| 15 | rs6493395  | 48131276  | q21.2  | T | 0.1579 | 0.0556 | C | 4.016 | 4.51E-02 | 3.188 | ATP8B4           | intronic            |
| 2  | rs6548077  | 2697985   | p25.3  | A | 0.1579 | 0.0556 | C | 4.016 | 4.51E-02 | 3.188 |                  |                     |
| 10 | rs6585021  | 112640045 | q25.2  | T | 0.1579 | 0.0556 | C | 4.016 | 4.51E-02 | 3.188 | PDCD4            | intronic            |
| 10 | rs6585023  | 112658371 | q25.2  | A | 0.1579 | 0.0556 | G | 4.016 | 4.51E-02 | 3.188 | BBIP1            | intronic            |
| 8  | rs6985430  | 75884685  | q21.11 | G | 0.1579 | 0.0556 | A | 4.016 | 4.51E-02 | 3.188 |                  |                     |
| 17 | rs7222964  | 57081718  | q23.2  | C | 0.1579 | 0.0556 | T | 4.016 | 4.51E-02 | 3.188 |                  |                     |
| 21 | rs7277065  | 43969714  | q22.3  | T | 0.1579 | 0.0556 | C | 4.016 | 4.51E-02 | 3.188 | PDXK             | intronic            |
| 4  | rs7693445  | 174252199 | q34.1  | T | 0.1579 | 0.0556 | C | 4.016 | 4.51E-02 | 3.188 |                  |                     |
| 8  | rs7842758  | 75870217  | q21.11 | G | 0.1579 | 0.0556 | A | 4.016 | 4.51E-02 | 3.188 |                  |                     |
| 6  | rs9349160  | 40708620  | p21.1  | A | 0.1579 | 0.0556 | G | 4.016 | 4.51E-02 | 3.188 |                  |                     |
| 22 | rs9615753  | 46857005  | q13.32 | T | 0.1579 | 0.0556 | C | 4.016 | 4.51E-02 | 3.188 |                  |                     |
| 5  | rs9687338  | 19237824  | p14.3  | A | 0.1579 | 0.0556 | G | 4.016 | 4.51E-02 | 3.188 |                  |                     |
| 3  | rs9849092  | 101293099 | q12.1  | A | 0.1579 | 0.0556 | G | 4.016 | 4.51E-02 | 3.188 | CMSS1/FLIP1L     | intronic            |
| 16 | rs12103381 | 62341057  | q21    | C | 0.1429 | 0.0441 | T | 3.941 | 4.71E-02 | 3.611 |                  |                     |
| 17 | rs12948783 | 72010995  | q25.1  | A | 0.1351 | 0.0417 | G | 3.931 | 4.74E-02 | 3.594 | RHBDF2           | Supstream           |
| 2  | rs2037814  | 73529177  | p13.1  | A | 0.1351 | 0.0417 | C | 3.931 | 4.74E-02 | 3.594 | ALMS1            | coding              |
| 13 | rs7318721  | 23318440  | q12.12 | A | 0.1351 | 0.0417 | C | 3.931 | 4.74E-02 | 3.594 | MIPEP            | intronic            |
| 13 | rs12871083 | 86458485  | q31.1  | C | 0.0857 | 0.0139 | T | 3.907 | 4.81E-02 | 6.656 |                  |                     |
| 13 | rs3847988  | 29401277  | q12.3  | G | 0.0857 | 0.0139 | T | 3.907 | 4.81E-02 | 6.656 |                  |                     |
| 6  | rs12204791 | 3345768   | p25.2  | C | 0.1571 | 0.0556 | T | 3.877 | 4.90E-02 | 3.169 | SLC22A23         | non-coding intronic |
| 3  | rs12489048 | 115258840 | q13.31 | G | 0.1571 | 0.0556 | A | 3.877 | 4.90E-02 | 3.169 | KIAA1407/QRTRTD1 | Supstream/intronic  |
