# Supplementary material for: ASD Phenotype—Genotype Associations in Concordant and Discordant Monozygotic and Dizygotic Twins Stratified by Severity of Autistic Traits
Source: MDPI journal article supplement (doi:10.3390/ijms20153804), 2019-08-03
Supplement: s1 [file s1]

| All trait QTNs for dA.MZ twins |            |           |          |        |          |                     |             |           |
|--------------------------------|------------|-----------|----------|--------|----------|---------------------|-------------|-----------|
| <b>Language</b>                |            |           |          |        |          |                     |             |           |
| CHR                            | SNP        | BP        | P        | Band   | Genes    | Role                | aa Position | aa Change |
| 7                              | rs10275192 | 85436760  | 6.10E-08 | q21.11 |          |                     |             |           |
| 16                             | rs11076384 | 59070568  | 6.10E-08 | q21    |          |                     |             |           |
| 16                             | rs16962092 | 59068132  | 6.10E-08 | q21    |          |                     |             |           |
| 9                              | rs2809445  | 127988530 | 6.10E-08 | q33.3  |          |                     |             |           |
| 7                              | rs7785694  | 85431498  | 6.10E-08 | q21.11 |          |                     |             |           |
| 1                              | rs2774285  | 114443208 | 1.11E-06 | p13.2  | SYT6     | intronic            |             |           |
| 13                             | rs9594670  | 41529489  | 3.30E-06 | q14.11 | DGKH     | intronic            |             |           |
| 11                             | rs1809063  | 131636242 | 7.55E-06 | q25    | NTM      | intronic            |             |           |
| 17                             | rs756785   | 27836958  | 8.43E-06 | q11.2  | CDK5R1   | 5upstream           |             |           |
| <b>Nonverbal</b>               |            |           |          |        |          |                     |             |           |
| CHR                            | SNP        | BP        | P        | Band   | Genes    | Role                | aa Position | aa Change |
| 10                             | rs1836470  | 45099325  | 2.03E-06 | q11.21 |          |                     |             |           |
| 17                             | rs11080180 | 27707111  | 3.11E-06 | q11.2  | ZNF207   | intronic            |             |           |
| 7                              | rs6462639  | 36019937  | 7.48E-06 | p14.2  |          |                     |             |           |
| <b>Play</b>                    |            |           |          |        |          |                     |             |           |
| CHR                            | SNP        | BP        | P        | Band   | Genes    | Role                | aa Position | aa Change |
| 18                             | rs8088744  | 64685792  | 7.23E-06 | q22.1  | CCDC102B | intronic            |             |           |
| 2                              | rs355810   | 165393892 | 9.63E-06 | q24.3  | COBLL1   | intronic            |             |           |
| <b>Social</b>                  |            |           |          |        |          |                     |             |           |
| CHR                            | SNP        | BP        | P        | Band   | Genes    | Role                | aa Position | aa Change |
| 19                             | rs3826861  | 50748460  | 2.20E-06 | p12.2  | OPA3     | 3utr                |             |           |
| 19                             | rs1264226  | 50755007  | 2.47E-06 | p13.2  | OPA3     | intronic            |             |           |
| 4                              | rs11723176 | 187648291 | 2.55E-06 | p13.2  | F11_AS1  | non-coding intronic |             |           |
| 3                              | rs4856450  | 83388138  | 5.52E-06 | q35.2  |          |                     |             |           |
| 1                              | rs11102627 | 113761409 | 6.60E-06 | q13.32 | MAGI3    | intronic            |             |           |

|                                |             |           |          |        |        |          |             |           |
|--------------------------------|-------------|-----------|----------|--------|--------|----------|-------------|-----------|
| 1                              | rs111102647 | 113872742 | 6.60E-06 | q26.3  | MAGI3  | intronic |             |           |
| 10                             | rs521331    | 8264856   | 6.60E-06 | q14.1  |        |          |             |           |
| 10                             | rs7070581   | 126159363 | 6.60E-06 | q13.32 | LHPP   | intronic |             |           |
| 12                             | rs10505863  | 20228698  | 7.94E-06 | p12.2  |        |          |             |           |
| 23                             | rs5962427   | 103575337 | 8.99E-06 | p14    |        |          |             |           |
| 23                             | rs2097402   | 133945220 | 9.05E-06 | q22.2  |        |          |             |           |
| 5                              | rs2287672   | 79125284  | 9.29E-06 | q26.13 | CMYA5  | intronic |             |           |
|                                |             |           |          |        |        |          |             |           |
| <b>Perseverative Behaviors</b> |             |           |          |        |        |          |             |           |
| CHR                            | SNP         | BP        | P        | Band   | Genes  | Role     | aa Position | aa Change |
| 15                             | rs10518761  | 52322448  | 1.37E-06 | q21.3  | UNC13C | intronic |             |           |
