# Supplementary material for: ASD Phenotype—Genotype Associations in Concordant and Discordant Monozygotic and Dizygotic Twins Stratified by Severity of Autistic Traits
Source: MDPI journal article supplement (doi:10.3390/ijms20153804), 2019-08-03
Supplement: s1 [file s1]

Table S15. ADI-R items used for quantitative trait severity profiles\*

| <b>Language</b> | <b>Nonverbal communication</b> | <b>Perseverative behavior</b> | <b>Play skills</b> | <b>Social interactions</b> |
|-----------------|--------------------------------|-------------------------------|--------------------|----------------------------|
| CARTIC          | CCOMPSL                        | CUNPROC                       | CPLAY              | GAZE5                      |
| ARTICF5         | COMPSL5                        | EUNPROC                       | PLAY5              | CSSMILE                    |
| CSTEREO         | CUSEBOD                        | CCIRINT                       | CPEERPL            | SSMILE5                    |
| ESTEREO         | EUSEBOD                        | ECIRINT                       | PEERPL5            | CSHOW                      |
| CCHAT           | CPOINT                         | CUSEOBJ                       | CSOPLAY            | SHOW5                      |
| CHAT5           | POINT5                         | EUSEOBJ                       | SOPLAY5            | COSHARE                    |
| CCONVER         | CNOD                           | CCRIT                         | CINTCH             | OSHARE5                    |
| CONVER5         | NOD5                           | ECRIT                         | INTCH5             | CSHARE                     |
| CINAPPQ         | CHSHAKE                        | CUNSENS                       | CRESPCH            | SHARE5                     |
| EINAPPQ         | HSHAKE5                        | EUNSENS                       | RESPCH5            | COCOMF                     |
| CPRON           | CINSGES                        | CCHANGE                       | CGRPLAY            | OCOMF5                     |
| EPRON           | INSGES5                        | ECHANGE                       | GRPLAY5            | CQUALOV                    |
| CNEOID          | AVOICE5                        | CRESIS                        | CFRIEND            | QUALOV5                    |
| ENEOID          | CIMIT                          | ERESIS                        | FREND15            | CRFACEX                    |
| CVERRIT         | IMIT5                          | CUATT                         |                    | RFACEX5                    |
| EVERRIT         |                                | EUATT                         |                    | CINAPFE                    |
| CINR            |                                |                               |                    | EINAPFE                    |
| EINR            |                                |                               |                    | CQRESP                     |
| CSPEECH         |                                |                               |                    | QRESP5                     |
| SPEECH5         |                                |                               |                    | CINITIA                    |
|                 |                                |                               |                    | INITIA5                    |
|                 |                                |                               |                    | CSOCDIS                    |
|                 |                                |                               |                    | SOCDIS5                    |

\*From Hu and Steinberg [17]
