# Supplementary material for: ASD Phenotype—Genotype Associations in Concordant and Discordant Monozygotic and Dizygotic Twins Stratified by Severity of Autistic Traits
Source: MDPI journal article supplement (doi:10.3390/ijms20153804), 2019-08-03
Supplement: s1 [file s1]

| Summary of case-control by quartile analysis of dA.DZ twins |     |            |           |    |       |       |    |       |        |          |          |          |          |         |           |                              |
|-------------------------------------------------------------|-----|------------|-----------|----|-------|-------|----|-------|--------|----------|----------|----------|----------|---------|-----------|------------------------------|
| Language                                                    |     |            |           |    |       |       |    |       |        |          |          |          |          |         |           |                              |
| Q1 (N = 12)                                                 | CHR | SNP        | BP        | A1 | F_A   | F_U   | A2 | CHISQ | OR     | UNADJ    | BONF     | FDR_BH   | Band     | Alleles | Gene      | Role                         |
|                                                             | 12  | rs249047   | 112562237 | G  | 0.083 | 0.422 | A  | 11.26 | 0.1243 | 7.90E-04 | 2.37E-03 | 2.37E-03 | 12q24.13 |         |           |                              |
|                                                             | 15  | rs1823718  | 71934297  | C  | 0.708 | 0.470 | T  | 5.453 | 2.74   | 1.95E-02 | 5.86E-02 | 2.93E-02 | 15q24.1  |         |           |                              |
|                                                             | 1   | rs17587765 | 117372602 | T  | 0.042 | 0.185 | G  | 3.266 | 0.1915 | 7.07E-02 | 2.12E-01 | 7.07E-02 | 1p13.1   | G/T     | CD101     | intronic                     |
| Q4 (N = 12)                                                 | CHR | SNP        | BP        | A1 | F_A   | F_U   | A2 | CHISQ | OR     | UNADJ    | BONF     | FDR_BH   | Band     | Alleles | Gene      | Role                         |
|                                                             | 1   | rs17587765 | 117372602 | T  | 0.542 | 0.185 | G  | 19.99 | 5.204  | 7.78E-06 | 2.33E-05 | 2.33E-05 | 1p13.1   | G/T     | CD101     | intronic                     |
|                                                             | 15  | rs1823718  | 71934297  | C  | 0.125 | 0.470 | T  | 11.41 | 0.1612 | 7.32E-04 | 2.20E-03 | 1.10E-03 | 15q24.1  |         |           |                              |
|                                                             | 12  | rs249047   | 112562237 | G  | 0.625 | 0.422 | A  | 4.016 | 2.279  | 4.51E-02 | 1.35E-01 | 4.51E-02 | 12q24.13 |         |           |                              |
| Nonverbal                                                   |     |            |           |    |       |       |    |       |        |          |          |          |          |         |           |                              |
| Q1 (N = 11)                                                 | CHR | SNP        | BP        | A1 | F_A   | F_U   | A2 | CHISQ | OR     | UNADJ    | BONF     | FDR_BH   | Band     | Alleles | Gene      | Role                         |
|                                                             | 6   | rs6923735  | 3362642   | A  | 0.136 | 0.402 | G  | 6.446 | 0.2346 | 1.11E-02 | 4.45E-02 | 1.58E-02 | 6p25.2   | G A     | SLC22A23  | intronic                     |
|                                                             | 11  | rs2953310  | 40094119  | C  | 0.182 | 0.450 | T  | 6.355 | 0.2719 | 1.17E-02 | 4.68E-02 | 1.58E-02 | 11p12    | T C     | LRRC4C    | coding                       |
|                                                             | 6   | rs807302   | 119968450 | C  | 0.000 | 0.221 | A  | 6.221 | 0      | 1.26E-02 | 5.05E-02 | 1.58E-02 | 6q22.31  |         |           |                              |
| Q4 (N = 13)                                                 | CHR | SNP        | BP        | A1 | F_A   | F_U   | A2 | CHISQ | OR     | UNADJ    | BONF     | FDR_BH   | Band     | Alleles | Gene      | Role                         |
|                                                             | 6   | rs6923735  | 3362642   | A  | 0.692 | 0.402 | G  | 9.037 | 3.343  | 2.65E-03 | 1.06E-02 | 8.16E-03 | 6p25.2   | G A     | SLC22A23  | intronic                     |
|                                                             | 11  | rs2953310  | 40094119  | C  | 0.731 | 0.450 | T  | 8.249 | 3.321  | 4.08E-03 | 1.63E-02 | 8.16E-03 | 11p12    | T C     | LRRC4C    | coding                       |
|                                                             | 3   | rs7613095  | 194294915 | G  | 0.500 | 0.276 | A  | 6.489 | 2.626  | 1.09E-02 | 4.34E-02 | 1.45E-02 | 3q29     |         |           |                              |
| Play                                                        |     |            |           |    |       |       |    |       |        |          |          |          |          |         |           |                              |
| Q4 (N = 9)                                                  | CHR | SNP        | BP        | A1 | F_A   | F_U   | A2 | CHISQ | OR     | UNADJ    | BONF     | FDR_BH   | Band     | Alleles | Gene      | Role                         |
|                                                             | 12  | rs17483048 | 118415784 | G  | 0.556 | 0.096 | A  | 42.72 | 11.71  | 6.32E-11 | 3.16E-10 | 3.16E-10 | 12q24.23 | A G     | CCDC60/A  | non-coding intronic          |
|                                                             | 3   | rs1563981  | 28722162  | C  | 0.375 | 0.107 | A  | 11.86 | 4.998  | 5.74E-04 | 2.87E-03 | 1.43E-03 | 3p24.1   | T G     | LINC00693 | non-coding intronic          |
|                                                             | 10  | rs17692734 | 54841584  | C  | 0.444 | 0.164 | T  | 10.29 | 4.093  | 1.33E-03 | 6.67E-03 | 2.22E-03 | 10q21.1  |         |           |                              |
|                                                             | 10  | rs2133470  | 54807327  | G  | 0.389 | 0.138 | A  | 9.508 | 3.993  | 2.05E-03 | 1.02E-02 | 2.56E-03 | 10q21.1  |         |           |                              |
|                                                             | 16  | rs17772954 | 76243191  | A  | 0.389 | 0.165 | G  | 6.546 | 3.233  | 1.05E-02 | 5.26E-02 | 1.05E-02 | 16q23.1  |         |           |                              |
| Social                                                      |     |            |           |    |       |       |    |       |        |          |          |          |          |         |           |                              |
| Q1 (N = 9)                                                  | CHR | SNP        | BP        | A1 | F_A   | F_U   | A2 | CHISQ | OR     | UNADJ    | BONF     | FDR_BH   | Band     | Alleles | Gene      | Role                         |
|                                                             | 11  | rs2953310  | 40094119  | C  | 0.167 | 0.450 | T  | 5.809 | 0.2447 | 1.59E-02 | 3.19E-02 | 2.49E-02 | 11p12    | T/C     | LRRC4C    | coding                       |
|                                                             | 14  | rs12894797 | 79861843  | T  | 0.722 | 0.458 | C  | 5.029 | 3.073  | 2.49E-02 | 4.99E-02 | 2.49E-02 | 14q31.1  | C/T     | DIO2-AS1  |                              |
| Q4 (N = 12)                                                 | CHR | SNP        | BP        | A1 | F_A   | F_U   | A2 | CHISQ | OR     | UNADJ    | BONF     | FDR_BH   | Band     | Alleles | Gene      | Role                         |
|                                                             | 11  | rs2953310  | 40094119  | C  | 0.750 | 0.450 | T  | 8.696 | 3.671  | 3.19E-03 | 6.38E-03 | 6.38E-03 | 11p12    | T/C     | LRRC4C    | coding                       |
|                                                             | 14  | rs12894797 | 79861843  | T  | 0.250 | 0.458 | C  | 4.177 | 0.3939 | 4.10E-02 | 8.20E-02 | 4.10E-02 | 14q31.1  | C/T     | DIO2-AS1  |                              |
| Perseverative Behaviors                                     |     |            |           |    |       |       |    |       |        |          |          |          |          |         |           |                              |
| Q1 (N = 19)                                                 | CHR | SNP        | BP        | A1 | F_A   | F_U   | A2 | CHISQ | OR     | UNADJ    | BONF     | FDR_BH   | Band     | Alleles | Gene      | Role                         |
|                                                             | 6   | rs6454752  | 90075080  | T  | 0.053 | 0.237 | C  | 7.124 | 0.1787 | 7.61E-03 | 5.33E-02 | 2.24E-02 | 6q15     | C/T     | GABRR2    | intronic                     |
|                                                             | 10  | rs12570126 | 75086795  | G  | 0.026 | 0.196 | A  | 6.919 | 0.1109 | 8.53E-03 | 5.97E-02 | 2.24E-02 | 10q22.2  | A G     | SYNPO2L   | Supstream/noncoding intronic |
|                                                             | 17  | rs1010045  | 67801683  | T  | 0.000 | 0.150 | C  | 6.712 | 0      | 9.58E-03 | 6.70E-02 | 2.24E-02 | 17q24.3  |         |           |                              |
|                                                             | 10  | rs11818084 | 125976888 | A  | 0.132 | 0.286 | G  | 4.41  | 0.3784 | 3.57E-02 | 2.50E-01 | 6.25E-02 | 10q26.13 |         |           |                              |
| Q4 (N = 6)                                                  | CHR | SNP        | BP        | A1 | F_A   | F_U   | A2 | CHISQ | OR     | UNADJ    | BONF     | FDR_BH   | Band     | Alleles | Gene      | Role                         |
|                                                             | 18  | rs8084650  | 36009793  | G  | 0.417 | 0.045 | A  | 38.22 | 15.33  | 6.31E-10 | 4.42E-09 | 4.42E-09 | 18q12.3  |         |           |                              |
|                                                             | 11  | rs11219808 | 124225108 | T  | 0.417 | 0.067 | C  | 23.1  | 9.934  | 1.54E-06 | 1.08E-05 | 5.38E-06 | 11q24.2  |         |           |                              |
|                                                             | 10  | rs12570126 | 75086795  | G  | 0.583 | 0.196 | A  | 11.37 | 5.747  | 7.48E-04 | 5.24E-03 | 1.75E-03 | 10q22.2  | A G     | SYNPO2L   | Supstream/noncoding intronic |
|                                                             | 3   | rs2679593  | 157706326 | G  | 0.000 | 0.494 | A  | 9.725 | 0      | 1.82E-03 | 1.27E-02 | 3.18E-03 |          |         |           |                              |
|                                                             | 10  | rs11818084 | 125976888 | A  | 0.667 | 0.286 | G  | 8.483 | 4.995  | 3.59E-03 | 2.51E-02 | 5.02E-03 | 10q26.13 |         |           |                              |
|                                                             | 17  | rs1010045  | 67801683  | T  | 0.417 | 0.150 | C  | 6.628 | 4.038  | 1.00E-02 | 7.03E-02 | 1.17E-02 | 17q24.3  |         |           |                              |
|                                                             | 6   | rs6454752  | 90075080  | T  | 0.500 | 0.237 | C  | 4.565 | 3.217  | 3.26E-02 | 2.29E-01 | 3.26E-02 | 6q15     | C/T     | GABRR2    | intronic                     |
