# Supplementary material for: ASD Phenotype—Genotype Associations in Concordant and Discordant Monozygotic and Dizygotic Twins Stratified by Severity of Autistic Traits
Source: MDPI journal article supplement (doi:10.3390/ijms20153804), 2019-08-03
Supplement: s1 [file s1]

| Summary of case-control by quartile analysis of dNA.DZ twins |     |            |           |    |     |       |       |       |       |        |          |          |          |         |         |               |                      |
|--------------------------------------------------------------|-----|------------|-----------|----|-----|-------|-------|-------|-------|--------|----------|----------|----------|---------|---------|---------------|----------------------|
| Language                                                     |     |            |           |    |     |       |       |       |       |        |          |          |          |         |         |               |                      |
| Q4 (N = 17)                                                  | CHR | SNP        | BP        | A1 | F_A | F_U   | A2    | CHISQ | OR    | UNADJ  | BONF     | FDR_BH   | Band     | Alleles | Gene(s) | Role          |                      |
|                                                              | 8   | rs17595454 | 18377451  | T  |     | 0.281 | 0.081 | C     | 16.8  | 4.429  | 4.16E-05 | 3.70E-03 | 3.70E-03 | p22     | C T     |               |                      |
| Nonverbal                                                    |     |            |           |    |     |       |       |       |       |        |          |          |          |         |         |               |                      |
| Q4 (N = 15)                                                  | CHR | SNP        | BP        | A1 | F_A | F_U   | A2    | CHISQ | OR    | UNADJ  | BONF     | FDR_BH   | Band     | Alleles | Gene(s) | Role          |                      |
|                                                              | 3   | rs17564921 | 148372345 | C  |     | 0.233 | 0.069 | A     | 12.39 | 4.111  | 4.32E-04 | 3.93E-02 | 1.81E-02 | q24     | A C     | RP11-649A     | intronic             |
|                                                              | 5   | rs17211823 | 128158012 | C  |     | 0.233 | 0.069 | T     | 12.31 | 4.096  | 4.49E-04 | 4.09E-02 | 1.81E-02 | q23.3   | T C     | SLC27A6       | intronic             |
|                                                              | 7   | rs4719155  | 70745160  | A  |     | 0.533 | 0.258 | G     | 11.78 | 3.29   | 5.99E-04 | 5.45E-02 | 1.81E-02 | q11.22  | A G     | WBSCR17       | intronic             |
|                                                              | 22  | rs6005657  | 26565087  | T  |     | 0.333 | 0.128 | C     | 11.25 | 3.42   | 7.97E-04 | 7.25E-02 | 1.81E-02 | q12.1   |         |               |                      |
|                                                              | 9   | rs6479471  | 95084239  | T  |     | 0.300 | 0.114 | G     | 10.04 | 3.316  | 1.53E-03 | 1.39E-01 | 2.75E-02 | q22.31  | G T     | WNK2          | intronic             |
|                                                              | 4   | rs2342654  | 156369261 | T  |     | 0.333 | 0.141 | C     | 9.086 | 3.053  | 2.58E-03 | 2.34E-01 | 2.75E-02 | q32.1   |         |               |                      |
|                                                              | 9   | rs7022051  | 95042804  | T  |     | 0.300 | 0.120 | C     | 9.073 | 3.142  | 2.59E-03 | 2.36E-01 | 2.75E-02 | q22.31  | C T     | WNK2          | intronic             |
|                                                              | 9   | rs7857220  | 95064873  | C  |     | 0.300 | 0.120 | T     | 9.068 | 3.141  | 2.60E-03 | 2.37E-01 | 2.75E-02 | q22.31  | T C     | WNK2          | intronic (Supstream) |
|                                                              | 18  | rs8084568  | 57190720  | T  |     | 0.233 | 0.082 | C     | 8.988 | 3.409  | 2.72E-03 | 2.47E-01 | 2.75E-02 | q21.33  | C T     | CDH20         | intronic             |
|                                                              | 7   | rs10224816 | 9678184   | C  |     | 0.267 | 0.106 | T     | 8.147 | 3.085  | 4.31E-03 | 3.93E-01 | 3.93E-02 | p21.3   |         |               |                      |
|                                                              | 10  | rs497204   | 80306297  | A  |     | 0.167 | 0.052 | G     | 7.935 | 3.668  | 4.85E-03 | 4.41E-01 | 4.01E-02 | q22.3   |         |               |                      |
|                                                              | 10  | rs772822   | 80304750  | C  |     | 0.133 | 0.037 | T     | 7.606 | 3.991  | 5.82E-03 | 5.29E-01 | 4.41E-02 | q22.3   |         |               |                      |
|                                                              | 17  | rs4387653  | 68659971  | T  |     | 0.367 | 0.177 | C     | 7.291 | 2.686  | 6.93E-03 | 6.31E-01 | 4.85E-02 | q25.1   |         |               |                      |
|                                                              | 20  | rs17805193 | 59138980  | T  |     | 0.167 | 0.055 | C     | 6.996 | 3.416  | 8.17E-03 | 7.43E-01 | 5.31E-02 | q13.33  |         |               |                      |
|                                                              | 8   | rs11984453 | 4491939   | A  |     | 0.200 | 0.079 | G     | 5.969 | 2.92   | 1.46E-02 | 1.00E+00 | 8.83E-02 | p23.2   | G A     | CSMD1         | intronic             |
| Play                                                         |     |            |           |    |     |       |       |       |       |        |          |          |          |         |         |               |                      |
| Q4 (N = 16)                                                  | CHR | SNP        | BP        | A1 | F_A | F_U   | A2    | CHISQ | OR    | UNADJ  | BONF     | FDR_BH   | Band     | Alleles | Gene(s) | Role          |                      |
|                                                              | 20  | rs2427386  | 60794328  | T  |     | 0.625 | 0.346 | C     | 10.92 | 3.151  | 9.53E-04 | 1.67E-01 | 9.03E-02 | q13.33  |         |               |                      |
|                                                              | 16  | rs1801255  | 56247306  | C  |     | 0.469 | 0.229 | A     | 10.28 | 2.968  | 1.35E-03 | 2.35E-01 | 9.03E-02 | q21     | A C     | GPR56         | coding               |
|                                                              | 6   | rs853884   | 36576111  | T  |     | 0.219 | 0.073 | C     | 9.949 | 3.574  | 1.61E-03 | 2.82E-01 | 9.03E-02 | p21.31  | A G     | STK38         | intronic             |
|                                                              | 1   | rs2255340  | 230002773 | A  |     | 0.469 | 0.243 | G     | 8.738 | 2.744  | 3.12E-03 | 5.45E-01 | 9.03E-02 | q42.2   | T C     | DISC1         | intronic             |
|                                                              | 13  | rs2876807  | 61019136  | G  |     | 0.188 | 0.062 | A     | 8.576 | 3.508  | 3.41E-03 | 5.96E-01 | 9.03E-02 | q21.2   |         |               |                      |
|                                                              | 2   | rs10490706 | 19355330  | C  |     | 0.406 | 0.199 | T     | 8.512 | 2.752  | 3.53E-03 | 6.17E-01 | 9.03E-02 | p24.1   | T C     | AC092594      | intronic             |
|                                                              | 8   | rs11984453 | 4491939   | A  |     | 0.219 | 0.079 | G     | 8.47  | 3.27   | 3.61E-03 | 6.32E-01 | 9.03E-02 | p23.2   | G A     | CSMD1         | intronic             |
|                                                              | 2   | rs11690021 | 239301967 | C  |     | 0.219 | 0.080 | T     | 8.191 | 3.212  | 4.21E-03 | 7.37E-01 | 9.21E-02 | q37.3   | T C     | AC113618      | intronic             |
| Perseverative Behaviors                                      |     |            |           |    |     |       |       |       |       |        |          |          |          |         |         |               |                      |
| Q1 (N = 20)                                                  | CHR | SNP        | BP        | A1 | F_A | F_U   | A2    | CHISQ | OR    | UNADJ  | BONF     | FDR_BH   | Band     | Alleles | Gene(s) | Role          |                      |
|                                                              | 12  | rs2708079  | 41202340  | A  |     | 0.125 | 0.408 | G     | 13.19 | 0.2072 | 2.82E-04 | 7.32E-03 | 6.48E-03 | q12     | T C     | PRICKLE1      | intronic             |
|                                                              | 9   | rs7042145  | 8394095   | T  |     | 0.750 | 0.474 | C     | 12.12 | 3.33   | 4.99E-04 | 1.30E-02 | 6.48E-03 | p24.1   | T C     | PTPRD         | intronic             |
|                                                              | 5   | rs149473   | 123648735 | C  |     | 0.000 | 0.169 | T     | 8.145 | 0      | 4.32E-03 | 1.12E-01 | 3.74E-02 | q23.2   |         |               |                      |
|                                                              | 4   | rs2871491  | 186937857 | A  |     | 0.000 | 0.153 | G     | 7.218 | 0      | 7.22E-03 | 1.88E-01 | 4.20E-02 | q35.1   | G A     | SORBS2        | intronic             |
|                                                              | 7   | rs4337997  | 22351942  | G  |     | 0.025 | 0.189 | A     | 7.016 | 0.1098 | 8.08E-03 | 2.10E-01 | 4.20E-02 | p15.3   | A G     | RAPGEF5       | intronic             |
|                                                              | 6   | rs7756298  | 40808750  | T  |     | 0.125 | 0.315 | C     | 6.638 | 0.3111 | 9.98E-03 | 2.60E-01 | 4.33E-02 | p21.1   |         |               |                      |
|                                                              | 6   | rs12529308 | 40797708  | A  |     | 0.125 | 0.301 | C     | 5.877 | 0.3312 | 1.53E-02 | 3.99E-01 | 5.68E-02 | p21.1   |         |               |                      |
|                                                              | 9   | rs3780457  | 99962228  | T  |     | 0.000 | 0.124 | C     | 5.649 | 0      | 1.75E-02 | 4.54E-01 | 5.68E-02 | q22.33  | G A     | CORO2A        | intronic             |
|                                                              | 7   | rs12333620 | 22324730  | T  |     | 0.075 | 0.218 | G     | 4.772 | 0.291  | 2.89E-02 | 7.52E-01 | 7.26E-02 | p15.3   | G T     | RAPGEF5       | intronic             |
|                                                              | 7   | rs1568571  | 22341449  | G  |     | 0.075 | 0.218 | A     | 4.751 | 0.2917 | 2.93E-02 | 7.61E-01 | 7.26E-02 | p15.3   | T C     | RAPGEF5       | intronic             |
|                                                              | 2   | rs6745182  | 190533471 | C  |     | 0.000 | 0.105 | T     | 4.668 | 0      | 3.07E-02 | 7.99E-01 | 7.26E-02 | q32.2   | T C     | C2orf88       | intronic             |
|                                                              | 5   | rs10059061 | 95806928  | C  |     | 0.000 | 0.097 | A     | 4.313 | 0      | 3.78E-02 | 9.84E-01 | 8.20E-02 | q15     | A C     | CTD-2337A12.1 |                      |
|                                                              | 6   | rs6912147  | 22371817  | G  |     | 0.000 | 0.094 | A     | 4.164 | 0      | 4.13E-02 | 1.00E+00 | 8.26E-02 | p22.3   | G A     | RP3-404K8     | intronic             |
|                                                              | 5   | rs1870658  | 73612235  | C  |     | 0.000 | 0.086 | T     | 3.738 | 0      | 5.32E-02 | 1.00E+00 | 9.22E-02 | q13.3   |         |               |                      |
|                                                              | 5   | rs471405   | 73613440  | A  |     | 0.000 | 0.086 | G     | 3.738 | 0      | 5.32E-02 | 1.00E+00 | 9.22E-02 | q13.3   |         |               |                      |
| Q4 (N = 15)                                                  | CHR | SNP        | BP        | A1 | F_A | F_U   | A2    | CHISQ | OR    | UNADJ  | BONF     | FDR_BH   | Band     | Alleles | Gene(s) | Role          |                      |
|                                                              | 6   | rs12529308 | 40797708  | A  |     | 0.600 | 0.301 | C     | 12.59 | 3.477  | 3.89E-04 | 1.01E-02 | 5.26E-03 | p21.1   |         |               |                      |
|                                                              | 7   | rs4337997  | 22351942  | G  |     | 0.433 | 0.189 | A     | 11.49 | 3.275  | 7.00E-04 | 1.82E-02 | 5.26E-03 | p15.3   | A G     | RAPGEF5       | intronic             |
|                                                              | 9   | rs7042145  | 8394095   | T  |     | 0.167 | 0.474 | C     | 11.3  | 0.222  | 7.77E-04 | 2.02E-02 | 5.26E-03 | p24.1   | T C     | PTPRD         | intronic             |
|                                                              | 6   | rs7756298  | 40808750  | T  |     | 0.600 | 0.315 | C     | 11.22 | 3.266  | 8.10E-04 | 2.11E-02 | 5.26E-03 | p21.1   |         |               |                      |
|                                                              | 12  | rs2708079  | 41202340  | A  |     | 0.700 | 0.408 | G     | 10.5  | 3.384  | 1.19E-03 | 3.10E-02 | 6.21E-03 | q12     | T C     | PRICKLE1      | intronic             |
|                                                              | 16  | rs17261378 | 81231342  | A  |     | 0.200 | 0.066 | G     | 8.679 | 3.559  | 3.22E-03 | 8.37E-02 | 1.05E-02 | q23.3   | G A     | CDH13         | intronic             |
|                                                              | 2   | rs6745182  | 190533471 | C  |     | 0.267 | 0.105 | T     | 8.293 | 3.113  | 3.98E-03 | 1.03E-01 | 1.05E-02 | q32.2   | T C     | C2orf88       | intronic             |
|                                                              | 5   | rs1870658  | 73612235  | C  |     | 0.233 | 0.086 | T     | 8.251 | 3.254  | 4.07E-03 | 1.06E-01 | 1.05E-02 | q13.3   |         |               |                      |
|                                                              | 5   | rs471405   | 73613440  | A  |     | 0.233 | 0.086 | G     | 8.251 | 3.254  | 4.07E-03 | 1.06E-01 | 1.05E-02 | q13.3   |         |               |                      |
|                                                              | 7   | rs1568571  | 22341449  | G  |     | 0.433 | 0.218 | A     | 8.128 | 2.751  | 4.36E-03 | 1.13E-01 | 1.05E-02 | p15.3   | T C     | RAPGEF5       | intronic             |
|                                                              | 7   | rs12333620 | 22324730  | T  |     | 0.433 | 0.218 | G     | 8.086 | 2.745  | 4.46E-03 | 1.16E-01 | 1.05E-02 | p15.3   | G T     | RAPGEF5       | intronic             |
|                                                              | 8   | rs11784372 | 121589419 | C  |     | 0.167 | 0.054 | T     | 7.384 | 3.521  | 6.58E-03 | 1.71E-01 | 1.34E-02 | q24.12  | T C     | MTBP          | intronic             |
|                                                              | 17  | rs9894565  | 17047909  | A  |     | 0.533 | 0.305 | G     | 7.355 | 2.611  | 6.69E-03 | 1.74E-01 | 1.34E-02 | p11.2   | A G     | PLD6          | intronic             |
|                                                              | 6   | rs1233386  | 29666169  | A  |     | 0.321 | 0.143 | G     | 7.171 | 2.835  | 7.41E-03 | 1.93E-01 | 1.38E-02 | p22.1   | C T     | GABBR1        | intronic             |
|                                                              | 3   | rs6438175  | 115134904 | C  |     | 0.167 | 0.063 | T     | 5.46  | 2.997  | 1.95E-02 | 5.06E-01 | 3.37E-02 | q13.31  | T C     | GRAMD1C       | intronic             |
|                                                              | 13  | rs12874523 | 105487642 | C  |     | 0.333 | 0.174 | A     | 5.213 | 2.368  | 2.24E-02 | 5.83E-01 | 3.64E-02 | q33.2   |         |               |                      |
|                                                              | 3   | rs9310756  | 24767428  | C  |     | 0.233 | 0.119 | T     | 3.718 | 2.258  | 5.38E-02 | 1.00E+00 | 8.23E-02 | p24.2   | T C     | AC133680      | intronic             |
