# Supplementary material for: ASD Phenotype—Genotype Associations in Concordant and Discordant Monozygotic and Dizygotic Twins Stratified by Severity of Autistic Traits
Source: MDPI journal article supplement (doi:10.3390/ijms20153804), 2019-08-03
Supplement: s1 [file s1]

Summary of case-control analyses by quartiles of cMZ twins

Language

| Q1 (N = 13) | CHR | SNP       | BP       | A1 | F_A     | F_U     | A2 | CHISQ | OR     | UNADJ    | BONF     | FDR_BH   | Band   | Alleles | Gene(s) | Role   |
|-------------|-----|-----------|----------|----|---------|---------|----|-------|--------|----------|----------|----------|--------|---------|---------|--------|
|             | 6   | rs7767901 | 9014658  | C  | 0.03846 | 0.2117  | T  | 4.666 | 0.1489 | 3.08E-02 | 1.23E-01 | 6.39E-02 | 6p24.3 | C/T     |         |        |
|             | 6   | rs6597379 | 9000801  | T  | 0.03846 | 0.21    | C  | 4.601 | 0.1505 | 3.20E-02 | 1.28E-01 | 6.39E-02 | 6p24.3 | C/T     |         |        |
| Q4 (N = 18) | CHR | SNP       | BP       | A1 | F_A     | F_U     | A2 | CHISQ | OR     | UNADJ    | BONF     | FDR_BH   | Band   | Alleles | Gene(s) | Role   |
|             | 8   | rs4481588 | 35609723 | T  | 0.25    | 0.08764 | C  | 11.64 | 3.47   | 6.46E-04 | 2.59E-03 | 2.59E-03 | 8p12   | C/T     | UNC5D   | Intron |
|             | 5   | rs2546481 | 1.15E+08 | T  | 0.3056  | 0.1445  | C  | 7.448 | 2.605  | 6.35E-03 | 2.54E-02 | 1.27E-02 | 5q22.3 | C/T     |         |        |
|             | 6   | rs6597379 | 9000801  | T  | 0.3611  | 0.21    | C  | 4.902 | 2.127  | 2.68E-02 | 1.07E-01 | 2.91E-02 | 6p24.3 | C/T     |         |        |
|             | 6   | rs7767901 | 9014658  | C  | 0.3611  | 0.2117  | T  | 4.762 | 2.105  | 2.91E-02 | 1.16E-01 | 2.91E-02 | 6p24.3 | C/T     |         |        |

Nonverbal

| Q1 (N = 11) | CHR | SNP       | BP       | A1 | F_A     | F_U    | A2 | CHISQ | OR     | UNADJ    | BONF     | FDR_BH   | Band     | Alleles | Gene(s) | Role     |
|-------------|-----|-----------|----------|----|---------|--------|----|-------|--------|----------|----------|----------|----------|---------|---------|----------|
|             | 8   | rs359782  | 47302891 | A  | 0.65    | 0.2483 | G  | 17.14 | 5.623  | 3.47E-05 | 4.17E-04 | 4.17E-04 | 8q11.1   | A/G     |         |          |
|             | 14  | rs7145220 | 34193684 | G  | 0.75    | 0.3704 | A  | 12.28 | 5.099  | 4.57E-04 | 5.48E-03 | 2.74E-03 | 14q13.1  | A/G     |         |          |
|             | 4   | rs1313228 | 20972739 | G  | 0.8182  | 0.4608 | A  | 11.25 | 5.265  | 7.96E-04 | 9.55E-03 | 3.18E-03 | 4p15.2   | A/G     | KCNIP4  | Intron   |
|             | 22  | rs2073454 | 20847479 | A  | 0.75    | 0.4123 | C  | 9.361 | 4.276  | 2.22E-03 | 2.66E-02 | 4.21E-03 | 22q11.22 | A/C     |         |          |
|             | 5   | rs2216904 | 51769238 | T  | 0.7273  | 0.409  | C  | 9.168 | 3.853  | 2.46E-03 | 2.96E-02 | 4.21E-03 | 5q11.2   | C/T     |         |          |
|             | 7   | rs1023568 | 26875121 | C  | 0.3182  | 0.1133 | T  | 9.087 | 3.652  | 2.58E-03 | 3.09E-02 | 4.21E-03 | 7p15.2   | C/T     | SKAP2   | Promoter |
|             | 4   | rs893929  | 1.44E+08 | A  | 0.1364  | 0.4559 | G  | 9.018 | 0.1885 | 2.67E-03 | 3.21E-02 | 4.21E-03 | 4q31.21  | A/G     |         |          |
|             | 13  | rs1886215 | 41847359 | T  | 0.7273  | 0.4128 | C  | 8.928 | 3.794  | 2.81E-03 | 3.37E-02 | 4.21E-03 | 13q14.11 | C/T     |         |          |
|             | 1   | rs1092530 | 2.35E+08 | T  | 0.3182  | 0.1189 | C  | 8.244 | 3.457  | 4.09E-03 | 4.91E-02 | 4.99E-03 | 1q43     | C/T     | RYR2    | Intron   |
|             | 3   | rs1554125 | 58252541 | A  | 0.5455  | 0.2724 | C  | 8.215 | 3.205  | 4.16E-03 | 4.99E-02 | 4.99E-03 | 3p14.3   | A/C     | ABHD6   | Intron   |
|             | 13  | rs2221406 | 88972527 | A  | 0.4091  | 0.1783 | G  | 7.928 | 3.191  | 4.87E-03 | 5.84E-02 | 5.31E-03 | 13q31.3  | A/G     |         |          |
|             | 4   | rs1768636 | 1.44E+08 | A  | 0.1364  | 0.4017 | G  | 6.423 | 0.2351 | 1.13E-02 | 1.35E-01 | 1.13E-02 | 4q31.21  | A/G     |         |          |
| Q4 (N = 18) | CHR | SNP       | BP       | A1 | F_A     | F_U    | A2 | CHISQ | OR     | UNADJ    | BONF     | FDR_BH   | Band     | Alleles | Gene(s) | Role     |
|             | 4   | rs1768636 | 1.44E+08 | A  | 0.6667  | 0.4017 | G  | 10.42 | 2.979  | 1.25E-03 | 1.50E-02 | 1.50E-02 | 4q31.21  | A/G     |         |          |
|             | 22  | rs2073454 | 20847479 | A  | 0.1667  | 0.4123 | C  | 8.911 | 0.285  | 2.84E-03 | 3.40E-02 | 1.70E-02 | 22q11.22 | A/C     |         |          |
|             | 4   | rs893929  | 1.44E+08 | A  | 0.6667  | 0.4559 | G  | 6.398 | 2.387  | 1.14E-02 | 1.37E-01 | 3.48E-02 | 4q31.21  | A/G     |         |          |
|             | 14  | rs7145220 | 34193684 | G  | 0.1667  | 0.3704 | A  | 6.372 | 0.3399 | 1.16E-02 | 1.39E-01 | 3.48E-02 | 14q13.1  | A/G     |         |          |
|             | 13  | rs2221406 | 88972527 | A  | 0.02778 | 0.1783 | G  | 5.552 | 0.1317 | 1.85E-02 | 2.22E-01 | 3.85E-02 | 13q31.3  | A/G     |         |          |
|             | 8   | rs359782  | 47302891 | A  | 0.08333 | 0.2483 | G  | 5.226 | 0.2752 | 2.23E-02 | 2.67E-01 | 3.85E-02 | 8q11.1   | A/G     |         |          |
|             | 1   | rs1092530 | 2.35E+08 | T  | 0       | 0.1189 | C  | 4.855 | 0      | 2.76E-02 | 3.31E-01 | 3.85E-02 | 1q43     | C/T     | RYR2    | Intron   |
|             | 4   | rs1313228 | 20972739 | G  | 0.2778  | 0.4608 | A  | 4.821 | 0.45   | 2.81E-02 | 3.38E-01 | 3.85E-02 | 4p15.2   | A/G     | KCNIP4  | Intron   |
|             | 3   | rs1554125 | 58252541 | A  | 0.1111  | 0.2724 | C  | 4.704 | 0.3339 | 3.01E-02 | 3.61E-01 | 3.85E-02 | 3p14.3   | A/C     | ABHD6   | Intron   |
|             | 7   | rs1023568 | 26875121 | C  | 0       | 0.1133 | T  | 4.596 | 0      | 3.21E-02 | 3.85E-01 | 3.85E-02 | 7p15.2   | C/T     | SKAP2   | Promoter |
|             | 13  | rs1886215 | 41847359 | T  | 0.25    | 0.4128 | C  | 3.909 | 0.4742 | 4.80E-02 | 5.76E-01 | 5.24E-02 | 13q14.11 | C/T     |         |          |
|             | 5   | rs2216904 | 51769238 | T  | 0.25    | 0.409  | C  | 3.741 | 0.4817 | 5.31E-02 | 6.37E-01 | 5.31E-02 | 5q11.2   | C/T     |         |          |

Play

| Q1 (N = 14) | CHR | SNP       | BP       | A1 | F_A     | F_U    | A2 | CHISQ | OR     | UNADJ    | BONF     | FDR_BH   | Band   | Alleles | Gene(s) | Role   |
|-------------|-----|-----------|----------|----|---------|--------|----|-------|--------|----------|----------|----------|--------|---------|---------|--------|
| in Q1       | 1   | rs497576  | 2.38E+08 | T  | 0.1538  | 0.4754 | C  | 10.73 | 0.2006 | 1.06E-03 | 5.28E-03 | 5.28E-03 | 1q43   | C/T     | CHRM3   | Intron |
|             | 4   | rs1313091 | 1.74E+08 | T  | 0.4643  | 0.2463 | C  | 7.103 | 2.652  | 7.70E-03 | 3.85E-02 | 1.10E-02 | 4q34.1 | C/T     | GALNTL6 | Intron |
|             | 3   | rs347134  | 32414789 | C  | 0.1071  | 0.3456 | T  | 7.012 | 0.2272 | 8.10E-03 | 4.05E-02 | 1.10E-02 | 3p22.3 | C/T     | CMTM7   | Intron |
|             | 2   | rs1866472 | 1.29E+08 | T  | 0.1071  | 0.3426 | C  | 6.863 | 0.2303 | 8.80E-03 | 4.40E-02 | 1.10E-02 | 2q14.3 | C/T     |         |        |
|             | 5   | rs357519  | 87546610 | G  | 0       | 0.1385 | T  | 4.177 | 0      | 4.10E-02 | 2.05E-01 | 4.10E-02 | 5q14.3 | G/T     | TMEM161 | Intron |
| Q4 (N = 14) | CHR | SNP       | BP       | A1 | F_A     | F_U    | A2 | CHISQ | OR     | UNADJ    | BONF     | FDR_BH   | Band   | Alleles | Gene(s) | Role   |
| in Q4       | 5   | rs357519  | 87546610 | G  | 0.4286  | 0.1385 | T  | 19.43 | 4.665  | 1.04E-05 | 5.21E-05 | 5.21E-05 | 5q14.3 | G/T     | TMEM161 | Intron |
|             | 2   | rs1866472 | 1.29E+08 | T  | 0.625   | 0.3426 | C  | 8.437 | 3.198  | 3.68E-03 | 1.84E-02 | 9.19E-03 | 2q14.3 | C/T     |         |        |
|             | 4   | rs1313091 | 1.74E+08 | T  | 0.03571 | 0.2463 | C  | 6.672 | 0.1133 | 9.79E-03 | 4.90E-02 | 1.23E-02 | 4q34.1 | C/T     | GALNTL6 | Intron |
|             | 1   | rs497576  | 2.38E+08 | T  | 0.7143  | 0.4754 | C  | 6.367 | 2.758  | 1.16E-02 | 5.81E-02 | 1.23E-02 | 1q43   | C/T     | CHRM3   | Intron |
|             | 3   | rs347134  | 32414789 | C  | 0.5714  | 0.3456 | T  | 6.268 | 2.525  | 1.23E-02 | 6.15E-02 | 1.23E-02 | 3p22.3 | C/T     | CMTM7   | Intron |

Social

| Q1 (N = 15) | CHR | SNP       | BP       | A1 | F_A    | F_U    | A2 | CHISQ | OR    | UNADJ    | BONF     | FDR_BH   | Band   | Alleles | Genes     | Role                |
|-------------|-----|-----------|----------|----|--------|--------|----|-------|-------|----------|----------|----------|--------|---------|-----------|---------------------|
|             | 6   | rs1115371 | 1.18E+08 | T  | 0.6333 | 0.2313 | C  | 26.91 | 5.741 | 2.13E-07 | 1.51E-05 | 1.51E-05 |        |         |           |                     |
|             | 3   | rs9682960 | 11064345 | C  | 0.3667 | 0.1142 | T  | 18.57 | 4.491 | 1.64E-05 | 1.16E-03 | 3.29E-04 | p25.3  |         |           |                     |
|             | 8   | rs7827943 | 73568186 | A  | 0.5667 | 0.2327 | G  | 18.52 | 4.313 | 1.68E-05 | 1.20E-03 | 3.29E-04 | q13.3  | A/G     |           |                     |
|             | 6   | rs3004002 | 77426060 | T  | 0.7667 | 0.3847 | C  | 18.34 | 5.255 | 1.85E-05 | 1.32E-03 | 3.29E-04 | q14.1  | G A     | RP11-354K | Supstream           |
|             | 8   | rs1010002 | 73553339 | A  | 0.4667 | 0.1775 | C  | 16.92 | 4.054 | 3.89E-05 | 2.76E-03 | 5.52E-04 | q13.3  | A/C     |           |                     |
|             | 8   | rs359782  | 47302891 | A  | 0.5769 | 0.2482 | G  | 14.9  | 4.131 | 1.13E-04 | 8.04E-03 | 1.34E-03 | q11.1  |         |           |                     |
|             | 3   | rs4365667 | 1.67E+08 | A  | 0.5667 | 0.2715 | C  | 13.08 | 3.509 | 2.99E-04 | 2.12E-02 | 2.72E-03 | q26.1  |         |           |                     |
|             | 8   | rs9650442 | 47224322 | T  | 0.5333 | 0.2493 | C  | 12.78 | 3.441 | 3.51E-04 | 2.49E-02 | 2.72E-03 | q11.1  |         |           |                     |
|             | 8   | rs7836486 | 47062007 | A  | 0.5333 | 0.2524 | C  | 12.42 | 3.386 | 4.25E-04 | 3.02E-02 | 2.72E-03 | q11.1  | A/C     |           |                     |
|             | 12  | rs8186746 | 36633905 | T  | 0.7667 | 0.4461 | G  | 12.38 | 4.08  | 4.33E-04 | 3.08E-02 | 2.72E-03 | q12    |         |           |                     |
|             | 8   | rs1009982 | 47711911 | G  | 0.5333 | 0.254  | A  | 12.22 | 3.357 | 4.73E-04 | 3.36E-02 | 2.72E-03 | q11.1  |         |           |                     |
|             | 8   | rs7293777 | 47261663 | T  | 0.5333 | 0.2547 | C  | 12.13 | 3.344 | 4.97E-04 | 3.53E-02 | 2.72E-03 | q11.1  |         |           |                     |
|             | 8   | rs990760  | 47859016 | T  | 0.5333 | 0.257  | C  | 11.88 | 3.305 | 5.69E-04 | 4.04E-02 | 2.72E-03 | q11.1  | A G     | MTND1P7   | non-coding intronic |
|             | 8   | rs1916188 | 47915603 | A  | 0.5333 | 0.2581 | C  | 11.74 | 3.285 | 6.10E-04 | 4.33E-02 | 2.72E-03 | q11.1  |         |           |                     |
|             | 8   | rs1113614 | 47240116 | G  | 0.5333 | 0.2581 | A  | 11.74 | 3.284 | 6.12E-04 | 4.35E-02 | 2.72E-03 | q11.1  | A/G     |           |                     |
|             | 18  | rs1768373 | 52800291 | A  | 0.5    | 0.2338 | G  | 11.74 | 3.277 | 6.12E-04 | 4.35E-02 | 2.72E-03 | q21.31 | G A     | WDR7      | intronic            |
|             | 8   | rs359807  | 47309786 | T  | 0.5333 | 0.2595 | C  | 11.58 | 3.261 | 6.66E-04 | 4.73E-02 | 2.77E-03 | q11.1  | A/G     |           |                     |
|             | 8   | rs2354491 | 47901302 | C  | 0.5333 | 0.2604 | T  | 11.49 | 3.246 | 7.01E-04 | 4.98E-02 | 2.77E-03 | q11.1  | G A     | RP11-101E | 3downstream         |

|    |           |          |   |         |         |   |       |        |          |          |          |        |     |            |                     |
|----|-----------|----------|---|---------|---------|---|-------|--------|----------|----------|----------|--------|-----|------------|---------------------|
| 8  | rs4873076 | 47255301 | C | 0.5333  | 0.2633  | T | 11.17 | 3.198  | 8.32E-04 | 5.91E-02 | 3.03E-03 | q11.1  | C/T |            |                     |
| 1  | rs4908488 | 7947179  | C | 0.4     | 0.1699  | T | 11.12 | 3.257  | 8.54E-04 | 6.06E-02 | 3.03E-03 | p36.23 | T C | PARK7      | intronic            |
| 13 | rs1417216 | 65202004 | A | 0.2     | 0.05763 | G | 10.97 | 4.088  | 9.25E-04 | 6.56E-02 | 3.09E-03 | q21.32 |     |            |                     |
| 8  | rs7293734 | 47457400 | T | 0.5333  | 0.2662  | C | 10.85 | 3.15   | 9.88E-04 | 7.02E-02 | 3.09E-03 | q11.1  |     |            |                     |
| 12 | rs1230693 | 36528296 | T | 0.7667  | 0.4673  | C | 10.73 | 3.745  | 1.06E-03 | 7.49E-02 | 3.09E-03 | q12    |     |            |                     |
| 8  | rs1199170 | 77674728 | A | 0.4     | 0.173   | G | 10.68 | 3.188  | 1.09E-03 | 7.71E-02 | 3.09E-03 | q21.11 | G A | ZFHx4-AS1  | non-coding intronic |
| 10 | rs3802739 | 1.21E+08 | C | 0.6667  | 0.3764  | T | 10.67 | 3.313  | 1.09E-03 | 7.71E-02 | 3.09E-03 | q26.11 | T C | FAM45A     | intronic            |
| 8  | rs4535748 | 47582366 | T | 0.5333  | 0.2688  | C | 10.58 | 3.109  | 1.15E-03 | 8.13E-02 | 3.13E-03 | q11.1  | G A | HSPA8P13   | 3downstream         |
| 6  | rs9379030 | 6340921  | G | 0.4333  | 0.1972  | A | 10.44 | 3.113  | 1.23E-03 | 8.74E-02 | 3.20E-03 | p25.1  | A G | LY86_AS1   | non-coding intronic |
| 12 | rs7966266 | 36912405 | A | 0.7667  | 0.4718  | G | 10.4  | 3.679  | 1.26E-03 | 8.95E-02 | 3.20E-03 | q12    |     |            |                     |
| 10 | rs6602032 | 3159771  | G | 0.6     | 0.3249  | A | 10.26 | 3.117  | 1.36E-03 | 9.65E-02 | 3.30E-03 | p15.2  | G A | PFKP       | intronic            |
| 10 | rs915272  | 1.21E+08 | T | 0.6667  | 0.382   | C | 10.21 | 3.235  | 1.39E-03 | 9.89E-02 | 3.30E-03 | q26.11 | T C | FAM45B     | non-coding intronic |
| 1  | rs2140682 | 34596209 | C | 0.1667  | 0.4549  | T | 9.995 | 0.2397 | 1.57E-03 | 1.11E-01 | 3.45E-03 | p34.3  |     |            |                     |
| 6  | rs9374710 | 1.19E+08 | A | 0.06667 | 0.3391  | C | 9.9   | 0.1392 | 1.65E-03 | 1.17E-01 | 3.45E-03 | q22.2  | C A | SLC35F1    | intronic            |
| 6  | rs4245496 | 1.18E+08 | T | 0.06667 | 0.3387  | C | 9.877 | 0.1394 | 1.67E-03 | 1.19E-01 | 3.45E-03 | q22.2  | C T | SLC35F1    | intronic            |
| 3  | rs1332011 | 1.24E+08 | C | 0.7     | 0.4163  | T | 9.862 | 3.271  | 1.69E-03 | 1.20E-01 | 3.45E-03 | q21.1  | T C | FAM162A    | intronic            |
| 1  | rs2049420 | 34596147 | C | 0.1333  | 0.4165  | T | 9.847 | 0.2156 | 1.70E-03 | 1.21E-01 | 3.45E-03 | p34.3  |     |            |                     |
| 4  | rs7664705 | 1.79E+08 | T | 0.06667 | 0.335   | C | 9.663 | 0.1418 | 1.88E-03 | 1.34E-01 | 3.71E-03 | q34.3  | C T | RP11-130F  | non-coding intronic |
| 8  | rs359813  | 47339255 | A | 0.5     | 0.2472  | G | 9.516 | 3.046  | 2.04E-03 | 1.45E-01 | 3.91E-03 | q11.1  | C/T |            |                     |
| 5  | rs6556348 | 1.58E+08 | T | 0.7     | 0.4231  | C | 9.357 | 3.182  | 2.22E-03 | 1.58E-01 | 4.15E-03 | q33.3  | C T | RP11-542A  | non-coding intronic |
| 8  | rs1113615 | 47292439 | T | 0.5     | 0.2593  | G | 8.966 | 2.857  | 2.75E-03 | 1.95E-01 | 5.01E-03 | q11.1  | T G | AC113134   | 3downstream         |
| 20 | rs2209339 | 12607029 | A | 0.2     | 0.471   | C | 8.793 | 0.2808 | 3.02E-03 | 2.15E-01 | 5.37E-03 | p12.1  |     |            |                     |
| 5  | rs253365  | 16850415 | C | 0.7     | 0.4372  | T | 8.359 | 3.003  | 3.84E-03 | 2.73E-01 | 6.62E-03 | p15.1  | C T | MYO10      | intronic            |
| 7  | rs1048690 | 88621188 | T | 0.06667 | 0.3109  | C | 8.321 | 0.1584 | 3.92E-03 | 2.78E-01 | 6.62E-03 | q21.13 | C T | ZNF804B    | intronic            |
| 12 | rs1601746 | 36912462 | C | 0.2333  | 0.4891  | A | 7.806 | 0.3179 | 5.21E-03 | 3.70E-01 | 8.60E-03 | q12    |     |            |                     |
| 10 | rs4880592 | 3163581  | G | 0.1333  | 0.3794  | A | 7.677 | 0.2517 | 5.59E-03 | 3.97E-01 | 9.02E-03 | p15.2  | A G | PFKP       | intronic            |
| 7  | rs7787455 | 88588409 | A | 0.06667 | 0.2914  | G | 7.312 | 0.1737 | 6.85E-03 | 4.86E-01 | 1.08E-02 | q21.13 | A G | ZNF804B    | intronic            |
| 8  | rs1205636 | 47588382 | A | 0.5     | 0.2676  | G | 7.108 | 2.737  | 7.68E-03 | 5.45E-01 | 1.19E-02 | q11.1  |     |            |                     |
| 8  | rs406800  | 88604177 | G | 0.7333  | 0.493   | A | 6.888 | 2.828  | 8.68E-03 | 6.16E-01 | 1.31E-02 | q21.3  | C T | CNBD1      | intronic            |
| 9  | rs1160246 | 1.19E+08 | T | 0.6333  | 0.4006  | C | 6.719 | 2.585  | 9.54E-03 | 6.77E-01 | 1.41E-02 | q33.1  | C T | ASTN2      | intronic            |
| 9  | rs871120  | 1.19E+08 | A | 0.6333  | 0.4025  | G | 6.598 | 2.564  | 1.02E-02 | 7.25E-01 | 1.48E-02 | q33.1  | C T | ASTN2      | intronic            |
| 12 | rs2138077 | 1.27E+08 | A | 0.1667  | 0.393   | G | 6.412 | 0.3089 | 1.13E-02 | 8.05E-01 | 1.61E-02 | q24.32 |     |            |                     |
| 2  | rs6743414 | 49277575 | A | 0       | 0.1748  | G | 6.345 | 0      | 1.18E-02 | 8.36E-01 | 1.64E-02 | p16.3  |     |            |                     |
| 7  | rs2189061 | 88577308 | T | 0.03333 | 0.2224  | G | 6.185 | 0.1206 | 1.29E-02 | 9.15E-01 | 1.74E-02 | q21.13 | T G | ZNF804B    | intronic            |
| 13 | rs9635033 | 79956028 | T | 0.2     | 0.4248  | G | 6.17  | 0.3385 | 1.30E-02 | 9.23E-01 | 1.74E-02 | q31.1  |     |            |                     |
| 5  | rs7724820 | 1.58E+08 | A | 0.6333  | 0.4113  | G | 6.064 | 2.472  | 1.38E-02 | 9.80E-01 | 1.81E-02 | q33.3  | G A | LOC10192'  | non-coding intronic |
| 13 | rs9532449 | 39369698 | T | 0.1333  | 0.3443  | C | 5.888 | 0.293  | 1.52E-02 | 1.00E+00 | 1.97E-02 | q14.11 |     |            |                     |
| 17 | rs1165610 | 73754653 | T | 0.1667  | 0.3796  | C | 5.747 | 0.3269 | 1.65E-02 | 1.00E+00 | 2.09E-02 | q25.3  | C T | THA1P      | 3downstream         |
| 11 | rs479844  | 65308533 | T | 0.2667  | 0.4821  | C | 5.545 | 0.3906 | 1.85E-02 | 1.00E+00 | 2.31E-02 | q13.1  |     |            |                     |
| 18 | rs1940979 | 23511166 | T | 0.1667  | 0.364   | C | 5.024 | 0.3494 | 2.50E-02 | 1.00E+00 | 3.06E-02 | q12.1  |     |            |                     |
| 13 | rs2221406 | 88972527 | A | 0.3333  | 0.1782  | G | 4.879 | 2.306  | 2.72E-02 | 1.00E+00 | 3.23E-02 | q31.3  |     |            |                     |
| 5  | rs1952651 | 1.58E+08 | G | 0.6333  | 0.4329  | T | 4.875 | 2.263  | 2.73E-02 | 1.00E+00 | 3.23E-02 | q33.3  | A C | LOC10192'  | non-coding intronic |
| 7  | rs7802386 | 88591218 | A | 0       | 0.1391  | C | 4.844 | 0      | 2.78E-02 | 1.00E+00 | 3.23E-02 | q21.13 | A C | ZNF804B    | intronic            |
| 21 | rs2822892 | 15044008 | G | 0.5667  | 0.3733  | A | 4.762 | 2.196  | 2.91E-02 | 1.00E+00 | 3.32E-02 | q11.2  | A G | AF127936.  | non-coding intronic |
| 3  | rs1170873 | 72008678 | C | 0.4     | 0.2315  | T | 4.741 | 2.213  | 2.95E-02 | 1.00E+00 | 3.32E-02 | p13    |     |            |                     |
| 2  | rs6433615 | 1.77E+08 | G | 0.3     | 0.158   | A | 4.501 | 2.284  | 3.39E-02 | 1.00E+00 | 3.76E-02 | q31.1  | A G | AC092162.  | non-coding intronic |
| 8  | rs6473217 | 81360413 | T | 0.06667 | 0.2268  | C | 4.372 | 0.2436 | 3.65E-02 | 1.00E+00 | 3.99E-02 | q21.13 | T C | RP11-941F  | non-coding intronic |
| 5  | rs4704936 | 1.58E+08 | G | 0.6333  | 0.4527  | T | 3.923 | 2.088  | 4.76E-02 | 1.00E+00 | 5.12E-02 | q33.3  | T G | LOC10192'  | non-coding intronic |
| 3  | rs1554125 | 58252541 | A | 0.4333  | 0.2723  | C | 3.893 | 2.044  | 4.85E-02 | 1.00E+00 | 5.14E-02 | p14.3  | A C | ABHD6      | intronic            |
| 8  | rs4872963 | 47950630 | T | 0.5333  | 0.3622  | C | 3.776 | 2.013  | 5.20E-02 | 1.00E+00 | 5.43E-02 | q11.1  |     |            |                     |
| 3  | rs6445971 | 58289364 | G | 0.4333  | 0.281   | T | 3.419 | 1.957  | 6.44E-02 | 1.00E+00 | 6.63E-02 | p14.3  | G T | RP11-80H15 | upstream            |
| 7  | rs9986865 | 36807127 | C | 0.3     | 0.1783  | T | 3.005 | 1.975  | 8.30E-02 | 1.00E+00 | 8.42E-02 | p14.2  | C/T |            |                     |

| Q4 (N = 14) | CHR | SNP          | BP       | A1 | F_A | F_U     | A2     | CHISQ | OR    | UNADJ   | BONF     | FDR_BH   | Band     | Alleles | Gene(s) | Role      |                     |
|-------------|-----|--------------|----------|----|-----|---------|--------|-------|-------|---------|----------|----------|----------|---------|---------|-----------|---------------------|
|             |     | 8 rs6473217  | 81360413 | T  |     | 0.5714  | 0.2268 | C     | 18.75 | 4.546   | 1.49E-05 | 1.06E-03 | 1.06E-03 | q21.13  | T C     | RP11-941F | non-coding intronic |
|             |     | 7 rs7802386  | 88591218 | A  |     | 0.3929  | 0.1391 | C     | 14.83 | 4.004   | 1.17E-04 | 8.33E-03 | 2.95E-03 | q21.13  | A C     | ZNF804B   | intronic            |
|             |     | 18 rs1940979 | 23511166 | T  |     | 0.7143  | 0.364  | C     | 14.72 | 4.368   | 1.25E-04 | 8.86E-03 | 2.95E-03 | q12.1   |         |           |                     |
|             |     | 13 rs9532449 | 39369698 | T  |     | 0.6429  | 0.3443 | C     | 10.97 | 3.428   | 9.27E-04 | 6.58E-02 | 1.59E-02 | q14.11  |         |           |                     |
|             |     | 10 rs4880592 | 3163581  | G  |     | 0.6786  | 0.3794 | A     | 10.57 | 3.454   | 1.15E-03 | 8.17E-02 | 1.59E-02 | p15.2   | A G     | PFKP      | intronic            |
|             |     | 9 rs871120   | 1.19E+08 | A  |     | 0.1071  | 0.4025 | G     | 10.11 | 0.1781  | 1.47E-03 | 1.05E-01 | 1.59E-02 | q33.1   | C T     | ASTN2     | intronic            |
|             |     | 9 rs1160246  | 1.19E+08 | T  |     | 0.1071  | 0.4006 | C     | 9.997 | 0.1796  | 1.57E-03 | 1.11E-01 | 1.59E-02 | q33.1   | C T     | ASTN2     | intronic            |
|             |     | 7 rs2189061  | 88577308 | T  |     | 0.4643  | 0.2224 | G     | 9.379 | 3.031   | 2.20E-03 | 1.56E-01 | 1.95E-02 | q21.13  | T G     | ZNF804B   | intronic            |
|             |     | 20 rs2209339 | 12607029 | A  |     | 0.75    | 0.471  | C     | 8.692 | 3.369   | 3.20E-03 | 2.27E-01 | 2.52E-02 | p12.1   |         |           |                     |
|             |     | 21 rs2822892 | 15044008 | G  |     | 0.1071  | 0.3733 | A     | 8.441 | 0.2015  | 3.67E-03 | 2.60E-01 | 2.58E-02 | q11.2   | A G     | AF127936. | non-coding intronic |
|             |     | 7 rs7787455  | 88588409 | A  |     | 0.5357  | 0.2914 | G     | 8.027 | 2.806   | 4.61E-03 | 3.27E-01 | 2.58E-02 | q21.13  | A G     | ZNF804B   | intronic            |
|             |     | 3 rs1554125  | 58252541 | A  |     | 0.03571 | 0.2723 | C     | 7.888 | 0.09898 | 4.98E-03 | 3.53E-01 | 2.58E-02 | p14.3   | A C     | ABHD6     | intronic            |
|             |     | 8 rs4872963  | 47950630 | T  |     | 0.1071  | 0.3622 | C     | 7.853 | 0.2113  | 5.07E-03 | 3.60E-01 | 2.58E-02 | q11.1   |         |           |                     |
|             |     | 13 rs9635033 | 79956028 | T  |     | 0.7083  | 0.4248 | G     | 7.847 | 3.288   | 5.09E-03 | 3.61E-01 | 2.58E-02 | q31.1   |         |           |                     |
|             |     | 5 rs6556348  | 1.58E+08 | T  |     | 0.1786  | 0.4231 | C     | 6.826 | 0.2964  | 8.99E-03 | 6.38E-01 | 4.04E-02 | q33.3   | C T     | RP11-542A | non-coding intronic |
|             |     | 10 rs915272  | 1.21E+08 | T  |     | 0.1429  | 0.382  | C     | 6.755 | 0.2696  | 9.35E-03 | 6.64E-01 | 4.04E-02 | q26.11  | T C     | FAM45B    | non-coding intronic |
|             |     | 7 rs1048690  | 88621188 | T  |     | 0.5357  | 0.3109 | C     | 6.556 | 2.558   | 1.05E-02 | 7.42E-01 | 4.04E-02 | q21.13  | C T     | ZNF804B   | intronic            |
|             |     | 10 rs3802739 | 1.21E+08 | C  |     | 0.125   | 0.3764 | T     | 6.439 | 0.2366  | 1.12E-02 | 7.93E-01 | 4.04E-02 | q26.11  | T C     | FAM45A    | intronic            |
|             |     | 5 rs4704936  | 1.58E+08 | G  |     | 0.2143  | 0.4527 | T     | 6.392 | 0.3297  | 1.15E-02 | 8.14E-01 | 4.04E-02 | q33.3   | T G     | LOC10192' | non-coding intronic |
|             |     | 7 rs7795594  | 36794360 | G  |     | 0       | 0.1838 | A     | 6.299 | 0       | 1.21E-02 | 8.58E-01 | 4.04E-02 | p14.2   |         |           |                     |
|             |     | 8 rs7836486  | 47062007 | A  |     | 0.03846 | 0.2524 | C     | 6.29  | 0.1185  | 1.21E-02 | 8.62E-01 | 4.04E-02 | q11.1   |         |           |                     |
|             |     | 5 rs7724820  | 1.58E+08 | A  |     | 0.1786  | 0.4113 | G     | 6.233 | 0.3112  | 1.25E-02 | 8.90E-01 | 4.04E-02 | q33.3   | G A     | LOC10192' | non-coding intronic |

|    |           |          |   |         |        |   |       |        |          |          |          |        |     |            |                     |  |
|----|-----------|----------|---|---------|--------|---|-------|--------|----------|----------|----------|--------|-----|------------|---------------------|--|
| 7  | rs9986865 | 36807127 | C | 0       | 0.1783 | T | 6.068 | 0      | 1.38E-02 | 9.77E-01 | 4.04E-02 | p14.2  |     |            |                     |  |
| 3  | rs6445971 | 58289364 | G | 0.07143 | 0.281  | T | 6.066 | 0.1969 | 1.38E-02 | 9.78E-01 | 4.04E-02 | p14.3  | G T | RP11-80H15 | upstream            |  |
| 11 | rs479844  | 65308533 | T | 0.7143  | 0.4821 | C | 6.008 | 2.685  | 1.42E-02 | 1.00E+00 | 4.04E-02 | q13.1  |     |            |                     |  |
| 8  | rs1199170 | 77674728 | A | 0       | 0.173  | G | 5.849 | 0      | 1.56E-02 | 1.00E+00 | 4.26E-02 | q21.11 | G A | ZFHx4-AS1  | non-coding intronic |  |
| 5  | rs1952651 | 1.58E+08 | G | 0.2143  | 0.4329 | T | 5.424 | 0.3572 | 1.99E-02 | 1.00E+00 | 5.05E-02 | q33.3  | A C | LOC101921  | non-coding intronic |  |
| 12 | rs2138077 | 1.27E+08 | A | 0.6071  | 0.393  | G | 5.344 | 2.387  | 2.08E-02 | 1.00E+00 | 5.05E-02 | q24.32 |     |            |                     |  |
| 8  | rs4873076 | 47255301 | C | 0.07143 | 0.2633 | T | 5.296 | 0.2153 | 2.14E-02 | 1.00E+00 | 5.05E-02 | q11.1  |     |            |                     |  |
| 2  | rs6433615 | 1.77E+08 | G | 0       | 0.158  | A | 5.248 | 0      | 2.20E-02 | 1.00E+00 | 5.05E-02 | q31.1  | A G | AC092162.  | non-coding intronic |  |
| 8  | rs1010002 | 73553339 | A | 0       | 0.1775 | C | 5.174 | 0      | 2.29E-02 | 1.00E+00 | 5.05E-02 | q13.3  |     |            |                     |  |
| 8  | rs359807  | 47309786 | T | 0.07143 | 0.2595 | C | 5.14  | 0.2195 | 2.34E-02 | 1.00E+00 | 5.05E-02 | q11.1  |     |            |                     |  |
| 8  | rs1113615 | 47292439 | T | 0.07143 | 0.2593 | G | 5.128 | 0.2198 | 2.35E-02 | 1.00E+00 | 5.05E-02 | q11.1  | T G | AC113134.  | 3downstream         |  |
| 8  | rs1113614 | 47240116 | G | 0.07143 | 0.2581 | A | 5.082 | 0.2211 | 2.42E-02 | 1.00E+00 | 5.05E-02 | q11.1  |     |            |                     |  |
| 6  | rs4245496 | 1.18E+08 | T | 0.5357  | 0.3387 | C | 4.814 | 2.252  | 2.82E-02 | 1.00E+00 | 5.73E-02 | q22.2  | C T | SLC35F1    | intronic            |  |
| 8  | rs359782  | 47302891 | A | 0.07143 | 0.2482 | G | 4.674 | 0.233  | 3.06E-02 | 1.00E+00 | 6.04E-02 | q11.1  |     |            |                     |  |
| 6  | rs9379030 | 6340921  | G | 0.03571 | 0.1972 | A | 4.602 | 0.1508 | 3.19E-02 | 1.00E+00 | 6.05E-02 | p25.1  | A G | LY86_AS1   | non-coding intronic |  |
| 6  | rs9374710 | 1.19E+08 | A | 0.5385  | 0.3391 | C | 4.578 | 2.274  | 3.24E-02 | 1.00E+00 | 6.05E-02 | q22.2  | C A | SLC35F1    | intronic            |  |
| 17 | rs1165610 | 73754653 | T | 0.5714  | 0.3796 | C | 4.346 | 2.179  | 3.71E-02 | 1.00E+00 | 6.75E-02 | q25.3  | C T | THA1P      | 3downstream         |  |
| 10 | rs6602032 | 3159771  | G | 0.1429  | 0.3249 | A | 4.213 | 0.3463 | 4.01E-02 | 1.00E+00 | 7.05E-02 | p15.2  | G A | PFKP       | intronic            |  |
| 1  | rs2049420 | 34596147 | C | 0.6071  | 0.4165 | T | 4.162 | 2.165  | 4.13E-02 | 1.00E+00 | 7.05E-02 | p34.3  |     |            |                     |  |
| 2  | rs6743414 | 49277575 | A | 0.3214  | 0.1748 | G | 4.137 | 2.237  | 4.20E-02 | 1.00E+00 | 7.05E-02 | p16.3  |     |            |                     |  |
| 18 | rs1768373 | 52800291 | A | 0.07143 | 0.2338 | G | 4.109 | 0.2521 | 4.27E-02 | 1.00E+00 | 7.05E-02 | q21.31 | G A | WDR7       | intronic            |  |
| 8  | rs7827943 | 73568186 | A | 0.07143 | 0.2327 | G | 4.065 | 0.2537 | 4.38E-02 | 1.00E+00 | 7.06E-02 | q13.3  |     |            |                     |  |
| 3  | rs1170873 | 72008678 | C | 0.07143 | 0.2315 | T | 4.022 | 0.2553 | 4.49E-02 | 1.00E+00 | 7.08E-02 | p13    |     |            |                     |  |
| 13 | rs2221406 | 88972527 | A | 0.03571 | 0.1782 | G | 3.874 | 0.1708 | 4.91E-02 | 1.00E+00 | 7.57E-02 | q31.3  |     |            |                     |  |
| 8  | rs4535748 | 47582366 | T | 0.1071  | 0.2688 | C | 3.709 | 0.3264 | 5.41E-02 | 1.00E+00 | 7.74E-02 | q11.1  | G A | HSPA8P13   | 3downstream         |  |
| 8  | rs7293777 | 47261663 | T | 0.08333 | 0.2547 | C | 3.703 | 0.266  | 5.43E-02 | 1.00E+00 | 7.74E-02 | q11.1  |     |            |                     |  |
| 12 | rs1230693 | 36528296 | T | 0.2857  | 0.4673 | C | 3.689 | 0.456  | 5.48E-02 | 1.00E+00 | 7.74E-02 | q12    |     |            |                     |  |
| 8  | rs1009982 | 47711911 | G | 0.08333 | 0.254  | A | 3.677 | 0.267  | 5.52E-02 | 1.00E+00 | 7.74E-02 | q11.1  |     |            |                     |  |
| 8  | rs1205636 | 47588382 | A | 0.1071  | 0.2676 | G | 3.664 | 0.3285 | 5.56E-02 | 1.00E+00 | 7.74E-02 | q11.1  |     |            |                     |  |
| 8  | rs7293734 | 47457400 | T | 0.1071  | 0.2662 | C | 3.613 | 0.3308 | 5.73E-02 | 1.00E+00 | 7.83E-02 | q11.1  |     |            |                     |  |
| 8  | rs9650442 | 47224322 | T | 0.08333 | 0.2493 | C | 3.523 | 0.2737 | 6.05E-02 | 1.00E+00 | 8.11E-02 | q11.1  |     |            |                     |  |
| 8  | rs359813  | 47339255 | A | 0.08333 | 0.2472 | G | 3.452 | 0.2769 | 6.32E-02 | 1.00E+00 | 8.14E-02 | q11.1  |     |            |                     |  |
| 6  | rs3004002 | 77426060 | T | 0.2143  | 0.3847 | C | 3.419 | 0.4362 | 6.44E-02 | 1.00E+00 | 8.14E-02 | q14.1  | G A | RP11-354K  | 5upstream           |  |
| 8  | rs2354491 | 47901302 | C | 0.1071  | 0.2604 | T | 3.402 | 0.3409 | 6.51E-02 | 1.00E+00 | 8.14E-02 | q11.1  | G A | RP11-101E  | 3downstream         |  |
| 4  | rs7664705 | 1.79E+08 | T | 0.5     | 0.335  | C | 3.395 | 1.985  | 6.54E-02 | 1.00E+00 | 8.14E-02 | q34.3  | C T | RP11-130F  | non-coding intronic |  |
| 8  | rs1916188 | 47915603 | A | 0.1071  | 0.2581 | C | 3.321 | 0.3449 | 6.84E-02 | 1.00E+00 | 8.30E-02 | q11.1  |     |            |                     |  |
| 8  | rs990760  | 47859016 | T | 0.1071  | 0.257  | C | 3.28  | 0.347  | 7.01E-02 | 1.00E+00 | 8.30E-02 | q11.1  | A G | MTND1P7,   | non-coding intronic |  |
| 8  | rs406800  | 88604177 | G | 0.3214  | 0.493  | A | 3.28  | 0.4871 | 7.01E-02 | 1.00E+00 | 8.30E-02 | q21.3  | C T | CNBD1      | intronic            |  |
| 5  | rs253365  | 16850415 | C | 0.2692  | 0.4372 | T | 2.968 | 0.4742 | 8.49E-02 | 1.00E+00 | 9.89E-02 | p15.1  | C T | MYO10      | intronic            |  |

Perseverative Behavior (Sameness)

| Q1 (N = 15) | CHR | SNP       | BP       | A1 | F_A     | F_U    | A2     | CHISQ | OR     | UNADJ    | BONF     | FDR_BH   | Band    | Alleles | Gene(s)  | Role       |
|-------------|-----|-----------|----------|----|---------|--------|--------|-------|--------|----------|----------|----------|---------|---------|----------|------------|
|             | 11  | rs4930028 | 2889641  | A  |         | 0.6    | 0.3487 | C     | 8.271  | 2.801    | 4.03E-03 | 1.61E-02 | 11p15.4 | A/C     | SLC22A18 | Intron     |
|             | 5   | rs324454  | 55238308 | A  | 0.6667  | 0.4222 | G      | 7.299 | 2.737  | 6.90E-03 | 2.76E-02 | 1.38E-02 | 5q11.2  | A/G     | IL31RA   | Intron     |
|             | 11  | rs7926034 | 90154444 | A  | 0.6667  | 0.4407 | G      | 6.172 | 2.538  | 1.30E-02 | 5.19E-02 | 1.73E-02 | 11q14.3 | A/G     |          |            |
| Q4 (N = 18) | CHR | SNP       | BP       | A1 | F_A     | F_U    | A2     | CHISQ | OR     | UNADJ    | BONF     | FDR_BH   | Band    | Alleles | Gene(s)  | Role       |
|             | 12  | rs2058604 | 12841126 | A  | 0.6944  | 0.3751 | C      | 15.51 | 3.787  | 8.19E-05 | 3.28E-04 | 3.28E-04 | 12p13.1 | A/C     | APOLD1   | Downstream |
|             | 11  | rs4930028 | 2889641  | A  | 0.08333 | 0.3487 | C      | 11.11 | 0.1698 | 8.58E-04 | 3.43E-03 | 1.72E-03 | 11p15.4 | A/C     | SLC22A18 | Intron     |
|             | 11  | rs7926034 | 90154444 | A  | 0.25    | 0.4407 | G      | 5.276 | 0.423  | 2.16E-02 | 8.65E-02 | 2.88E-02 | 11q14.3 | A/G     |          |            |
|             | 5   | rs324454  | 55238308 | A  | 0.25    | 0.4222 | G      | 4.346 | 0.4562 | 3.71E-02 | 1.48E-01 | 3.71E-02 | 5q11.2  | A/G     | IL31RA   | Intron     |
